# Supplementary material for: Divergent uranium- versus phosphorus-based reduction of Me3SiN3 with steric modification of phosphido ligands
Source: Royal Society of Chemistry journal article supplement (doi:10.1039/d0sc02261f), 2020-01-01
Supplement: d0sc02261f1.pdf [file d0sc02261f1.pdf]

**Supporting Information for**

**Divergent Uranium- versus Phosphorus-Based Reduction of Me<sub>3</sub>SiN<sub>3</sub> with Steric  
Modification of Phosphido Ligands**

## Table of Contents

|                                                                                                                                                   |     |
|---------------------------------------------------------------------------------------------------------------------------------------------------|-----|
| <b>Experimental</b> .....                                                                                                                         | S2  |
| <b>Table S1.</b> Crystallographic parameters for complexes <b>3</b> and <b>4</b> .....                                                            | S8  |
| <b>Figure S1.</b> $^1\text{H}$ NMR spectrum of <b>1</b> in $\text{C}_6\text{D}_6$ .....                                                           | S10 |
| <b>Figure S2.</b> $^1\text{H}$ NMR spectrum of <b>2</b> in $\text{C}_6\text{D}_6$ .....                                                           | S10 |
| <b>Figure S3.</b> $^1\text{H}$ NMR spectrum of <b>3</b> in $\text{C}_6\text{D}_6$ .....                                                           | S11 |
| <b>Figure S4.</b> Close-up of the $^1\text{H}$ NMR spectrum of <b>3</b> in $\text{C}_6\text{D}_6$ .....                                           | S12 |
| <b>Figure S5.</b> $^{31}\text{P}\{^1\text{H}\}$ NMR spectrum of <b>3</b> in $\text{C}_6\text{D}_6$ .....                                          | S12 |
| <b>Figure S6.</b> $^1\text{H}$ NMR spectrum of <b>4</b> in $\text{C}_6\text{D}_6$ .....                                                           | S13 |
| <b>Figure S7.</b> Close-up of the $^1\text{H}$ NMR spectrum of <b>4</b> in $\text{C}_6\text{D}_6$ .....                                           | S14 |
| <b>Figure S8.</b> $^{31}\text{P}\{^1\text{H}\}$ NMR spectrum of <b>4</b> in $\text{C}_6\text{D}_6$ .....                                          | S14 |
| <b>Figure S9.</b> $^1\text{H}$ NMR spectrum of <b>5</b> in $\text{C}_6\text{D}_6$ .....                                                           | S15 |
| <b>Figure S10.</b> $^{13}\text{C}$ NMR spectrum of <b>5</b> in $\text{C}_6\text{D}_6$ .....                                                       | S15 |
| <b>Figure S11.</b> $^{31}\text{P}$ NMR spectrum of <b>5</b> in $\text{C}_6\text{D}_6$ .....                                                       | S16 |
| <b>Figure S12.</b> NMR spectra of the conversion of <b>5</b> (red) to <b>4</b> (blue).....                                                        | S16 |
| Computational Details.....                                                                                                                        | S17 |
| <b>Figure S13.</b> Computed enthalpy profile for the conversion of <b>1</b> into <b>3</b> and of <b>2</b> to <b>3<sup>Mes</sup></b> .....         | S18 |
| <b>Figure S14.</b> Computed enthalpy profile for the conversion of <b>5</b> into <b>4</b> on the singlet spin state potential energy surface..... | S19 |
| Coordinates for calculated structures.....                                                                                                        | S20 |
| <b>References</b> .....                                                                                                                           | S71 |

## Experimental

**General consideration.** All syntheses were carried out under inert atmosphere of nitrogen using standard Schlenk and glovebox techniques. All glassware used (including NMR tubes) were silylated with  $\text{Me}_3\text{SiCl}$ , at reduced pressure, inside of glass vacuum desiccator. 1,2-dimethoxyethane (Chem Impex) was distilled from a benzophenone-potassium still, stored over activated 4 Å sieves within the inert atmosphere box, and used within 10 days. Azidotrimethylsilane and  $\text{KN}(\text{SiMe}_3)_2$  (Aldrich) were used as received from the supplier.  $(\text{C}_5\text{Me}_5)_2\text{U}(\text{CH}_3)(\text{Cl})$ ,<sup>[1]</sup>  $(\text{C}_5\text{Me}_5)_2\text{U}(\text{CH}_3)(\text{I})$ ,<sup>[2]</sup> and  $\text{K}[\text{P}(\text{Mes})(\text{SiMe}_3)]$ <sup>[3]</sup> were synthesized according to literature procedure.  $\text{K}[\text{P}(\text{C}_6\text{H}_5)(\text{SiMe}_3)]$  was prepared from  $\text{HP}(\text{C}_6\text{H}_5)(\text{SiMe}_3)$ <sup>[4]</sup> and  $\text{KN}(\text{SiMe}_3)_2$  in toluene. Benzene- $d_6$  was dried over molecular sieves and degasses with three cycles of freeze-pump-thaw. All  $^1\text{H}$  and  $^{13}\text{C}$  NMR spectrum were collected either on Bruker Avance III 500 or 600 MHz spectrometer.  $^{31}\text{P}$  NMR spectrum were collected on Bruker AVII+ 300MHz spectrometer.  $^1\text{H}$  and  $^{13}\text{C}$  NMR chemical shifts were reported referenced internally to the residue solvent peak at 7.16 ppm ( $\text{C}_6\text{D}_5\text{H}$ ) and 128.06 ( $^{13}\text{C}_6\text{D}_6$ ).  $^{31}\text{P}$  NMR chemical shifts were reported referenced externally to  $\text{H}_3\text{PO}_4$  at 0 ppm. All heteronuclear NMR spectra were recorded proton-decoupled. Infrared spectra were recorded as a KBr pellets on Perkin-Elmer Spectrum One FT-IR spectrometer. Elemental analyses were performed by Microanalysis Facility, College of Chemistry, University of California, Berkeley.

**Synthesis of  $(C_5Me_5)_2U(CH_3)[P(C_6H_5)(SiMe_3)]$ , **1**.** To a scintillation vial charged with  $K[P(C_6H_5)(SiMe_3)]$  (40 mg, 0.18 mmol) and toluene (5 mL),  $(C_5Me_5)_2U(CH_3)(Cl)$  (100 mg, 0.18 mmol) in toluene (5 mL) was added. The solution was stirred at room temperature overnight, after which, it was filtered through Celite and the solvent was removed *in vacuo* to yield a dark brown solid (107 mg, 85%).  $^1H$  NMR ( $C_6D_6$ , 600 MHz, 298 K): 11.4 (s, 30H,  $C_5(CH_3)_5$ ,  $\nu_{1/2} = 11$  Hz), -4.21 (s, 1H, *p*-Ph,  $\nu_{1/2} = 14$  Hz), -5.35 (s, 2H, *m*-Ph,  $\nu_{1/2} = 14$  Hz), -14.6 (s, 9H,  $SiMe_3$ ,  $\nu_{1/2} = 8$  Hz), -35.6 (s, 2H, *p*-Ph,  $\nu_{1/2} = 38$  Hz), -190.2 (s, 3H,  $CH_3$ ,  $\nu_{1/2} = 144$  Hz). IR (KBr,  $cm^{-1}$ ): 2903 (vs), 2858 (s), 2725 (w), 1578 (m), 1473 (m), 1432 (br-m), 1378 (m), 1259 (w), 1242 (s), 1102 (s), 1081 (s), 1022 (s), 889 (w), 837 (vs), 747 (w), 726 (w), 693 (w), 629 (w). Anal. Calcd for  $C_{30}H_{47}PSiU$ : C, 51.13; H, 6.72. Found: C, 50.67; H, 6.26.

**Synthesis of  $(C_5Me_5)_2U(CH_3)[P(Mes)(SiMe_3)]$ , **2**.** Complex **2** was prepared in a manner similar to **1** using  $(C_5Me_5)_2U(CH_3)I$  (252 mg, 0.39 mmol) in toluene (3 mL) and  $KP[(Mes)(SiMe_3)]$  (102 mg, 0.39 mmol) in toluene (5 mL). Analytically pure sample of **2** was obtained after filtration through Celite and solvent removal (285 mg, 99%).  $^1H$  NMR ( $C_6D_6$ , 500 MHz, 298 K):  $\delta$  9.45 (s, 30H,  $C_5(CH_3)_5$ ,  $\nu_{1/2} = 7$  Hz), 2.46 (s, 2H, *m*-Mes,  $\nu_{1/2} = 2$  Hz), -0.20 (s, 3H,  $CH_3$ -*p*-Mes,  $\nu_{1/2} = 3$  Hz), -6.78 (s, 6H,  $CH_3$ -*o*-Mes,  $\nu_{1/2} = 10$  Hz), -14.3 (s, 9H,  $Si(CH_3)_3$ ,  $\nu_{1/2} = 8$  Hz), -125.0 (s, 3H, U- $CH_3$ ,  $\nu_{1/2} = 50$  Hz). IR (KBr,  $cm^{-1}$ ): 2949 (m), 2908 (s), 2867 (m), 1438 (m), 1376 (m), 1237 (m), 1102 (w), 1044 (w), 1020 (w), 936 (w), 880 (w), 836 (vs), 749 (w). Anal. Calcd for  $C_{33}H_{53}SiPU$ : C, 53.07; H, 7.15. Found: C, 52.91; H, 7.04.

**Synthesis of  $(C_5Me_5)_2U(CH_3)[-N=P(SiMe_3)_2(C_6H_5)]$ , **3**.** To a scintillation vial charged with **1** (148 mg, 0.21 mmol), diethyl ether (5 mL), and a stir bar, azidotrimethylsilane (38 mg, 0.33 mmol) was added. Gas evolution was observed immediately. The solution was allowed to stir at room

temperature overnight, after which the solvent was removed under vacuum to yield a dark yellow-brown powder. Recrystallization from a concentrated diethyl ether solution (-40 °C) yielded dark yellow crystals which were dried *in vacuo* (30 mg, 18%). X-ray quality crystals were obtained from a concentrated diethyl ether solution at -40 °C. <sup>1</sup>H NMR (C<sub>6</sub>D<sub>6</sub>, 500 MHz, 298 K): δ 23.7 (s, 2H, *o*-Ph,  $\nu_{1/2}$  = 18 Hz), 11.0 (s, 18H, SiMe<sub>3</sub>,  $\nu_{1/2}$  = 5 Hz), 9.12-9.09 (m, 1H, *p*-Ph), 8.88-8.87 (m, 2H, *m*-Ph), -1.83 (s, 30H, C<sub>5</sub>(CH<sub>3</sub>)<sub>5</sub>,  $\nu_{1/2}$  = 2 Hz), -194.4 (s, 3H, CH<sub>3</sub>,  $\nu_{1/2}$  = 85 Hz). <sup>31</sup>P{<sup>1</sup>H} NMR (C<sub>6</sub>D<sub>6</sub>, 120 MHz): δ 518.0. IR (KBr, cm<sup>-1</sup>): 2953 (m), 2901 (s), 2854 (m), 1436 (w), 1376 (w), 1246 (m), 1088 (m), 1046 (vs), 1023 (m), 933 (m), 882 (m), 839 (vs), 749 (w), 697 (w). Anal. Calcd for C<sub>33</sub>H<sub>56</sub>NPSi<sub>2</sub>U: C, 50.05; H, 7.13; N, 1.77. Found: C, 49.86; H, 6.91; N, 1.72.

**Synthesis of (C<sub>5</sub>Me<sub>5</sub>)<sub>2</sub>U( $\kappa^2$ -*N,N'*)-[N(SiMe<sub>3</sub>)<sub>2</sub>P(Mes), 4.** To a scintillation vial charged with **2** (250 mg, 0.33 mmol), 1,2-dimethoxyethane (7 mL), and a stir bar, azidotrimethylsilane (73 mg, 0.63 mmol) was added. Gas evolution was observed immediately. The solution was let to stir at room temperature overnight, after which the solvent was removed *in vacuo* to yield a dark red-brown solid. Recrystallization from a concentrated diethyl ether solution (-40 °C) yielded dark red crystals which were dried *in vacuo* (175 mg, 66%). X-ray quality crystals were obtained over several days from a concentrated diethyl ether solution at -40 °C. <sup>1</sup>H NMR (C<sub>6</sub>D<sub>6</sub>, 500 MHz, 298 K): 33.7 (s, 3H, CH<sub>3</sub>-Mes,  $\nu_{1/2}$  = 15 Hz), 12.0 (s, 1H, CH-Mes,  $\nu_{1/2}$  = 4 Hz), 10.7 (s, 15H, C<sub>5</sub>Me<sub>5</sub>,  $\nu_{1/2}$  = 5 Hz), 7.98 (s, 1H, CH-Mes,  $\nu_{1/2}$  = 7 Hz), 5.66 (s, 3H, CH<sub>3</sub>-Mes,  $\nu_{1/2}$  = 10 Hz), 5.01 (s, 15H, C<sub>5</sub>Me<sub>5</sub>,  $\nu_{1/2}$  = 4 Hz), 3.70 (s, 3H, CH<sub>3</sub>-Mes,  $\nu_{1/2}$  = 4 Hz), -21.2 (s, 18H, SiMe<sub>3</sub>,  $\nu_{1/2}$  = 29 Hz). <sup>31</sup>P{<sup>1</sup>H} NMR (C<sub>6</sub>D<sub>6</sub>, 120 MHz): δ -180.8. IR (KBr, cm<sup>-1</sup>): 2949 (m), 2904 (br-m), 2856 (w), 1437 (br-w), 1376 (w), 1244 (s), 1083 (br-w), 1021 (br-w), 954 (w), 891 (s), 837 (vs), 765 (w), 689 (w), 668 (m). Anal. Calcd for C<sub>35</sub>H<sub>59</sub>N<sub>2</sub>PSi<sub>2</sub>U: C, 50.48; H, 7.14; N, 3.48. Found: C, 50.30; H, 7.27; N, 3.17.

**Synthesis of  $(C_5Me_5)_2U\{=N[P(SiMe_3)(Mes)]\}=[N(SiMe_3)]$ , **5**.** To a 20 mL scintillation vial, 144 mg (0.193 mmol) of crystalline **3** was added and dissolved in ca. 5 mL of 1,2-dimethoxyethane. The solution was cooled to  $-45\text{ }^\circ\text{C}$  and 2.5 mL of a 178 mM (0.443 mmol)  $Me_3SiN_3$  in *n*-pentane solution was added dropwise over the course of one minute. The reaction mixture darkened instantly, and the reaction was allowed to warm for 5 minutes, after which volatiles are removed under reduced pressure. The solution was recrystallized from diethyl ether at  $-45\text{ }^\circ\text{C}$  yielding 7.7 mg (0.0091 mmol) of analytically pure crystalline **5**. Further crystallizations gave greater yields, but with less pure product. X-ray quality crystals were grown from a saturated solution of diethyl ether at  $-45\text{ }^\circ\text{C}$ .  $^1\text{H}$  NMR (600 MHz,  $25\text{ }^\circ\text{C}$ , benzene- $d_6$ ):  $\delta$  1.03 9H (s, SiMe<sub>3</sub>), 1.17 9H (s, SiMe<sub>3</sub>), 3.14 3H (s, p-Me), 4.06 6H (s, o-Me), 4.67 30H (s, C<sub>5</sub>Me<sub>5</sub>), 8.13 2H (s, m C-H).  $^{13}\text{C}\{^1\text{H}\}$  (600 MHz,  $25\text{ }^\circ\text{C}$ , benzene- $d_6$ ):  $\delta$  7.80 (C<sub>5</sub>Me<sub>5</sub>), 9.11 (SiMe<sub>3</sub>), 13.77 (p-Me), 20.47 (SiMe<sub>3</sub>), 32.72 (o-Me), 132.66 (m-CH), 137.47 (C<sub>5</sub>Me<sub>5</sub>), 140.72 (p-C), 165.31 (o-C), 178.04 (P-C).  $^{31}\text{P}\{^1\text{H}\}$  (300 MHz,  $25\text{ }^\circ\text{C}$ , benzene- $d_6$ ):  $\delta$  157. IR (KBr,  $\text{cm}^{-1}$ ): 2957 (w), 2899 (w), 2853 (w), 1603 (wb), 1436 (w), 1374 (w), 1260 (s), 1089 (vs), 1020 (s), 953 (s), 830 (s), 802 (s), 468 (w). Since **4** and **5** are structural isomers, their elemental analyses cannot be distinguished.

**Synthesis of **4** from **5**.** 7.7 mg of **5** was dissolved in benzene- $d_6$  and 1,2-dimethoxyethane (ca. 2 mL) was added to a 20 mL scintillation vial. No immediate reaction was observed, but, after 48 h, volatiles were removed and the now red powder was dissolved in benzene- $d_6$ , which showed conversion to **4**.

**Crystallographic Data Collection and Structure Determination.** The selected single crystal was coated with viscous hydrocarbon oil inside the glove box before being mounted on a nylon cryoloop using Parabar<sup>®</sup> hydrocarbon oil. The X-ray data were collected on a Bruker D8 Phaser diffractometer equipped with a Photon 100 CMOS area detector using Mo-K $\alpha$  radiation ( $\lambda =$

0.71073 Å) from a microfocus source. The data collection and processing utilized Bruker Apex3 suite of programs.<sup>[5]</sup> The structures were solved using an iterative dual space method as implemented in SHELXT and refined by full-matrix least-squares methods on  $F^2$  using Bruker SHELX-2017/1 program.<sup>[6]</sup> All non-hydrogen atoms were refined with anisotropic displacement parameters. Hydrogen atoms were placed at calculated positions and included in the refinement using a riding model. Thermal ellipsoid plots were prepared by using Olex2<sup>[7]</sup> with 50% of probability displacements for non-hydrogen atoms.

The structure of **5** appears to be affected by twinning related to the presence of a pseudo-monoclinic supercell related by a transformation represented with the following 3x3 matrix: [(1 0 0) (2 2 0) (2 2 1)]. An attempt to solve the structure using the supercell as the unit cell resulted in an uninterpretable model. No twin matrix could be found, and introducing twin laws based for 2-fold rotation about  $a$  or reflection perpendicular to  $a$  (which is parallel to the special axis of the monoclinic supercell) failed to improve the model. The major consequence of this twinning is that atom C32 in the phenyl ring cannot be refined anisotropically. Attempting an anisotropic refinement of this atom inevitably results in it shifting severely out of the ring to occupy the position of a nearby major electron density difference peak. Modeling this peak as a uranium atom at 10% occupancy (and reducing the occupancy of U1 to 90%) allows C32 to be refined anisotropically but creates a number of other problems including highly unrealistic thermal ellipsoids for both U atoms and serious difference map peaks and holes. Separating the refinement of C32 from other parameters via the BLOC instruction does not improve the refinement. Ultimately, the best interpretation of this data set was found to be the presented model with all non-hydrogen atoms except C32 refined anisotropically with restraints added to all light atoms to enforce chemically reasonable thermal motion. This results in a model with no geometric restraints

that is chemically reasonable and fully consistent all other experimental results, particularly the conversion between its structurally characterized isomer **4**. We further note that any substitution or elimination at the position of C32 is incredibly unlikely as it would require breaking an aromatic ring.

**Table S1.** Crystallographic parameters for complexes **3-5**.

|                               | <b>3</b>                                            | <b>4</b>                                                          | <b>5</b>                                                          |
|-------------------------------|-----------------------------------------------------|-------------------------------------------------------------------|-------------------------------------------------------------------|
| <b>CCDC deposit number</b>    | 1826643                                             | 1826642                                                           | 1995730                                                           |
| <b>Empirical formula</b>      | C <sub>33</sub> H <sub>56</sub> NPSi <sub>2</sub> U | C <sub>35</sub> H <sub>59</sub> N <sub>2</sub> PSi <sub>2</sub> U | C <sub>35</sub> H <sub>59</sub> N <sub>2</sub> PSi <sub>2</sub> U |
| <b>Formula weight (g/mol)</b> | 791.96                                              | 833.02                                                            | 833.02                                                            |
| <b>Crystal habit, color</b>   | Prism, Dark Yellow                                  | Prism, Dark Red                                                   | Prism, Black                                                      |
| <b>Temperature (K)</b>        | 100(2)                                              | 100(2)                                                            | 100(2)                                                            |
| <b>Space group</b>            | <i>P</i> -1                                         | <i>Cc</i>                                                         | <i>P</i> -1                                                       |
| <b>Crystal system</b>         | Triclinic                                           | Monoclinic                                                        | Triclinic                                                         |
| <b>Volume (Å<sup>3</sup>)</b> | 3573.6(3)                                           | 3661.7(4)                                                         | 1849.0(4)                                                         |
| <b>a (Å)</b>                  | 10.6409(6)                                          | 20.0922(13)                                                       | 9.8231(11)                                                        |
| <b>b (Å)</b>                  | 16.5027(9)                                          | 11.4805(6)                                                        | 11.2078(13)                                                       |
| <b>c (Å)</b>                  | 20.4856(11)                                         | 18.3590(11)                                                       | 19.039(3)                                                         |
| <b>α (°)</b>                  | 85.363(2)                                           | 90                                                                | 82.061(4)                                                         |
| <b>β (°)</b>                  | 89.696(2)                                           | 120.155(3)                                                        | 76.900(6)                                                         |
| <b>γ (°)</b>                  | 85.317(2)                                           | 90                                                                | 65.055(4)                                                         |



|                                                 |                                                      |                                                      |                                                      |
|-------------------------------------------------|------------------------------------------------------|------------------------------------------------------|------------------------------------------------------|
| <b>Z</b>                                        | 4                                                    | 4                                                    | 2                                                    |
| <b>Calculated density (Mg/m<sup>3</sup>)</b>    | 1.472                                                | 1.511                                                | 1.494                                                |
| <b>Absorption coefficient (mm<sup>-1</sup>)</b> | 4.675                                                | 4.567                                                | 4.522                                                |
| <b>Final R indices [I &gt; 2σ(I)]</b>           | R <sub>1</sub> = 0.0391,<br>wR <sub>2</sub> = 0.0667 | R <sub>1</sub> = 0.0224,<br>wR <sub>2</sub> = 0.0392 | R <sub>1</sub> = 0.0715,<br>wR <sub>2</sub> = 0.2236 |

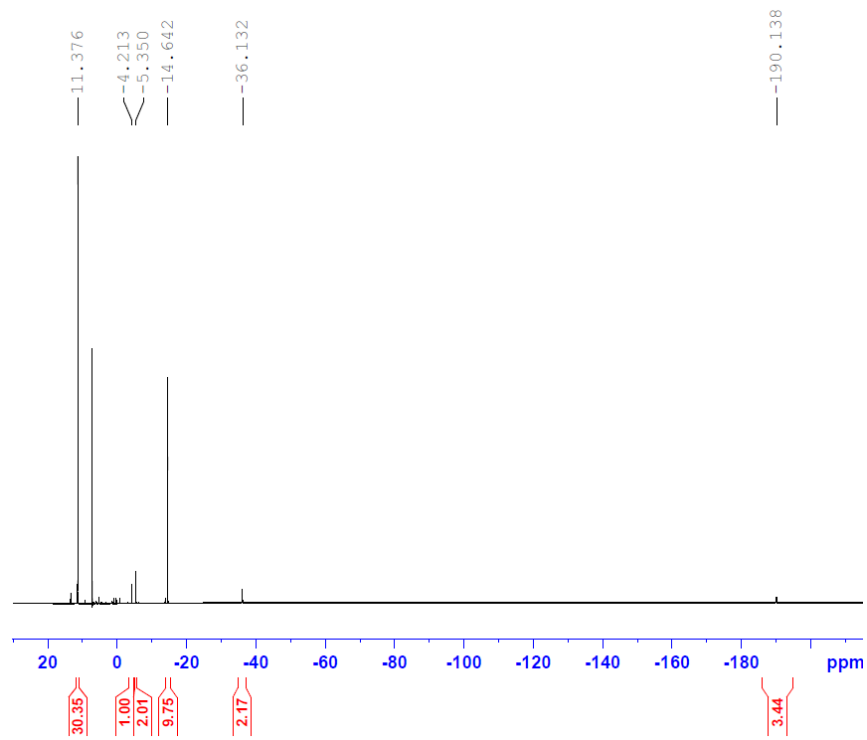

**Figure S1.**  $^1\text{H}$  NMR spectrum of **1** in  $\text{C}_6\text{D}_6$ .

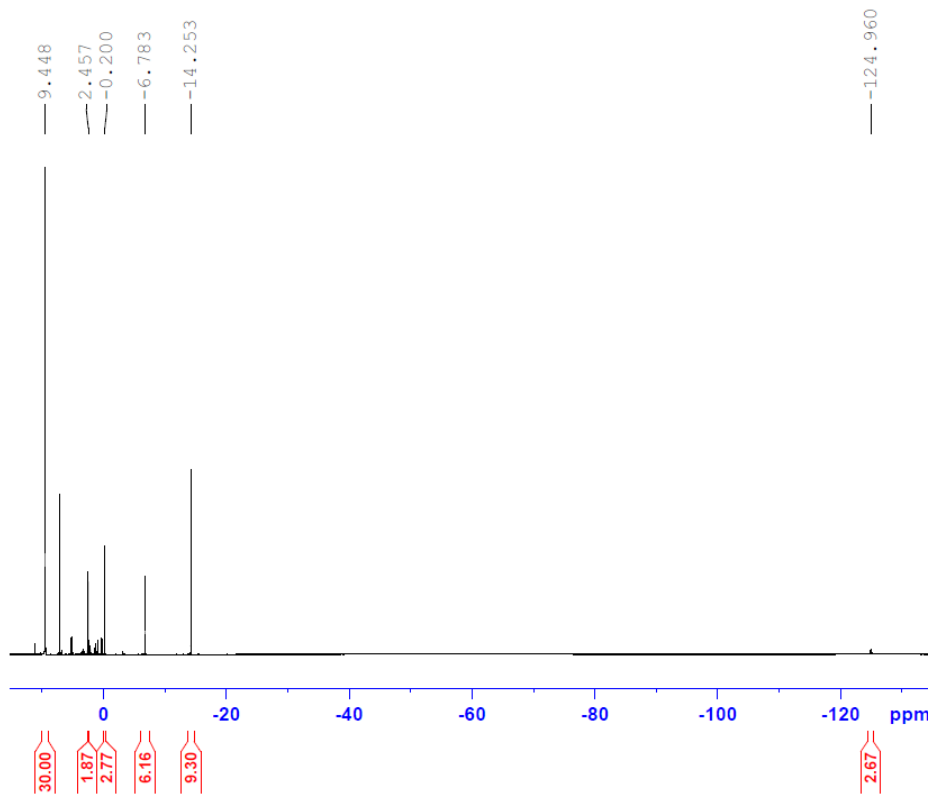

**Figure S2.**  $^1\text{H}$  NMR spectrum of **2** in  $\text{C}_6\text{D}_6$ .

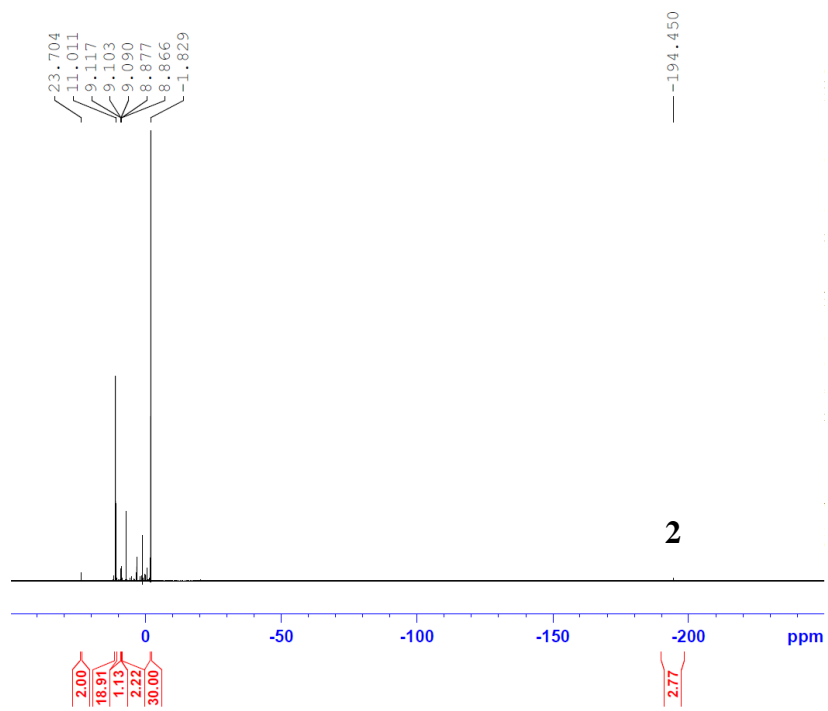

Figure S3.  $^1\text{H}$  NMR spectrum of **3** in  $\text{C}_6\text{D}_6$ .

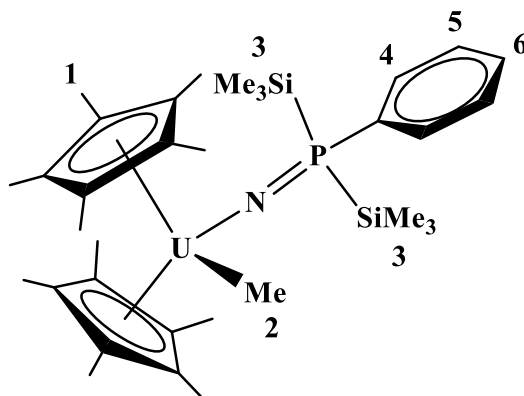

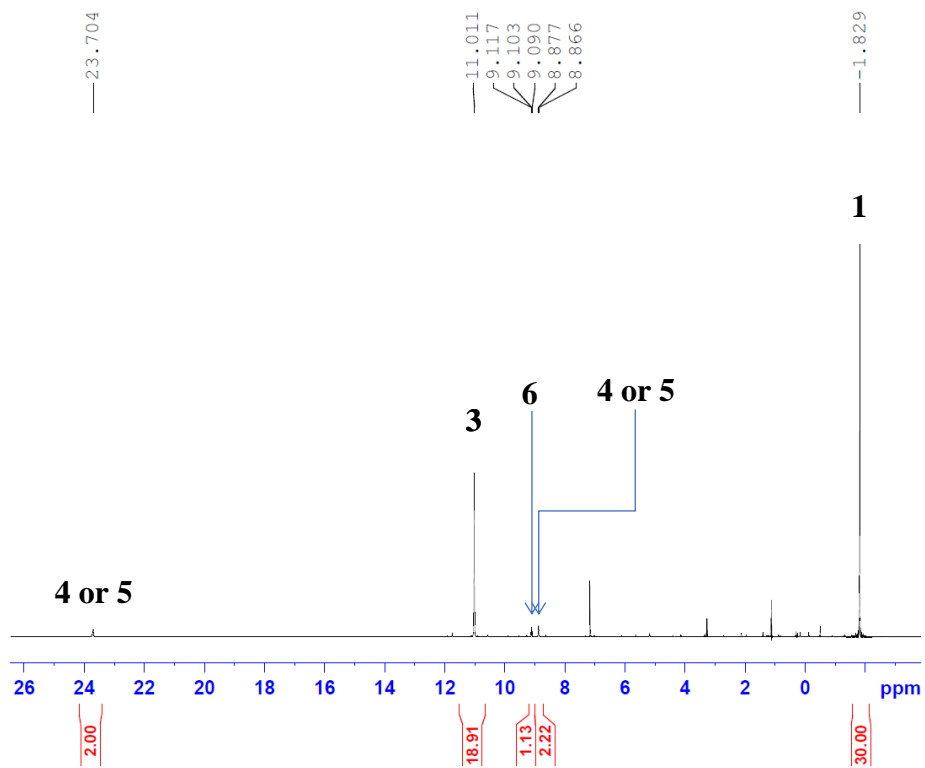

**Figure S4.** Close-up of the  $^1\text{H}$  NMR spectrum of **3** in  $\text{C}_6\text{D}_6$ .

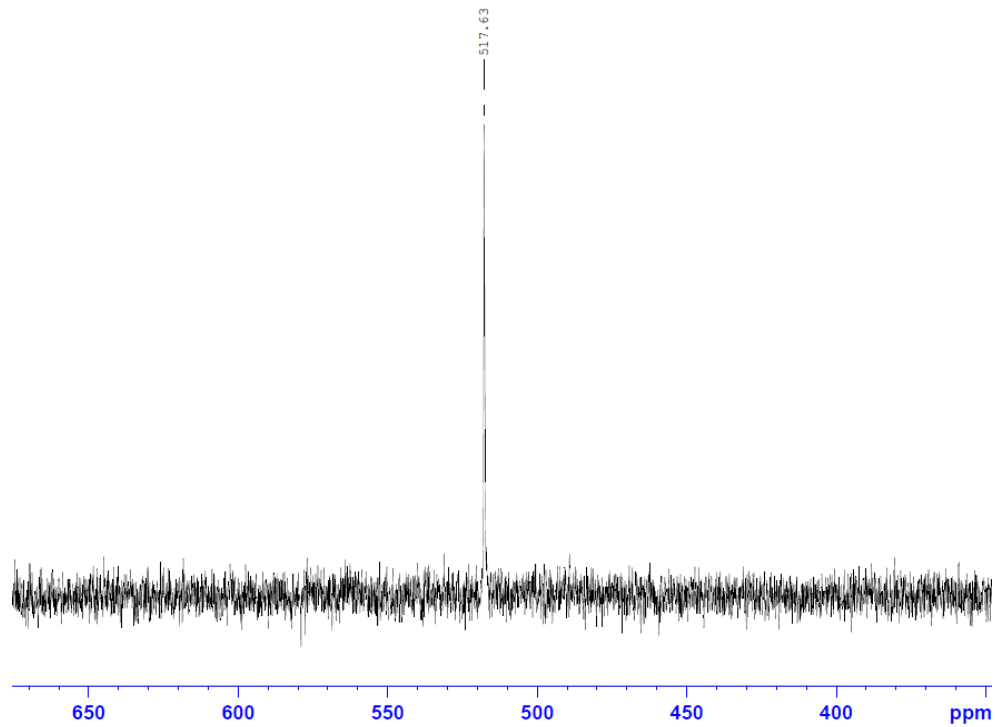

**Figure S5.**  $^{31}\text{P}\{^1\text{H}\}$  NMR spectrum of **3** in  $\text{C}_6\text{D}_6$ .

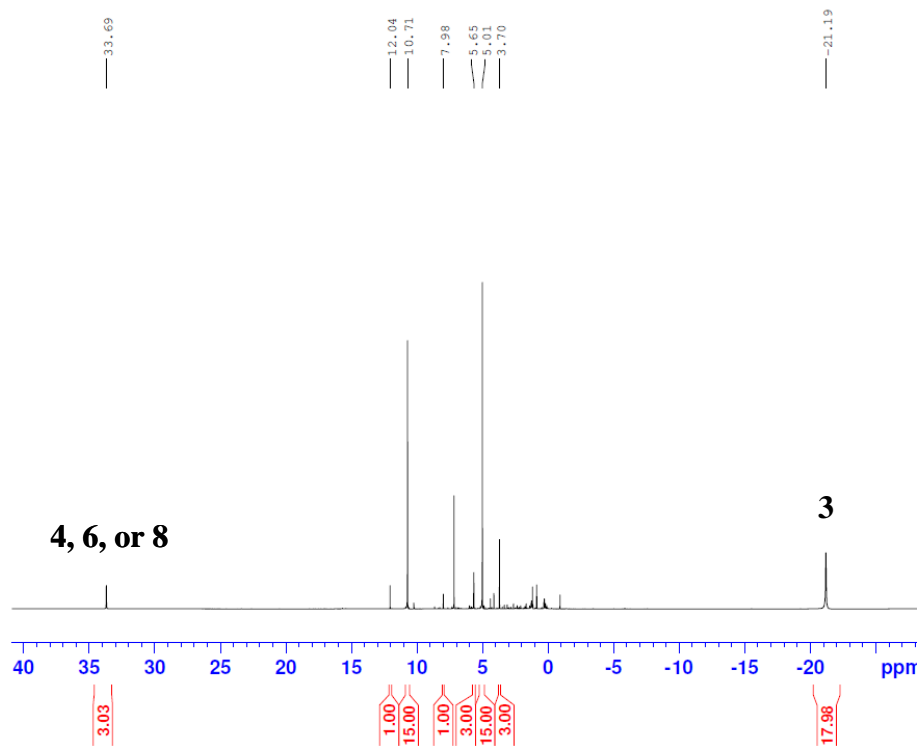

Figure S6.  $^1\text{H}$  NMR spectrum of **4** in  $\text{C}_6\text{D}_6$ .

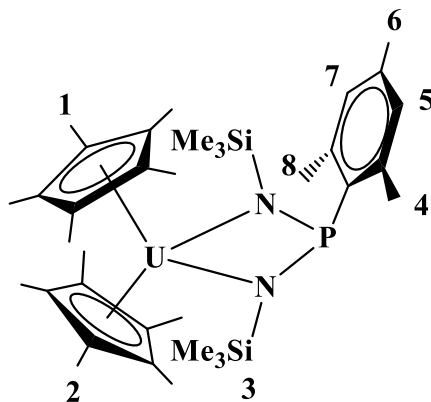

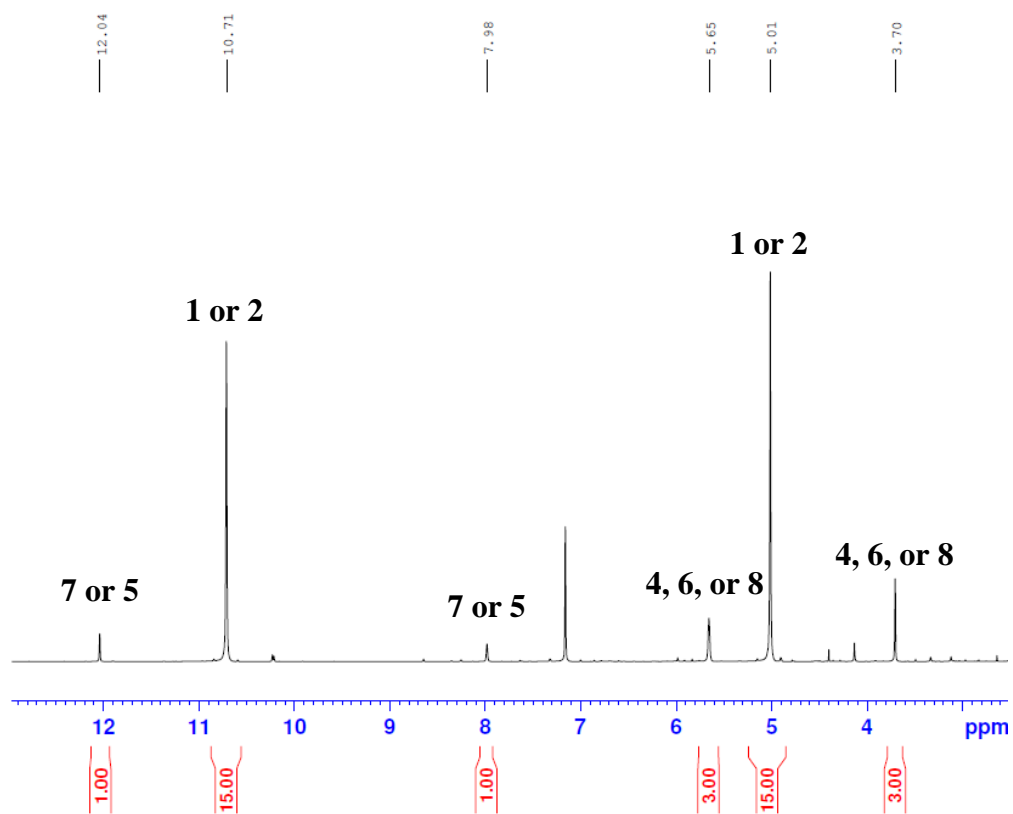

**Figure S7.** Close-up of the  $^1\text{H}$  NMR spectrum of **4** in  $\text{C}_6\text{D}_6$ .

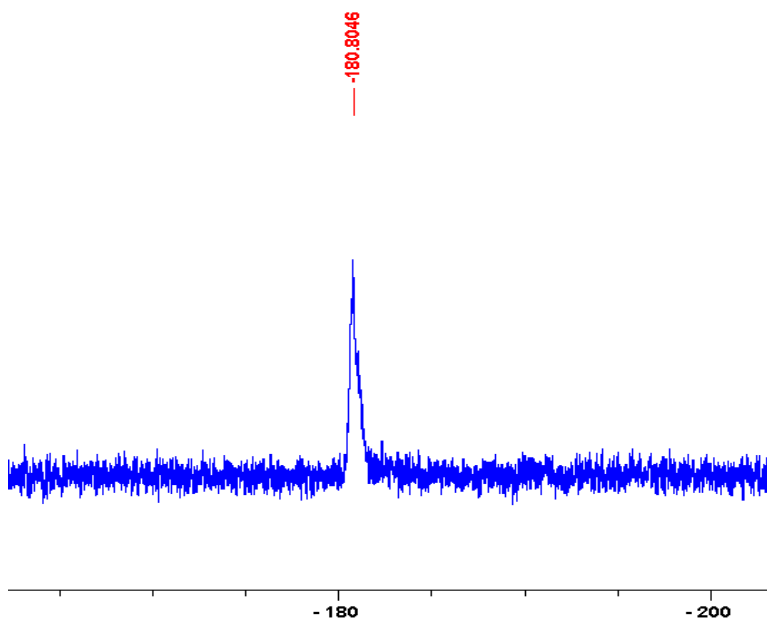

**Figure S8.**  $^{31}\text{P}$  NMR spectrum of **4** in  $\text{C}_6\text{D}_6$ .

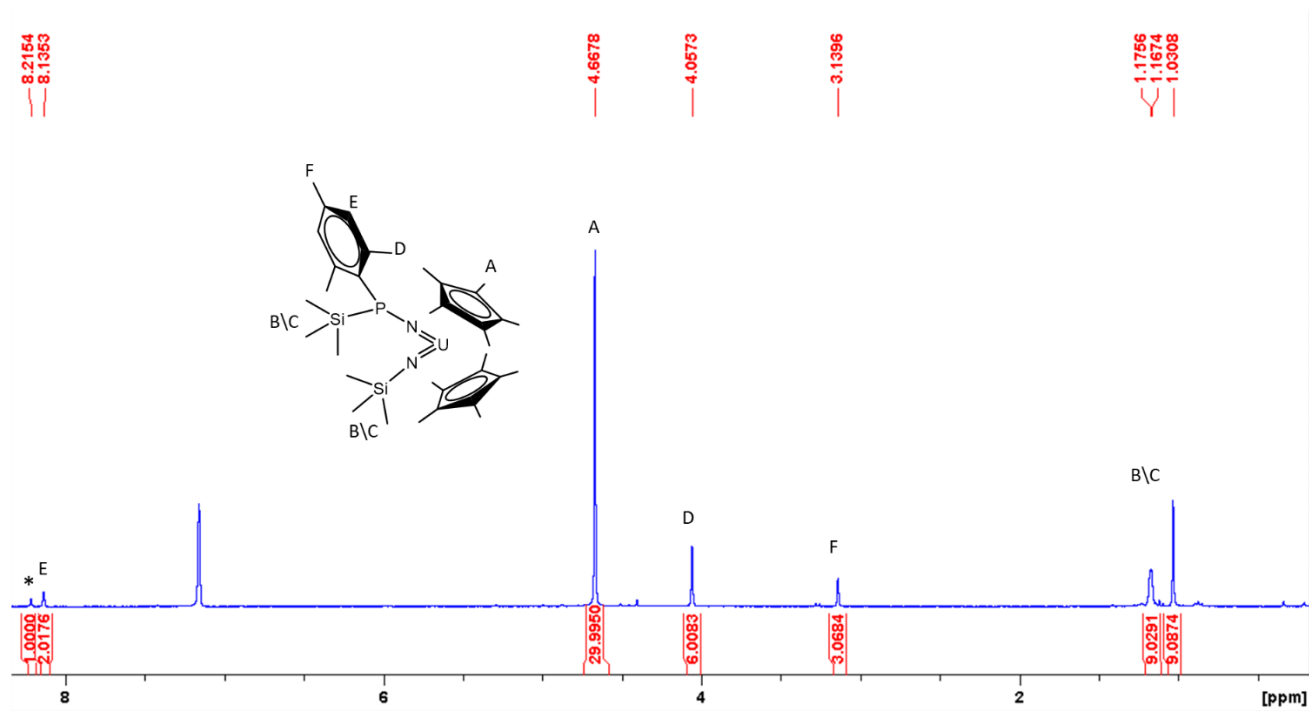

**Figure S9.**  $^1\text{H}$  NMR spectrum of **5** in  $\text{C}_6\text{D}_6$ .

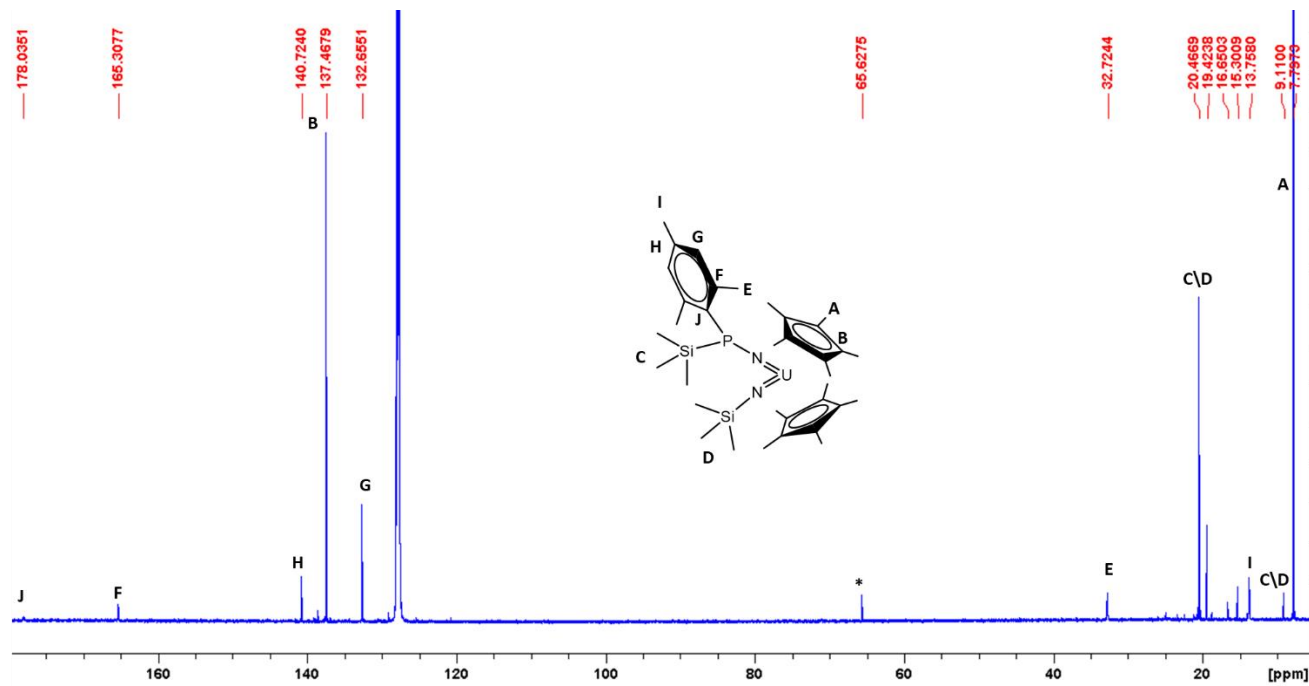

**Figure S10.**  $^{13}\text{C}$  NMR spectrum of **5** in  $\text{C}_6\text{D}_6$ .

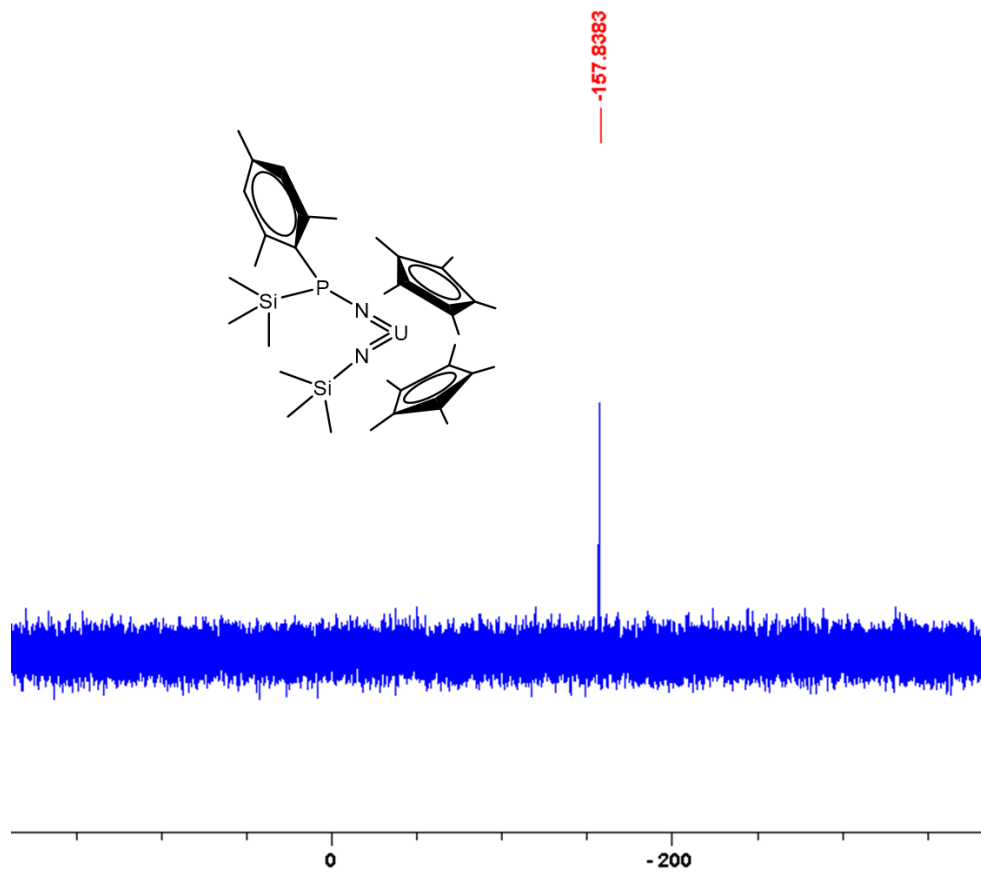

**Figure S11.**  $^{31}\text{P}$  NMR spectrum of **5** in  $\text{C}_6\text{D}_6$ .

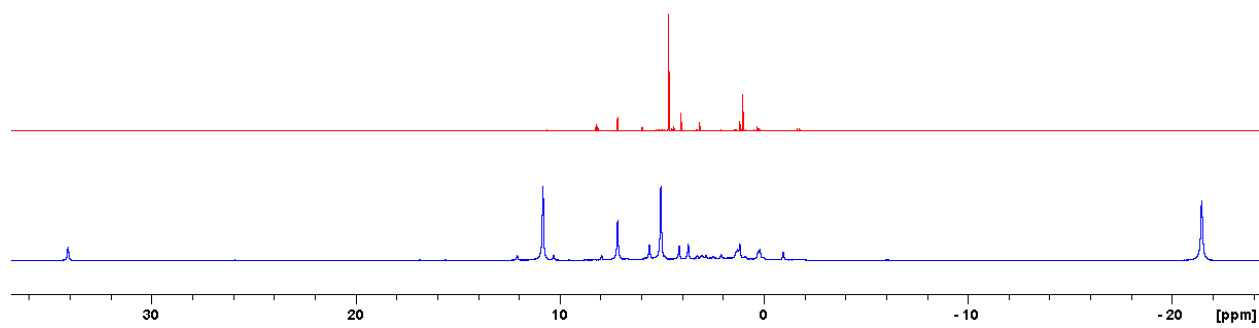

**Figure S12.** NMR spectra of the conversion of **5** (red) to **4** (blue).



**Computational details.** All DFT calculations were carried out with the Gaussian 09 suite of programs.<sup>[8]</sup> Geometries were fully optimized in gas phase without symmetry constraints, employing the B3PW91 functional.<sup>[9]</sup> The nature of the extrema was verified by analytical frequency calculations. The calculation of electronic energies and enthalpies of the extrema of the potential energy surface (minima and transition states) were performed at the same level of theory as the geometry optimizations. IRC calculations were performed to confirm the connections of the optimized transition states. The effect of a possible assistance of a solvent molecule (DME) during the formation of complex **4** from complex **5** was considered. However, no difference is observed with or without an explicit solvent molecule in interaction with the silicon atom of the SiMe<sub>3</sub> group. The abstraction of this same group by the solvent has also been envisaged. In this case, both from a kinetic and thermodynamic point of view, the reaction is not possible. Uranium atoms were treated with a small core effective core potential (60 MWB), associated with its adapted basis set.<sup>[10]</sup> Stuttgart effective core potentials<sup>[11]</sup> and their associated basis set were used for silicon augmented by a set of polarization functions ( $\zeta_d = 0.284$ ). For the other elements (H, C, N and P), Pople's double- $\zeta$  basis set 6-31G(d,p) was used.<sup>[12]</sup> The electronic charges (at the DFT level) were computed using the natural population analysis (NPA) technique.<sup>[13]</sup>

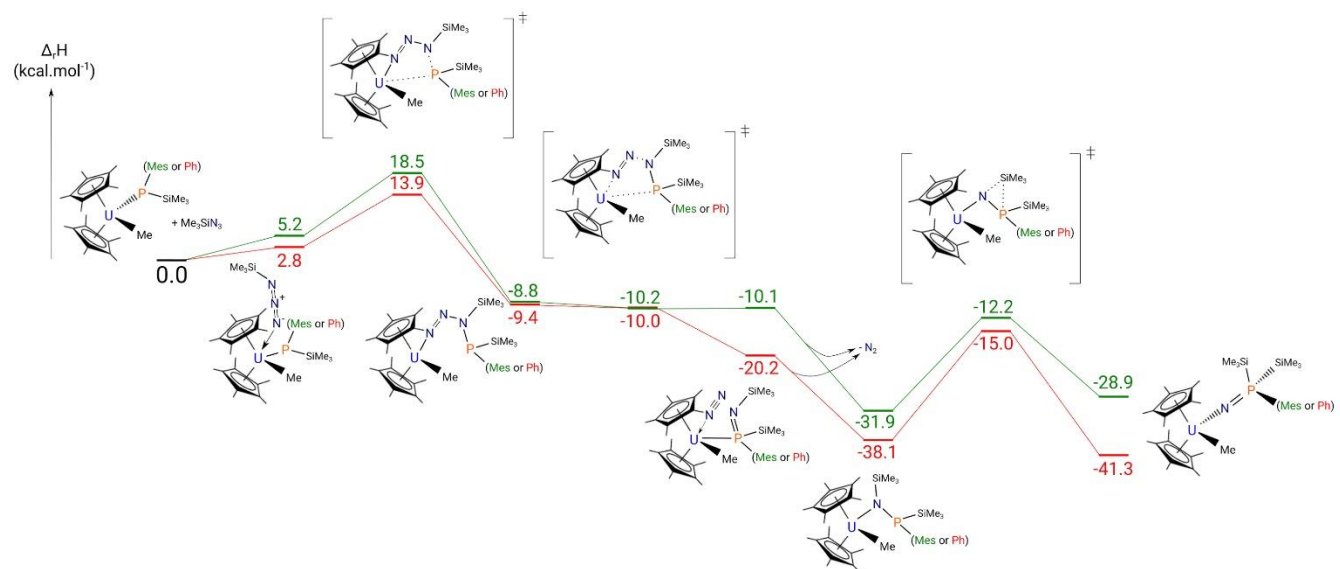

**Figure S13.** Computed enthalpy profile for the conversion of **1** into **3** and of **2** to **3<sup>Mes</sup>**

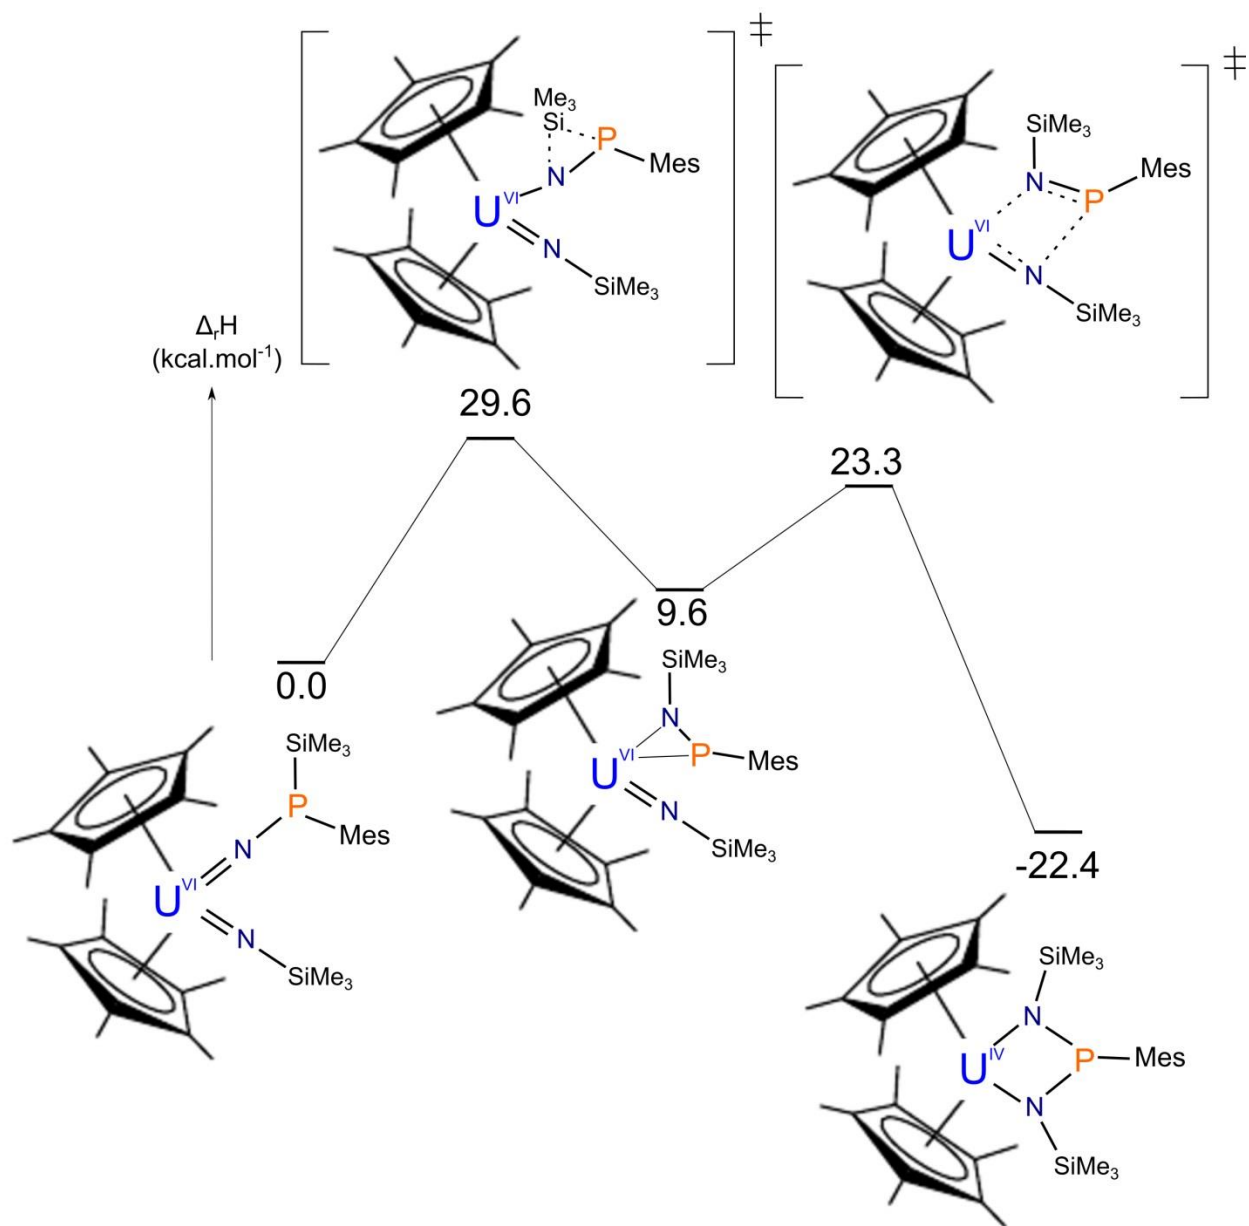

**Figure S14.** Computed enthalpy profile for the conversion of **5** into **4** on the singlet spin state potential energy surface.

## Coordinates for calculated structures.

100

Complex 5

|    |          |          |          |
|----|----------|----------|----------|
| C  | 5.24914  | 7.84869  | 6.75090  |
| C  | 4.33689  | 8.72294  | 7.34668  |
| C  | 4.53249  | 9.23984  | 8.62758  |
| C  | 5.68256  | 8.85210  | 9.31241  |
| C  | 6.62926  | 7.98647  | 8.75459  |
| C  | 6.41765  | 7.46775  | 7.45234  |
| P  | 7.72220  | 6.33701  | 6.76666  |
| N  | 8.00627  | 6.67224  | 5.12535  |
| U  | 8.80067  | 7.41845  | 3.48639  |
| N  | 7.95361  | 9.14527  | 3.37522  |
| Si | 7.15770  | 10.72487 | 3.51531  |
| C  | 5.29830  | 10.63515 | 3.13566  |
| C  | 7.83449  | 7.63739  | 9.59371  |
| C  | 3.54912  | 10.20396 | 9.23547  |
| C  | 4.95707  | 7.34232  | 5.36857  |
| Si | 6.83532  | 4.24166  | 7.11233  |
| C  | 5.08652  | 3.82252  | 6.49531  |
| C  | 7.33031  | 11.38821 | 5.28311  |
| C  | 7.89696  | 11.97350 | 2.28872  |
| C  | 8.08797  | 2.99865  | 6.41182  |
| C  | 6.80461  | 4.06597  | 9.00469  |
| C  | 6.91689  | 6.72110  | 1.58964  |
| C  | 7.27155  | 5.48551  | 2.19927  |
| C  | 8.59337  | 5.15225  | 1.78663  |
| C  | 9.04398  | 6.17162  | 0.89829  |
| C  | 8.02163  | 7.15708  | 0.80230  |
| C  | 10.23207 | 6.09223  | -0.01198 |
| C  | 9.27737  | 3.84881  | 2.07921  |
| C  | 6.34018  | 4.57006  | 2.93066  |
| C  | 5.54761  | 7.32731  | 1.57699  |
| C  | 8.03730  | 8.34731  | -0.10974 |
| C  | 10.76324 | 8.31284  | 5.19611  |
| C  | 11.12640 | 6.95010  | 4.98181  |
| C  | 11.58426 | 6.82330  | 3.64200  |
| C  | 11.50241 | 8.10895  | 3.02435  |
| C  | 11.01053 | 9.02842  | 3.99120  |
| C  | 12.28297 | 5.61307  | 3.09852  |
| C  | 11.21612 | 5.88593  | 6.03199  |
| C  | 12.06591 | 8.51123  | 1.69270  |
| C  | 10.38500 | 8.91577  | 6.51425  |
| C  | 11.00172 | 10.51576 | 3.81974  |
| H  | 10.45679 | 6.01857  | 6.80766  |
| H  | 12.20117 | 5.90519  | 6.51896  |
| H  | 11.08649 | 4.88421  | 5.61047  |
| H  | 11.81043 | 4.67941  | 3.41622  |
| H  | 13.32010 | 5.58043  | 3.45941  |

|   |          |          |          |
|---|----------|----------|----------|
| H | 12.32680 | 5.61057  | 2.00738  |
| H | 10.30849 | 3.84221  | 1.71927  |
| H | 8.75790  | 3.01495  | 1.58851  |
| H | 9.30145  | 3.61754  | 3.15033  |
| H | 10.75398 | 10.80597 | 2.79579  |
| H | 11.99344 | 10.93236 | 4.04578  |
| H | 10.28671 | 11.00133 | 4.48638  |
| H | 6.85645  | 3.98266  | 3.69308  |
| H | 5.87133  | 3.86073  | 2.23400  |
| H | 5.53712  | 5.12229  | 3.42269  |
| H | 11.28157 | 9.17487  | 7.09400  |
| H | 9.79413  | 8.21803  | 7.11322  |
| H | 9.79736  | 9.82885  | 6.39387  |
| H | 10.62948 | 7.07722  | -0.26747 |
| H | 9.94273  | 5.61293  | -0.95742 |
| H | 11.04747 | 5.49705  | 0.40526  |
| H | 12.37476 | 7.64707  | 1.10194  |
| H | 12.95317 | 9.14400  | 1.82735  |
| H | 11.35768 | 9.09150  | 1.08980  |
| H | 7.36806  | 9.13357  | 0.24738  |
| H | 7.71706  | 8.07609  | -1.12522 |
| H | 9.03670  | 8.78527  | -0.19712 |
| H | 5.00986  | 7.16494  | 2.51394  |
| H | 4.94158  | 6.88319  | 0.77520  |
| H | 5.58451  | 8.40320  | 1.40247  |
| H | 6.93346  | 10.66731 | 6.00425  |
| H | 6.76799  | 12.32281 | 5.39216  |
| H | 8.37117  | 11.59658 | 5.54720  |
| H | 8.93276  | 12.22647 | 2.52918  |
| H | 7.31294  | 12.90104 | 2.30613  |
| H | 7.87105  | 11.58316 | 1.26628  |
| H | 5.09860  | 10.44736 | 2.07651  |
| H | 4.84125  | 11.59935 | 3.38817  |
| H | 4.79509  | 9.86312  | 3.72315  |
| H | 8.17467  | 3.07531  | 5.32453  |
| H | 7.78478  | 1.97418  | 6.65475  |
| H | 9.07871  | 3.17219  | 6.84251  |
| H | 7.77559  | 6.61733  | 9.98792  |
| H | 7.91347  | 8.31498  | 10.44893 |
| H | 8.76207  | 7.69456  | 9.01801  |
| H | 7.80133  | 4.19103  | 9.43771  |
| H | 6.44239  | 3.06728  | 9.27452  |
| H | 6.13265  | 4.79931  | 9.46086  |
| H | 5.85805  | 9.23858  | 10.31495 |
| H | 4.35220  | 4.53692  | 6.87913  |
| H | 4.81216  | 2.82825  | 6.86834  |
| H | 5.01480  | 3.80247  | 5.40551  |
| H | 3.76657  | 11.23468 | 8.92861  |
| H | 3.58259  | 10.17569 | 10.32861 |
| H | 2.52437  | 9.98275  | 8.92097  |
| H | 3.93238  | 7.58422  | 5.07059  |
| H | 5.08920  | 6.25918  | 5.30896  |

|                          |          |          |          |
|--------------------------|----------|----------|----------|
| H                        | 5.65027  | 7.77911  | 4.64348  |
| H                        | 3.44196  | 9.00095  | 6.79232  |
| 100                      |          |          |          |
| U(IV) TS P-Si activation |          |          |          |
| C                        | -0.45614 | -1.27482 | 2.64451  |
| C                        | -0.79721 | 0.06964  | 2.96336  |
| C                        | -2.17158 | 0.26739  | 2.65110  |
| C                        | -2.68715 | -0.97009 | 2.16118  |
| C                        | -1.62527 | -1.91401 | 2.14292  |
| C                        | 0.06639  | 1.00397  | 3.75620  |
| C                        | -2.96359 | 1.49594  | 2.99120  |
| C                        | -4.12980 | -1.34714 | 2.00101  |
| C                        | -1.79311 | -3.37730 | 1.86773  |
| C                        | 0.82376  | -1.95209 | 3.02962  |
| U                        | -0.86556 | -0.13402 | 0.14891  |
| N                        | -0.04781 | -1.72787 | -0.56274 |
| Si                       | 0.69561  | -3.20851 | -1.17898 |
| C                        | -0.63099 | -4.46511 | -1.70930 |
| N                        | 0.97575  | 1.06262  | 0.24699  |
| Si                       | 1.96103  | 2.97915  | 0.96597  |
| C                        | 2.98271  | 3.51346  | 2.49280  |
| P                        | 2.43800  | 0.64756  | 0.94718  |
| C                        | 3.82171  | 0.23036  | -0.19794 |
| C                        | 3.80081  | 0.20411  | -1.61434 |
| C                        | 4.95790  | -0.15541 | -2.31054 |
| C                        | 6.14806  | -0.48664 | -1.66342 |
| C                        | 6.15679  | -0.46021 | -0.26739 |
| C                        | 5.02771  | -0.11734 | 0.47496  |
| C                        | 2.57585  | 0.55806  | -2.40845 |
| C                        | 7.38718  | -0.84067 | -2.43980 |
| C                        | 5.14105  | -0.14277 | 1.98229  |
| C                        | 1.81513  | -4.05136 | 0.10600  |
| C                        | 1.80921  | -2.90431 | -2.68662 |
| C                        | 0.27849  | 3.81094  | 1.20277  |
| C                        | 2.79396  | 3.70587  | -0.57040 |
| C                        | -2.54990 | 1.83097  | -1.13955 |
| C                        | -1.52274 | 1.48508  | -2.06320 |
| C                        | -1.73059 | 0.13490  | -2.46491 |
| C                        | -2.88464 | -0.35471 | -1.78439 |
| C                        | -3.40610 | 0.70549  | -0.99183 |
| C                        | -0.56054 | 2.44812  | -2.69167 |
| C                        | -2.87276 | 3.20696  | -0.63328 |
| C                        | -4.78818 | 0.78668  | -0.41793 |
| C                        | -3.53752 | -1.68355 | -2.03013 |
| C                        | -1.02970 | -0.56999 | -3.58648 |
| H                        | -0.12584 | 3.13993  | -1.96557 |
| H                        | -1.06679 | 3.05269  | -3.45664 |
| H                        | 0.26340  | 1.92966  | -3.18451 |
| H                        | 1.28982  | -2.38464 | -3.49554 |
| H                        | 2.15123  | -3.87120 | -3.07487 |
| H                        | 2.69503  | -2.32344 | -2.41510 |
| H                        | -4.21591 | -1.96177 | -1.21841 |

|   |          |          |          |
|---|----------|----------|----------|
| H | -2.80139 | -2.48536 | -2.12942 |
| H | -4.13287 | -1.66927 | -2.95335 |
| H | -5.23615 | -0.19477 | -0.25700 |
| H | -5.44086 | 1.32314  | -1.12136 |
| H | -4.82901 | 1.33865  | 0.52535  |
| H | 1.00226  | -2.85092 | 2.43843  |
| H | 0.79550  | -2.25192 | 4.08674  |
| H | 1.68835  | -1.29508 | 2.89807  |
| H | 3.73189  | 3.20018  | -0.81327 |
| H | 3.02063  | 4.75841  | -0.36155 |
| H | 2.14013  | 3.67021  | -1.44482 |
| H | 2.61493  | 3.03915  | 3.40703  |
| H | 2.91136  | 4.60092  | 2.62088  |
| H | 4.03632  | 3.24662  | 2.36940  |
| H | 2.32396  | 1.61432  | -2.28961 |
| H | 1.70546  | -0.00981 | -2.07405 |
| H | 2.74063  | 0.36372  | -3.47222 |
| H | -4.78943 | -0.47882 | 2.01038  |
| H | -4.43756 | -1.99421 | 2.83357  |
| H | -4.32528 | -1.90830 | 1.08160  |
| H | 0.02317  | -0.28823 | -3.66235 |
| H | -1.50222 | -0.32670 | -4.54840 |
| H | -1.07177 | -1.65468 | -3.46724 |
| H | -3.81712 | 3.56280  | -1.06760 |
| H | -2.10487 | 3.93229  | -0.91192 |
| H | -2.99275 | 3.25052  | 0.45484  |
| H | -2.42255 | 2.41908  | 2.75676  |
| H | -3.19802 | 1.53205  | 4.06386  |
| H | -3.91581 | 1.53226  | 2.45611  |
| H | -2.49708 | -3.56466 | 1.05127  |
| H | -2.18119 | -3.89894 | 2.75407  |
| H | -0.84627 | -3.84853 | 1.59895  |
| H | -0.34315 | 3.70134  | 0.31463  |
| H | 0.44203  | 4.87925  | 1.39061  |
| H | -0.26151 | 3.39812  | 2.05704  |
| H | 4.92261  | -0.17624 | -3.39836 |
| H | -1.18271 | -4.12044 | -2.58992 |
| H | -1.35192 | -4.65599 | -0.90939 |
| H | -0.15931 | -5.41937 | -1.97172 |
| H | 4.92891  | 0.83231  | 2.43345  |
| H | 6.15284  | -0.43240 | 2.27971  |
| H | 4.44179  | -0.85599 | 2.43222  |
| H | 2.37770  | -4.85535 | -0.38342 |
| H | 1.26009  | -4.50095 | 0.93485  |
| H | 2.53961  | -3.34310 | 0.51907  |
| H | 1.11674  | 0.95540  | 3.45498  |
| H | 0.02589  | 0.74038  | 4.82246  |
| H | -0.26333 | 2.04281  | 3.67817  |
| H | 7.07025  | -0.72387 | 0.26301  |
| H | 7.95522  | -1.63570 | -1.94649 |
| H | 8.05532  | 0.02494  | -2.53109 |
| H | 7.14405  | -1.17435 | -3.45256 |

100

U(IV) intermediate

|    |          |          |          |
|----|----------|----------|----------|
| C  | -0.53381 | -1.25608 | 2.67448  |
| C  | -0.83563 | 0.10386  | 2.95088  |
| C  | -2.20117 | 0.33328  | 2.61222  |
| C  | -2.74827 | -0.89826 | 2.14204  |
| C  | -1.70988 | -1.86758 | 2.15437  |
| C  | 0.05614  | 1.07273  | 3.66555  |
| C  | -2.96065 | 1.58659  | 2.93381  |
| C  | -4.19935 | -1.26034 | 2.02732  |
| C  | -1.90934 | -3.33300 | 1.91349  |
| C  | 0.70131  | -1.99538 | 3.09152  |
| U  | -0.94225 | -0.11254 | 0.13313  |
| N  | -0.31549 | -1.75502 | -0.68388 |
| Si | 0.42727  | -3.23837 | -1.30805 |
| C  | -0.90757 | -4.49285 | -1.81432 |
| N  | 0.89957  | 1.47119  | 0.32611  |
| Si | 1.54172  | 3.13279  | 0.50892  |
| C  | 2.80496  | 3.19688  | 1.92459  |
| P  | 1.85351  | 0.15339  | 0.72291  |
| C  | 3.45665  | 0.11334  | -0.19680 |
| C  | 3.58191  | 0.28884  | -1.59515 |
| C  | 4.84131  | 0.18036  | -2.18997 |
| C  | 5.99043  | -0.10392 | -1.45093 |
| C  | 5.84690  | -0.30946 | -0.07817 |
| C  | 4.60908  | -0.21611 | 0.56113  |
| C  | 2.39215  | 0.55999  | -2.47199 |
| C  | 7.34057  | -0.17740 | -2.11136 |
| C  | 4.55090  | -0.48276 | 2.04699  |
| C  | 1.55514  | -4.05265 | -0.01516 |
| C  | 1.53761  | -2.93852 | -2.81942 |
| C  | 0.14279  | 4.33142  | 0.94083  |
| C  | 2.46048  | 3.81124  | -1.00835 |
| C  | -2.65353 | 1.85478  | -1.08985 |
| C  | -1.65379 | 1.53142  | -2.05198 |
| C  | -1.86426 | 0.18971  | -2.46992 |
| C  | -2.99402 | -0.31951 | -1.76142 |
| C  | -3.49860 | 0.72122  | -0.93595 |
| C  | -0.73909 | 2.52011  | -2.70899 |
| C  | -2.97764 | 3.22409  | -0.56679 |
| C  | -4.88475 | 0.79658  | -0.36922 |
| C  | -3.65779 | -1.63976 | -2.01783 |
| C  | -1.20023 | -0.48669 | -3.62997 |
| H  | -0.31982 | 3.23463  | -1.99731 |
| H  | -1.28249 | 3.09777  | -3.46966 |
| H  | 0.09381  | 2.02966  | -3.21597 |
| H  | 1.01975  | -2.42652 | -3.63409 |
| H  | 1.88361  | -3.90720 | -3.19955 |
| H  | 2.42266  | -2.35468 | -2.55074 |
| H  | -4.25913 | -1.96797 | -1.16497 |
| H  | -2.92797 | -2.42591 | -2.22221 |
| H  | -4.33298 | -1.58215 | -2.88284 |



|   |          |          |          |
|---|----------|----------|----------|
| H | -5.33585 | -0.18625 | -0.22805 |
| H | -5.52921 | 1.34355  | -1.07243 |
| H | -4.93620 | 1.33460  | 0.58090  |
| H | 1.07441  | -2.65328 | 2.30391  |
| H | 0.49148  | -2.61691 | 3.97290  |
| H | 1.50827  | -1.30959 | 3.35722  |
| H | 3.33911  | 3.20279  | -1.24197 |
| H | 2.81251  | 4.82195  | -0.76891 |
| H | 1.83944  | 3.88325  | -1.90483 |
| H | 2.38705  | 2.84392  | 2.87132  |
| H | 3.13493  | 4.23236  | 2.06815  |
| H | 3.69072  | 2.59840  | 1.69069  |
| H | 2.05953  | 1.59530  | -2.37797 |
| H | 1.54575  | -0.07651 | -2.19688 |
| H | 2.63538  | 0.37412  | -3.52211 |
| H | -4.84912 | -0.38538 | 2.04781  |
| H | -4.48651 | -1.89381 | 2.87766  |
| H | -4.42917 | -1.83029 | 1.12170  |
| H | -0.15155 | -0.19886 | -3.73757 |
| H | -1.70632 | -0.22348 | -4.56925 |
| H | -1.23544 | -1.57384 | -3.53389 |
| H | -4.01054 | 3.49418  | -0.82260 |
| H | -2.33193 | 3.98368  | -1.01304 |
| H | -2.89075 | 3.31500  | 0.52116  |
| H | -2.38023 | 2.49067  | 2.72114  |
| H | -3.22042 | 1.62525  | 4.00060  |
| H | -3.89543 | 1.65812  | 2.37340  |
| H | -2.59246 | -3.52302 | 1.08052  |
| H | -2.33883 | -3.81897 | 2.80137  |
| H | -0.96717 | -3.83660 | 1.68966  |
| H | -0.55023 | 4.48482  | 0.11147  |
| H | 0.57499  | 5.30525  | 1.19764  |
| H | -0.43134 | 3.98430  | 1.80507  |
| H | 4.92126  | 0.31056  | -3.26793 |
| H | -1.46208 | -4.15965 | -2.69731 |
| H | -1.62457 | -4.66716 | -1.00702 |
| H | -0.44064 | -5.45291 | -2.06332 |
| H | 4.17623  | 0.38083  | 2.60685  |
| H | 5.54646  | -0.72349 | 2.43078  |
| H | 3.89203  | -1.32544 | 2.28326  |
| H | 2.10146  | -4.88144 | -0.48070 |
| H | 1.00781  | -4.45825 | 0.84046  |
| H | 2.29311  | -3.33392 | 0.35437  |
| H | 1.10855  | 0.91587  | 3.41247  |
| H | -0.04132 | 0.96147  | 4.75420  |
| H | -0.18869 | 2.11075  | 3.42449  |
| H | 6.72486  | -0.55595 | 0.51633  |
| H | 8.01293  | -0.85442 | -1.57611 |
| H | 7.82114  | 0.80875  | -2.13342 |
| H | 7.26228  | -0.52292 | -3.14658 |

100

U(IV) TS P - N bond formation

|    |          |          |          |
|----|----------|----------|----------|
| C  | 5.06907  | 7.35816  | 10.45275 |
| C  | 4.70429  | 8.71035  | 10.69025 |
| C  | 3.32880  | 8.86611  | 10.34610 |
| C  | 2.84194  | 7.59883  | 9.91129  |
| C  | 3.92940  | 6.68236  | 9.93652  |
| C  | 5.55636  | 9.72948  | 11.38294 |
| C  | 2.51371  | 10.09967 | 10.60755 |
| C  | 1.40871  | 7.16566  | 9.82604  |
| C  | 3.81601  | 5.20419  | 9.71158  |
| C  | 6.32880  | 6.68916  | 10.91230 |
| U  | 4.64271  | 8.45750  | 7.88146  |
| N  | 5.80448  | 6.99708  | 7.16269  |
| Si | 6.63232  | 5.52905  | 6.61065  |
| C  | 5.34329  | 4.18254  | 6.23101  |
| N  | 6.46159  | 9.98691  | 8.02560  |
| Si | 6.98356  | 11.68191 | 8.19943  |
| C  | 8.26914  | 11.83897 | 9.58764  |
| P  | 7.44411  | 8.70384  | 8.43860  |
| C  | 8.96858  | 8.64101  | 7.38775  |
| C  | 9.06609  | 8.91809  | 6.00366  |
| C  | 10.31650 | 8.88100  | 5.38197  |
| C  | 11.48527 | 8.57505  | 6.08014  |
| C  | 11.37333 | 8.27821  | 7.43880  |
| C  | 10.14681 | 8.29879  | 8.10558  |
| C  | 7.85872  | 9.21829  | 5.16459  |
| C  | 12.82350 | 8.57635  | 5.39284  |
| C  | 10.14842 | 7.96478  | 9.58188  |
| C  | 7.81174  | 4.81989  | 7.91967  |
| C  | 7.66559  | 5.74995  | 5.03323  |
| C  | 5.49079  | 12.75929 | 8.63085  |
| C  | 7.81046  | 12.43532 | 6.66562  |
| C  | 2.84471  | 10.11868 | 6.41510  |
| C  | 3.87177  | 9.75835  | 5.49629  |
| C  | 3.74652  | 8.36681  | 5.22589  |
| C  | 2.64779  | 7.86793  | 5.98275  |
| C  | 2.07052  | 8.95986  | 6.69106  |
| C  | 4.71370  | 10.73385 | 4.72788  |
| C  | 2.45289  | 11.51207 | 6.81397  |
| C  | 0.68667  | 9.01578  | 7.26544  |
| C  | 2.07299  | 6.48597  | 5.86618  |
| C  | 4.45633  | 7.60788  | 4.14709  |
| H  | 5.13875  | 11.51739 | 5.36102  |
| H  | 4.11013  | 11.23475 | 3.95846  |
| H  | 5.54003  | 10.24138 | 4.21321  |
| H  | 7.07955  | 6.16223  | 4.20774  |
| H  | 8.03624  | 4.76652  | 4.71967  |
| H  | 8.53318  | 6.39408  | 5.19730  |
| H  | 1.43028  | 6.23751  | 6.71556  |
| H  | 2.85170  | 5.72057  | 5.81043  |
| H  | 1.45785  | 6.38724  | 4.96096  |
| H  | 0.28480  | 8.02744  | 7.49141  |
| H  | 0.00849  | 9.47523  | 6.53211  |

|           |          |          |          |
|-----------|----------|----------|----------|
| H         | 0.62068  | 9.62356  | 8.17242  |
| H         | 6.75008  | 6.03027  | 10.15058 |
| H         | 6.12916  | 6.08119  | 11.80552 |
| H         | 7.09809  | 7.41795  | 11.17481 |
| H         | 8.72161  | 11.89570 | 6.39092  |
| H         | 8.09781  | 13.46602 | 6.90686  |
| H         | 7.15296  | 12.47435 | 5.79261  |
| H         | 7.88580  | 11.49594 | 10.55229 |
| H         | 8.56157  | 12.88975 | 9.69647  |
| H         | 9.17448  | 11.26914 | 9.35349  |
| H         | 7.56696  | 10.26597 | 5.25439  |
| H         | 7.00387  | 8.61579  | 5.48023  |
| H         | 8.06503  | 9.01492  | 4.10949  |
| H         | 0.71946  | 8.00791  | 9.76346  |
| H         | 1.14525  | 6.60246  | 10.73208 |
| H         | 1.20911  | 6.50209  | 8.97903  |
| H         | 5.46123  | 7.99267  | 3.95999  |
| H         | 3.90131  | 7.67449  | 3.20078  |
| H         | 4.55112  | 6.54823  | 4.39385  |
| H         | 2.39991  | 11.65539 | 7.89938  |
| H         | 1.45941  | 11.76118 | 6.41701  |
| H         | 3.14814  | 12.25465 | 6.41499  |
| H         | 3.04385  | 11.01728 | 10.32832 |
| H         | 2.26594  | 10.19385 | 11.67362 |
| H         | 1.56853  | 10.09174 | 10.05905 |
| H         | 3.15423  | 4.96185  | 8.87407  |
| H         | 3.40551  | 4.70085  | 10.59876 |
| H         | 4.78993  | 4.75431  | 9.50498  |
| H         | 4.75963  | 12.78855 | 7.81977  |
| H         | 5.82444  | 13.78698 | 8.81360  |
| H         | 4.98391  | 12.40836 | 9.53426  |
| H         | 10.37308 | 9.08394  | 4.31382  |
| H         | 4.75451  | 4.41729  | 5.33895  |
| H         | 4.65438  | 4.03024  | 7.06606  |
| H         | 5.85791  | 3.23298  | 6.04147  |
| H         | 9.87028  | 8.82690  | 10.19767 |
| H         | 11.14760 | 7.64542  | 9.89173  |
| H         | 9.44915  | 7.16078  | 9.83076  |
| H         | 8.38173  | 3.99332  | 7.47943  |
| H         | 7.27864  | 4.42591  | 8.78966  |
| H         | 8.53067  | 5.56976  | 8.26155  |
| H         | 6.60656  | 9.64319  | 11.08818 |
| H         | 5.51021  | 9.60229  | 12.47320 |
| H         | 5.23300  | 10.75092 | 11.16548 |
| H         | 12.26855 | 8.01722  | 8.00026  |
| H         | 13.28165 | 9.57258  | 5.43115  |
| H         | 12.73256 | 8.30155  | 4.33780  |
| H         | 13.51995 | 7.87985  | 5.86883  |
| 100       |          |          |          |
| Complex 4 |          |          |          |
| C         | -0.82987 | -1.36430 | 2.62994  |
| C         | -0.99268 | 0.01624  | 2.93318  |

|    |          |          |          |
|----|----------|----------|----------|
| C  | -2.33359 | 0.38454  | 2.61289  |
| C  | -3.00167 | -0.77671 | 2.13344  |
| C  | -2.06491 | -1.84722 | 2.11180  |
| C  | 0.00842  | 0.83816  | 3.68565  |
| C  | -2.98362 | 1.69959  | 2.93649  |
| C  | -4.48404 | -0.99244 | 2.07141  |
| C  | -2.43741 | -3.27871 | 1.85055  |
| C  | 0.35628  | -2.18680 | 3.02883  |
| U  | -1.06228 | -0.05624 | 0.15987  |
| N  | 0.81095  | -1.23891 | -0.24513 |
| Si | 1.39981  | -2.84158 | -0.73979 |
| C  | -0.04150 | -4.07406 | -0.76927 |
| N  | 0.77175  | 1.22834  | 0.38082  |
| Si | 1.33759  | 2.88005  | 0.71331  |
| C  | 2.69077  | 2.95760  | 2.04227  |
| P  | 1.89692  | -0.11552 | 0.56029  |
| C  | 3.40915  | 0.16126  | -0.53425 |
| C  | 3.45003  | 0.44759  | -1.91410 |
| C  | 4.67897  | 0.58474  | -2.56981 |
| C  | 5.89081  | 0.45576  | -1.89779 |
| C  | 5.84550  | 0.16832  | -0.53259 |
| C  | 4.64289  | 0.01459  | 0.16208  |
| C  | 2.20512  | 0.63481  | -2.73148 |
| C  | 7.20561  | 0.63599  | -2.60796 |
| C  | 4.74913  | -0.32032 | 1.63648  |
| C  | 2.73076  | -3.53015 | 0.42426  |
| C  | 2.16265  | -2.84705 | -2.47636 |
| C  | -0.10662 | 3.97378  | 1.27667  |
| C  | 2.08406  | 3.71958  | -0.81662 |
| C  | -2.67638 | 1.60556  | -1.45576 |
| C  | -1.68172 | 1.10332  | -2.34263 |
| C  | -1.90497 | -0.29145 | -2.50279 |
| C  | -3.06248 | -0.64177 | -1.74116 |
| C  | -3.55981 | 0.54079  | -1.12946 |
| C  | -0.78180 | 1.97391  | -3.16708 |
| C  | -2.94428 | 3.05551  | -1.17172 |
| C  | -4.93166 | 0.76776  | -0.56986 |
| C  | -3.73616 | -1.98338 | -1.77581 |
| C  | -1.22005 | -1.19588 | -3.48518 |
| H  | -0.14594 | 2.62270  | -2.55941 |
| H  | -1.38524 | 2.62244  | -3.81582 |
| H  | -0.13134 | 1.38664  | -3.81610 |
| H  | 1.45542  | -2.51811 | -3.24195 |
| H  | 2.47053  | -3.87035 | -2.72263 |
| H  | 3.04918  | -2.20993 | -2.52813 |
| H  | -4.47287 | -2.09183 | -0.97558 |
| H  | -3.02691 | -2.81326 | -1.68170 |
| H  | -4.26662 | -2.13499 | -2.72560 |
| H  | -5.44690 | -0.16019 | -0.32121 |
| H  | -5.54631 | 1.28453  | -1.31994 |
| H  | -4.93005 | 1.40206  | 0.32155  |
| H  | 0.36138  | -3.16338 | 2.53962  |

|   |          |          |          |
|---|----------|----------|----------|
| H | 0.34744  | -2.36576 | 4.11292  |
| H | 1.29739  | -1.68608 | 2.78061  |
| H | 2.94799  | 3.16375  | -1.19152 |
| H | 2.42472  | 4.72525  | -0.54332 |
| H | 1.36198  | 3.82573  | -1.63134 |
| H | 2.41495  | 2.44381  | 2.96625  |
| H | 2.88402  | 4.00897  | 2.28648  |
| H | 3.62856  | 2.53144  | 1.67415  |
| H | 2.04029  | 1.69730  | -2.93163 |
| H | 1.32648  | 0.24614  | -2.21846 |
| H | 2.29980  | 0.13219  | -3.70025 |
| H | -5.04585 | -0.05881 | 2.02771  |
| H | -4.80980 | -1.51608 | 2.98151  |
| H | -4.79342 | -1.61534 | 1.22741  |
| H | -0.21025 | -0.85460 | -3.72257 |
| H | -1.78170 | -1.23743 | -4.42877 |
| H | -1.13922 | -2.22373 | -3.12051 |
| H | -3.25665 | 3.23467  | -0.13712 |
| H | -3.75157 | 3.43630  | -1.81344 |
| H | -2.06542 | 3.67532  | -1.36583 |
| H | -2.30700 | 2.54638  | 2.79025  |
| H | -3.31023 | 1.73226  | 3.98466  |
| H | -3.87001 | 1.88099  | 2.32120  |
| H | -2.79494 | -3.45884 | 0.83032  |
| H | -3.24418 | -3.59279 | 2.52578  |
| H | -1.59604 | -3.95203 | 2.02635  |
| H | -0.92231 | 3.98323  | 0.54899  |
| H | 0.24830  | 5.00559  | 1.38051  |
| H | -0.50952 | 3.66803  | 2.24578  |
| H | 4.67973  | 0.79833  | -3.63801 |
| H | -0.90546 | -3.69864 | -1.32667 |
| H | -0.37550 | -4.33644 | 0.23701  |
| H | 0.28498  | -4.99710 | -1.26190 |
| H | 4.23829  | 0.40801  | 2.27114  |
| H | 5.80244  | -0.34636 | 1.93246  |
| H | 4.31040  | -1.29422 | 1.87167  |
| H | 2.94667  | -4.56948 | 0.14993  |
| H | 2.41067  | -3.51332 | 1.46850  |
| H | 3.66357  | -2.96530 | 0.33898  |
| H | 1.02716  | 0.62371  | 3.35082  |
| H | -0.04346 | 0.61656  | 4.76067  |
| H | -0.16465 | 1.91053  | 3.57039  |
| H | 6.78067  | 0.05141  | 0.01247  |
| H | 7.61684  | 1.63657  | -2.42579 |
| H | 7.09645  | 0.51857  | -3.68989 |
| H | 7.95082  | -0.08672 | -2.26052 |

100

U(VI) TS P-Si activation

|   |          |          |         |
|---|----------|----------|---------|
| C | -0.34316 | -1.27466 | 2.63294 |
| C | -0.71730 | 0.05945  | 2.97220 |
| C | -2.07682 | 0.24340  | 2.60888 |
| C | -2.55525 | -0.99238 | 2.06941 |

|    |          |          |          |
|----|----------|----------|----------|
| C  | -1.47726 | -1.92133 | 2.07646  |
| C  | 0.09394  | 0.99473  | 3.81675  |
| C  | -2.89024 | 1.45702  | 2.95411  |
| C  | -3.98602 | -1.41550 | 1.92108  |
| C  | -1.61280 | -3.38675 | 1.80046  |
| C  | 0.92612  | -1.94931 | 3.05287  |
| U  | -0.67710 | -0.07066 | 0.12340  |
| N  | 0.03422  | -1.69286 | -0.63555 |
| Si | 0.80167  | -3.17034 | -1.27370 |
| C  | -0.52079 | -4.44746 | -1.75446 |
| N  | 0.64629  | 1.49265  | 0.03313  |
| Si | 1.89650  | 3.00553  | 0.88232  |
| C  | 3.32221  | 3.34625  | 2.13073  |
| P  | 1.94134  | 0.61113  | 0.87170  |
| C  | 3.42486  | 0.19817  | -0.17528 |
| C  | 3.55493  | 0.27532  | -1.58119 |
| C  | 4.78038  | -0.03577 | -2.17767 |
| C  | 5.89634  | -0.42866 | -1.43894 |
| C  | 5.74970  | -0.52123 | -0.05628 |
| C  | 4.54711  | -0.21930 | 0.58744  |
| C  | 2.41282  | 0.66632  | -2.47464 |
| C  | 7.21223  | -0.72000 | -2.10863 |
| C  | 4.49685  | -0.37397 | 2.08954  |
| C  | 1.96202  | -3.95927 | 0.00385  |
| C  | 1.87011  | -2.84832 | -2.80676 |
| C  | 0.44289  | 3.98315  | 1.60361  |
| C  | 2.54303  | 3.79149  | -0.71580 |
| C  | -2.40563 | 1.81395  | -1.19204 |
| C  | -1.46583 | 1.40323  | -2.17113 |
| C  | -1.70712 | 0.03075  | -2.46301 |
| C  | -2.82271 | -0.39884 | -1.68276 |
| C  | -3.27356 | 0.71629  | -0.92301 |
| C  | -0.56698 | 2.33285  | -2.92448 |
| C  | -2.62463 | 3.21995  | -0.72193 |
| C  | -4.62648 | 0.88785  | -0.30155 |
| C  | -3.51461 | -1.72059 | -1.84916 |
| C  | -1.12423 | -0.74795 | -3.60200 |
| H  | 0.02555  | 2.95781  | -2.25208 |
| H  | -1.16154 | 3.00119  | -3.56148 |
| H  | 0.12211  | 1.79557  | -3.57851 |
| H  | 1.31341  | -2.38410 | -3.62417 |
| H  | 2.25500  | -3.80950 | -3.16834 |
| H  | 2.72857  | -2.21589 | -2.56531 |
| H  | -4.36699 | -1.82112 | -1.17265 |
| H  | -2.84475 | -2.56633 | -1.66559 |
| H  | -3.90385 | -1.83346 | -2.86976 |
| H  | -5.13304 | -0.06027 | -0.12076 |
| H  | -5.26173 | 1.46332  | -0.98940 |
| H  | -4.60049 | 1.44781  | 0.63668  |
| H  | 1.36688  | -2.54227 | 2.24933  |
| H  | 0.73939  | -2.62359 | 3.90013  |
| H  | 1.67042  | -1.21643 | 3.37009  |

|   |          |          |          |
|---|----------|----------|----------|
| H | 3.39141  | 3.23118  | -1.11942 |
| H | 2.90462  | 4.79567  | -0.46408 |
| H | 1.78192  | 3.88664  | -1.49258 |
| H | 3.08865  | 2.95643  | 3.12682  |
| H | 3.48769  | 4.42776  | 2.22150  |
| H | 4.25819  | 2.88899  | 1.79416  |
| H | 2.06591  | 1.67764  | -2.26481 |
| H | 1.55581  | 0.00311  | -2.32757 |
| H | 2.71099  | 0.61246  | -3.52600 |
| H | -4.67713 | -0.57424 | 1.97130  |
| H | -4.24869 | -2.09629 | 2.74228  |
| H | -4.17795 | -1.95768 | 0.99147  |
| H | -0.09958 | -0.44745 | -3.83271 |
| H | -1.71945 | -0.59470 | -4.51324 |
| H | -1.11723 | -1.81993 | -3.39405 |
| H | -3.46939 | 3.68520  | -1.24992 |
| H | -1.74730 | 3.84432  | -0.90711 |
| H | -2.85449 | 3.27606  | 0.34747  |
| H | -2.47823 | 2.37898  | 2.52814  |
| H | -2.93120 | 1.60161  | 4.04139  |
| H | -3.92185 | 1.36714  | 2.60829  |
| H | -2.25643 | -3.58685 | 0.93899  |
| H | -2.05718 | -3.90474 | 2.66257  |
| H | -0.64329 | -3.84938 | 1.60672  |
| H | -0.40266 | 4.01793  | 0.91586  |
| H | 0.78379  | 5.00596  | 1.80428  |
| H | 0.10697  | 3.55922  | 2.55235  |
| H | 4.85830  | 0.03118  | -3.26166 |
| H | -1.14283 | -4.09484 | -2.58283 |
| H | -1.17671 | -4.69190 | -0.91456 |
| H | -0.03417 | -5.37428 | -2.08014 |
| H | 4.19331  | 0.54995  | 2.59265  |
| H | 5.48039  | -0.65640 | 2.47572  |
| H | 3.78687  | -1.15101 | 2.39248  |
| H | 2.49917  | -4.79011 | -0.46874 |
| H | 1.43709  | -4.36119 | 0.87499  |
| H | 2.70784  | -3.23591 | 0.34685  |
| H | 1.09956  | 1.16288  | 3.41677  |
| H | 0.21418  | 0.58244  | 4.82748  |
| H | -0.39647 | 1.96486  | 3.92357  |
| H | 6.59692  | -0.83974 | 0.54879  |
| H | 7.82031  | -1.40948 | -1.51545 |
| H | 7.79841  | 0.19774  | -2.24390 |
| H | 7.06861  | -1.16077 | -3.10000 |

100

U (VI) intermediate

|   |          |          |         |
|---|----------|----------|---------|
| C | -0.52299 | -1.31530 | 2.64852 |
| C | -0.83902 | 0.03837  | 2.96608 |
| C | -2.18441 | 0.28280  | 2.57824 |
| C | -2.70693 | -0.92912 | 2.03020 |
| C | -1.67102 | -1.90577 | 2.05718 |
| C | 0.01770  | 0.94253  | 3.79572 |

|    |          |          |          |
|----|----------|----------|----------|
| C  | -2.94831 | 1.53544  | 2.89751  |
| C  | -4.15252 | -1.29100 | 1.85542  |
| C  | -1.86955 | -3.36339 | 1.77536  |
| C  | 0.67969  | -2.05168 | 3.14896  |
| U  | -0.78190 | -0.06723 | 0.12859  |
| N  | -0.12447 | -1.67833 | -0.66900 |
| Si | 0.63528  | -3.16840 | -1.29195 |
| C  | -0.69895 | -4.43256 | -1.77372 |
| N  | 0.73781  | 1.55169  | 0.39572  |
| Si | 1.22834  | 3.24050  | 0.76446  |
| C  | 2.79371  | 3.29338  | 1.83119  |
| P  | 1.78975  | 0.27956  | 0.95199  |
| C  | 3.27120  | 0.02587  | -0.14373 |
| C  | 3.39001  | 0.29526  | -1.52748 |
| C  | 4.61111  | 0.10486  | -2.17790 |
| C  | 5.74327  | -0.36449 | -1.51137 |
| C  | 5.61466  | -0.65295 | -0.15387 |
| C  | 4.41642  | -0.46592 | 0.54111  |
| C  | 2.21620  | 0.75432  | -2.33841 |
| C  | 7.05686  | -0.53132 | -2.22664 |
| C  | 4.40858  | -0.80647 | 2.01363  |
| C  | 1.76248  | -3.95184 | 0.01509  |
| C  | 1.72856  | -2.84464 | -2.80525 |
| C  | -0.12028 | 4.18112  | 1.71201  |
| C  | 1.62439  | 4.26659  | -0.78580 |
| C  | -2.37747 | 1.91569  | -1.28757 |
| C  | -1.46699 | 1.39650  | -2.24634 |
| C  | -1.80073 | 0.03175  | -2.47417 |
| C  | -2.92547 | -0.29044 | -1.66257 |
| C  | -3.29942 | 0.88736  | -0.94941 |
| C  | -0.59378 | 2.23430  | -3.12989 |
| C  | -2.55830 | 3.36536  | -0.95559 |
| C  | -4.62073 | 1.16354  | -0.29666 |
| C  | -3.68318 | -1.58483 | -1.74750 |
| C  | -1.28026 | -0.82247 | -3.58847 |
| H  | -0.01203 | 2.97272  | -2.57671 |
| H  | -1.21827 | 2.78478  | -3.84722 |
| H  | 0.10308  | 1.63008  | -3.71245 |
| H  | 1.17692  | -2.41273 | -3.64343 |
| H  | 2.15268  | -3.79851 | -3.14093 |
| H  | 2.56004  | -2.18044 | -2.55343 |
| H  | -4.66164 | -1.51155 | -1.26643 |
| H  | -3.14732 | -2.42431 | -1.29051 |
| H  | -3.86274 | -1.85640 | -2.79454 |
| H  | -5.19136 | 0.25412  | -0.10893 |
| H  | -5.22714 | 1.79117  | -0.96405 |
| H  | -4.53019 | 1.70774  | 0.64669  |
| H  | 0.99549  | -2.84525 | 2.46947  |
| H  | 0.45613  | -2.51821 | 4.11893  |
| H  | 1.52561  | -1.37599 | 3.28932  |
| H  | 2.36614  | 3.78676  | -1.43048 |
| H  | 2.05037  | 5.22049  | -0.45207 |



|   |          |          |          |
|---|----------|----------|----------|
| H | 0.74153  | 4.50110  | -1.38684 |
| H | 2.64620  | 2.80365  | 2.79757  |
| H | 3.06236  | 4.34023  | 2.01836  |
| H | 3.63906  | 2.81000  | 1.33272  |
| H | 1.82412  | 1.70489  | -1.97750 |
| H | 1.39596  | 0.03040  | -2.27032 |
| H | 2.48661  | 0.86422  | -3.39298 |
| H | -4.80851 | -0.42211 | 1.91226  |
| H | -4.45344 | -1.97379 | 2.66148  |
| H | -4.35751 | -1.80838 | 0.91483  |
| H | -0.24170 | -0.59233 | -3.83634 |
| H | -1.87359 | -0.66255 | -4.49990 |
| H | -1.33445 | -1.88488 | -3.34445 |
| H | -3.27180 | 3.83420  | -1.64896 |
| H | -1.62379 | 3.92560  | -1.03472 |
| H | -2.95793 | 3.51687  | 0.05209  |
| H | -2.65134 | 2.39418  | 2.28384  |
| H | -2.78955 | 1.82741  | 3.94203  |
| H | -4.02351 | 1.39316  | 2.76643  |
| H | -2.53520 | -3.53178 | 0.92359  |
| H | -2.32148 | -3.86911 | 2.64060  |
| H | -0.92429 | -3.86623 | 1.56218  |
| H | -1.10081 | 4.11310  | 1.23699  |
| H | 0.15252  | 5.24202  | 1.75769  |
| H | -0.20962 | 3.82048  | 2.73992  |
| H | 4.67231  | 0.32132  | -3.24353 |
| H | -1.34236 | -4.06562 | -2.57893 |
| H | -1.33450 | -4.69038 | -0.92187 |
| H | -0.22198 | -5.35467 | -2.12580 |
| H | 4.08704  | 0.04305  | 2.62498  |
| H | 5.40973  | -1.10569 | 2.33805  |
| H | 3.72733  | -1.63300 | 2.24263  |
| H | 2.33183  | -4.76941 | -0.44232 |
| H | 1.20922  | -4.36922 | 0.86106  |
| H | 2.47825  | -3.21589 | 0.39216  |
| H | 1.04604  | 0.98401  | 3.41760  |
| H | 0.06517  | 0.57903  | 4.83107  |
| H | -0.37790 | 1.95951  | 3.82390  |
| H | 6.47776  | -1.03176 | 0.39120  |
| H | 7.68363  | -1.28673 | -1.74333 |
| H | 7.62524  | 0.40740  | -2.23411 |
| H | 6.91062  | -0.82825 | -3.26995 |

100

U(VI) TS P - N bond formation

|   |         |          |          |
|---|---------|----------|----------|
| C | 5.07294 | 7.45436  | 10.50443 |
| C | 4.74393 | 8.82988  | 10.66876 |
| C | 3.37238 | 9.00431  | 10.32996 |
| C | 2.84946 | 7.73129  | 9.96333  |
| C | 3.91380 | 6.78464  | 10.03012 |
| C | 5.62981 | 9.84212  | 11.32402 |
| C | 2.59299 | 10.27477 | 10.50711 |
| C | 1.40596 | 7.32659  | 9.94625  |

|    |          |          |          |
|----|----------|----------|----------|
| C  | 3.73864  | 5.30099  | 9.89015  |
| C  | 6.31270  | 6.79987  | 11.02798 |
| U  | 4.63651  | 8.42583  | 7.86510  |
| N  | 6.06913  | 7.16979  | 7.24066  |
| Si | 6.91426  | 5.66364  | 6.79409  |
| C  | 5.63745  | 4.25800  | 6.70814  |
| N  | 6.29153  | 10.00226 | 7.89510  |
| Si | 6.77739  | 11.70988 | 8.04332  |
| C  | 8.17605  | 11.93604 | 9.30641  |
| P  | 7.33749  | 8.76234  | 8.42339  |
| C  | 8.84091  | 8.69990  | 7.31789  |
| C  | 8.91759  | 8.94904  | 5.92666  |
| C  | 10.16395 | 8.98652  | 5.29607  |
| C  | 11.35643 | 8.78097  | 5.99008  |
| C  | 11.27211 | 8.53257  | 7.35878  |
| C  | 10.04996 | 8.48841  | 8.03650  |
| C  | 7.69552  | 9.16939  | 5.08431  |
| C  | 12.68218 | 8.79684  | 5.27831  |
| C  | 10.10390 | 8.22531  | 9.52712  |
| C  | 8.24195  | 5.14994  | 8.04705  |
| C  | 7.77478  | 5.71740  | 5.10451  |
| C  | 5.29607  | 12.75099 | 8.60308  |
| C  | 7.43184  | 12.48046 | 6.43517  |
| C  | 2.77660  | 9.91172  | 6.26730  |
| C  | 3.77530  | 9.43685  | 5.37143  |
| C  | 3.64037  | 8.02256  | 5.27301  |
| C  | 2.55845  | 7.62608  | 6.10954  |
| C  | 2.00115  | 8.80214  | 6.69433  |
| C  | 4.58631  | 10.31553 | 4.46609  |
| C  | 2.40773  | 11.34917 | 6.49080  |
| C  | 0.62939  | 8.94333  | 7.28286  |
| C  | 1.97668  | 6.24250  | 6.16651  |
| C  | 4.32333  | 7.14606  | 4.26799  |
| H  | 5.08491  | 11.12754 | 5.00147  |
| H  | 3.93810  | 10.77768 | 3.70904  |
| H  | 5.35272  | 9.75329  | 3.93122  |
| H  | 7.09114  | 5.98197  | 4.29392  |
| H  | 8.17250  | 4.71797  | 4.89044  |
| H  | 8.61256  | 6.41898  | 5.09728  |
| H  | 2.75167  | 5.46974  | 6.16283  |
| H  | 1.32926  | 6.04755  | 5.30037  |
| H  | 1.36514  | 6.08881  | 7.06004  |
| H  | 0.21091  | 7.99140  | 7.61093  |
| H  | -0.05070 | 9.34380  | 6.51783  |
| H  | 0.59158  | 9.63987  | 8.12567  |
| H  | 6.50245  | 5.83745  | 10.54777 |
| H  | 6.21041  | 6.60973  | 12.10548 |
| H  | 7.19466  | 7.42719  | 10.88030 |
| H  | 8.34269  | 11.98222 | 6.09049  |
| H  | 7.68587  | 13.52787 | 6.63865  |
| H  | 6.70323  | 12.47427 | 5.61941  |
| H  | 7.89860  | 11.59135 | 10.30589 |

|   |          |          |          |
|---|----------|----------|----------|
| H | 8.42649  | 13.00125 | 9.37636  |
| H | 9.08151  | 11.40450 | 8.99650  |
| H | 7.33458  | 10.19462 | 5.17924  |
| H | 6.88124  | 8.51537  | 5.40076  |
| H | 7.91769  | 8.98576  | 4.02850  |
| H | 0.73158  | 8.17760  | 9.85015  |
| H | 1.16095  | 6.82973  | 10.89542 |
| H | 1.16748  | 6.61371  | 9.15190  |
| H | 4.39446  | 6.11109  | 4.60901  |
| H | 5.33579  | 7.48797  | 4.04265  |
| H | 3.76390  | 7.13646  | 3.32201  |
| H | 2.16122  | 11.56781 | 7.53549  |
| H | 1.52398  | 11.62136 | 5.89627  |
| H | 3.21191  | 12.02474 | 6.18835  |
| H | 3.13229  | 11.14923 | 10.12765 |
| H | 2.38333  | 10.46828 | 11.56770 |
| H | 1.62949  | 10.23694 | 9.99225  |
| H | 3.15404  | 5.02724  | 9.00521  |
| H | 3.20889  | 4.88580  | 10.75903 |
| H | 4.69981  | 4.78616  | 9.82375  |
| H | 4.41352  | 12.58038 | 7.98167  |
| H | 5.54827  | 13.81539 | 8.53596  |
| H | 5.02799  | 12.54083 | 9.64234  |
| H | 10.19784 | 9.17428  | 4.22388  |
| H | 4.92074  | 4.40853  | 5.89586  |
| H | 5.07833  | 4.14913  | 7.64037  |
| H | 6.15672  | 3.31189  | 6.51495  |
| H | 9.71355  | 9.06728  | 10.10756 |
| H | 11.13955 | 8.05568  | 9.83660  |
| H | 9.52284  | 7.34527  | 9.81758  |
| H | 8.62070  | 4.15933  | 7.76907  |
| H | 7.86143  | 5.08718  | 9.06925  |
| H | 9.08682  | 5.84284  | 8.03093  |
| H | 6.66191  | 9.75888  | 10.96908 |
| H | 5.64612  | 9.69056  | 12.41206 |
| H | 5.28817  | 10.86442 | 11.14541 |
| H | 12.18772 | 8.36953  | 7.92429  |
| H | 13.50846 | 8.97245  | 5.97303  |
| H | 12.71369 | 9.57381  | 4.50799  |
| H | 12.87132 | 7.83864  | 4.77864  |

16

N3SiMe3

|    |          |         |          |
|----|----------|---------|----------|
| N  | -1.91480 | 4.30001 | 12.00322 |
| N  | -1.05269 | 4.33061 | 12.75173 |
| N  | -0.15724 | 4.26517 | 13.57871 |
| Si | 1.00326  | 5.59130 | 13.93422 |
| C  | 0.04205  | 7.10405 | 14.52101 |
| C  | 1.98175  | 5.98328 | 12.37023 |
| C  | 2.09261  | 4.87665 | 15.28607 |
| H  | 2.52258  | 5.10164 | 12.01372 |
| H  | 2.71335  | 6.77436 | 12.56846 |
| H  | 1.32530  | 6.32967 | 11.56568 |

|           |          |          |           |
|-----------|----------|----------|-----------|
| H         | 2.59843  | 3.97090  | 14.93907  |
| H         | 1.49979  | 4.61842  | 16.16839  |
| H         | 2.85634  | 5.60110  | 15.58689  |
| H         | 0.73082  | 7.91903  | 14.76950  |
| H         | -0.54749 | 6.87328  | 15.41319  |
| H         | -0.63982 | 7.46782  | 13.74575  |
| 2         |          |          |           |
| N2        |          |          |           |
| N         | 0.000000 | 0.000000 | -0.007161 |
| N         | 0.000000 | 0.000000 | 1.097161  |
| 80        |          |          |           |
| Complex 1 |          |          |           |
| C         | 0.01334  | 0.70495  | -3.32868  |
| C         | 0.24965  | -0.61503 | -2.85708  |
| C         | 1.65650  | -0.79929 | -2.74764  |
| C         | 2.29103  | 0.41127  | -3.15648  |
| C         | 1.27375  | 1.34919  | -3.50138  |
| C         | -0.80290 | -1.54826 | -2.34064  |
| C         | 2.32199  | -1.99468 | -2.13328  |
| C         | 3.75994  | 0.71401  | -3.09080  |
| C         | 1.50170  | 2.81758  | -3.70947  |
| C         | -1.34438 | 1.33995  | -3.39840  |
| U         | 1.27893  | -0.61023 | -5.45313  |
| C         | -0.37681 | -2.30834 | -5.41397  |
| P         | 3.36792  | -2.45191 | -5.71341  |
| C         | 2.87350  | -4.22342 | -5.50788  |
| C         | 2.22426  | -4.91012 | -6.54740  |
| C         | 1.83553  | -6.24098 | -6.40184  |
| C         | 2.09423  | -6.92267 | -5.21389  |
| C         | 2.74342  | -6.26053 | -4.17275  |
| C         | 3.12389  | -4.92694 | -4.31652  |
| Si        | 5.61135  | -2.58488 | -5.94810  |
| C         | 6.33277  | -0.82963 | -6.01885  |
| C         | 6.04679  | -3.51419 | -7.54683  |
| C         | 6.41313  | -3.50776 | -4.49261  |
| C         | 1.96911  | 0.30000  | -7.94005  |
| C         | 0.92265  | -0.63822 | -8.17398  |
| C         | -0.29187 | -0.07574 | -7.68877  |
| C         | 0.00463  | 1.21279  | -7.15818  |
| C         | 1.40242  | 1.44546  | -7.31318  |
| C         | -1.02670 | 2.22850  | -6.76397  |
| C         | -1.66784 | -0.63587 | -7.89319  |
| C         | 1.05138  | -1.91259 | -8.95465  |
| C         | 3.37452  | 0.20401  | -8.45368  |
| C         | 2.13047  | 2.74142  | -7.10202  |
| H         | -0.28073 | -2.84708 | -6.36955  |
| H         | -1.43951 | -2.08136 | -5.26696  |
| H         | -0.07334 | -3.01418 | -4.62498  |
| H         | 4.36002  | -0.19917 | -3.10662  |
| H         | 4.01086  | 1.25845  | -2.17039  |
| H         | 4.09216  | 1.34034  | -3.92668  |
| H         | 1.54897  | 3.44670  | -6.50585  |

|   |          |          |           |
|---|----------|----------|-----------|
| H | 2.33844  | 3.22587  | -8.06519  |
| H | 3.09803  | 2.60882  | -6.60410  |
| H | 2.02530  | -4.39091 | -7.47981  |
| H | 3.62032  | -4.42099 | -3.49423  |
| H | 1.33270  | -6.74714 | -7.22222  |
| H | 2.04954  | -2.34651 | -8.85237  |
| H | 0.87471  | -1.73056 | -10.02356 |
| H | 0.32599  | -2.66654 | -8.63476  |
| H | 4.07198  | 0.78686  | -7.84425  |
| H | 3.44139  | 0.59766  | -9.47747  |
| H | 3.72911  | -0.82922 | -8.46817  |
| H | 5.56420  | -4.49619 | -7.56254  |
| H | 7.12965  | -3.66497 | -7.62770  |
| H | 5.71132  | -2.95971 | -8.42858  |
| H | -1.32164 | 2.31352  | -3.89167  |
| H | -1.74453 | 1.49905  | -2.38832  |
| H | -2.07011 | 0.71289  | -3.92826  |
| H | 6.07514  | -0.25739 | -5.12296  |
| H | 5.97154  | -0.28264 | -6.89371  |
| H | 7.42552  | -0.88130 | -6.08330  |
| H | 6.22189  | -2.99798 | -3.54345  |
| H | 7.49858  | -3.56096 | -4.63881  |
| H | 6.03318  | -4.53028 | -4.41392  |
| H | -1.87784 | 1.77909  | -6.24514  |
| H | -1.42617 | 2.72971  | -7.65601  |
| H | -0.61804 | 3.00924  | -6.11764  |
| H | 1.85463  | -2.93254 | -2.44740  |
| H | 2.26020  | -1.94878 | -1.03725  |
| H | 3.37617  | -2.05227 | -2.41136  |
| H | 2.95102  | -6.78140 | -3.24119  |
| H | 0.68128  | 3.29642  | -4.25037  |
| H | 2.42538  | 3.02412  | -4.25668  |
| H | 1.58508  | 3.32904  | -2.74075  |
| H | -1.72362 | -1.49872 | -2.92832  |
| H | -1.06365 | -1.29509 | -1.30396  |
| H | -0.46755 | -2.58855 | -2.34458  |
| H | -1.66459 | -1.72794 | -7.93006  |
| H | -2.09592 | -0.27802 | -8.83932  |
| H | -2.35658 | -0.33975 | -7.09617  |
| H | 1.79332  | -7.96063 | -5.10025  |

96

1 - N3SiMe3 coordination

|   |          |          |          |
|---|----------|----------|----------|
| C | -0.58197 | 0.40369  | -3.19946 |
| C | -0.70716 | -1.01658 | -3.16720 |
| C | 0.48127  | -1.54569 | -2.58849 |
| C | 1.33450  | -0.45911 | -2.25301 |
| C | 0.67844  | 0.74597  | -2.63169 |
| C | -1.80430 | -1.80450 | -3.82085 |
| C | 0.87260  | -2.98944 | -2.49275 |
| C | 2.74195  | -0.60368 | -1.75784 |
| C | 1.28902  | 2.11599  | -2.68151 |
| C | -1.42868 | 1.33969  | -4.00954 |

|    |          |          |          |
|----|----------|----------|----------|
| U  | -0.83887 | -0.25928 | -0.49492 |
| N  | 1.03010  | 1.41888  | 0.37273  |
| N  | 1.58300  | 2.33485  | 0.78115  |
| N  | 2.08809  | 3.28754  | 1.32411  |
| P  | 0.69012  | -1.61855 | 1.46501  |
| Si | 2.68342  | -1.56879 | 2.52352  |
| C  | 3.75441  | -3.04590 | 1.98302  |
| C  | -1.96950 | -2.37258 | -0.54478 |
| Si | 3.43064  | 4.38120  | 0.78696  |
| C  | 3.90732  | 5.25934  | 2.37418  |
| C  | 2.72363  | 5.56284  | -0.49612 |
| C  | 4.83258  | 3.33836  | 0.08848  |
| C  | 0.09484  | -3.24860 | 2.11746  |
| C  | 0.29015  | -4.44007 | 1.39902  |
| C  | -0.14970 | -5.66645 | 1.89539  |
| C  | -0.79600 | -5.73431 | 3.12883  |
| C  | -0.99624 | -4.56470 | 3.86009  |
| C  | -0.55716 | -3.33949 | 3.35899  |
| C  | 2.46725  | -1.66826 | 4.41121  |
| C  | 3.65490  | 0.02531  | 2.15122  |
| C  | -3.50357 | 0.20950  | 0.23092  |
| C  | -2.73582 | 0.32226  | 1.42379  |
| C  | -1.94364 | 1.50047  | 1.33158  |
| C  | -2.20375 | 2.10526  | 0.06552  |
| C  | -3.17713 | 1.31148  | -0.60695 |
| C  | -4.64448 | -0.73563 | 0.00588  |
| C  | -2.88493 | -0.52991 | 2.64827  |
| C  | -1.15473 | 2.07816  | 2.47170  |
| C  | -1.70533 | 3.44334  | -0.39879 |
| C  | -3.95639 | 1.70279  | -1.82788 |
| H  | -1.28501 | -3.17987 | -0.83260 |
| H  | -2.83665 | -2.41536 | -1.21729 |
| H  | -2.32634 | -2.61591 | 0.46597  |
| H  | -0.46587 | 1.34757  | 2.90924  |
| H  | -1.83092 | 2.40757  | 3.27150  |
| H  | -0.57411 | 2.95496  | 2.17353  |
| H  | 0.60231  | 2.89858  | -2.34134 |
| H  | 1.58009  | 2.37256  | -3.70910 |
| H  | 2.19432  | 2.17570  | -2.07133 |
| H  | 0.79505  | -4.40040 | 0.43850  |
| H  | -0.71733 | -2.43466 | 3.93747  |
| H  | 5.14901  | 2.57615  | 0.80583  |
| H  | 5.69343  | 3.97974  | -0.13110 |
| H  | 4.54547  | 2.83888  | -0.84176 |
| H  | 0.01485  | -6.57172 | 1.31593  |
| H  | 1.37605  | -3.20451 | -1.54533 |
| H  | 1.56616  | -3.25435 | -3.30241 |
| H  | 0.01052  | -3.65547 | -2.57388 |
| H  | 3.11230  | 0.31778  | -1.30025 |
| H  | 3.42380  | -0.85366 | -2.58233 |
| H  | 2.81778  | -1.39576 | -1.00722 |
| H  | 3.20738  | -3.98438 | 2.11300  |

|   |          |          |          |
|---|----------|----------|----------|
| H | 4.67176  | -3.10037 | 2.58133  |
| H | 4.03790  | -2.96380 | 0.92894  |
| H | -3.45068 | 2.47135  | -2.41531 |
| H | -4.93343 | 2.11207  | -1.53635 |
| H | -4.15753 | 0.85474  | -2.49042 |
| H | 3.15265  | 0.90679  | 2.56067  |
| H | 3.80222  | 0.16591  | 1.07681  |
| H | 4.64316  | -0.04386 | 2.62104  |
| H | 1.92919  | -0.79428 | 4.79154  |
| H | 3.44599  | -1.70988 | 4.90418  |
| H | 1.90618  | -2.56288 | 4.69570  |
| H | -2.45224 | 0.97882  | -4.13034 |
| H | -1.00790 | 1.45122  | -5.01899 |
| H | -1.47732 | 2.34309  | -3.57595 |
| H | 3.04722  | 5.78272  | 2.80177  |
| H | 4.69424  | 5.99615  | 2.18272  |
| H | 4.27847  | 4.54798  | 3.11745  |
| H | -3.05746 | -1.58179 | 2.40412  |
| H | -3.73614 | -0.19166 | 3.25573  |
| H | -1.98966 | -0.48523 | 3.27246  |
| H | -1.49714 | -4.60366 | 4.82449  |
| H | -1.54626 | 3.47057  | -1.48164 |
| H | -0.76209 | 3.72138  | 0.07979  |
| H | -2.42637 | 4.23776  | -0.16322 |
| H | -4.78892 | -0.96420 | -1.05436 |
| H | -5.58238 | -0.29559 | 0.37171  |
| H | -4.50227 | -1.68356 | 0.52939  |
| H | -1.88594 | -2.81048 | -3.40295 |
| H | -1.62252 | -1.90884 | -4.89903 |
| H | -2.78198 | -1.32490 | -3.70592 |
| H | 2.38756  | 5.02811  | -1.38928 |
| H | 3.49077  | 6.28224  | -0.80324 |
| H | 1.87645  | 6.12315  | -0.09010 |
| H | -1.13933 | -6.68973 | 3.51671  |

96

From 1 - N-P coupling TS

|    |          |          |          |
|----|----------|----------|----------|
| C  | -0.73008 | 0.23819  | -3.73484 |
| C  | -0.73954 | -1.18708 | -3.65817 |
| C  | 0.47745  | -1.60281 | -3.05245 |
| C  | 1.22526  | -0.43606 | -2.72567 |
| C  | 0.48040  | 0.70063  | -3.14869 |
| C  | -1.76715 | -2.09177 | -4.27289 |
| C  | 0.97223  | -3.01417 | -2.94870 |
| C  | 2.64121  | -0.41274 | -2.23700 |
| C  | 0.97543  | 2.11596  | -3.18740 |
| C  | -1.63205 | 1.07894  | -4.58868 |
| U  | -0.95526 | -0.35013 | -1.01323 |
| N  | 0.34408  | 1.46284  | -0.15808 |
| N  | 1.15847  | 1.97694  | 0.54165  |
| N  | 1.94752  | 1.55924  | 1.43389  |
| P  | 1.12008  | -0.94825 | 1.00010  |
| Si | 3.16929  | -1.91768 | 1.42149  |

|    |          |          |          |
|----|----------|----------|----------|
| C  | 3.18611  | -3.66963 | 0.68458  |
| C  | -1.40364 | -2.71305 | -0.65688 |
| Si | 2.99330  | 2.79365  | 2.25400  |
| C  | 3.87182  | 1.87910  | 3.64529  |
| C  | 1.90382  | 4.17007  | 2.95182  |
| C  | 4.23071  | 3.49883  | 1.01320  |
| C  | 0.34340  | -1.29067 | 2.64094  |
| C  | -0.16191 | -2.57516 | 2.90745  |
| C  | -0.72027 | -2.88203 | 4.14732  |
| C  | -0.80315 | -1.90815 | 5.14219  |
| C  | -0.31888 | -0.62593 | 4.88738  |
| C  | 0.25272  | -0.32122 | 3.65187  |
| C  | 3.42136  | -2.07534 | 3.29462  |
| C  | 4.62770  | -0.93595 | 0.70409  |
| C  | -3.69965 | -0.53818 | -0.48956 |
| C  | -3.10682 | -0.12904 | 0.73870  |
| C  | -2.62010 | 1.19700  | 0.57092  |
| C  | -2.90962 | 1.60706  | -0.76420 |
| C  | -3.59751 | 0.54210  | -1.41202 |
| C  | -4.52583 | -1.77203 | -0.69727 |
| C  | -3.20341 | -0.87326 | 2.03684  |
| C  | -2.11176 | 2.09093  | 1.66361  |
| C  | -2.67511 | 2.98894  | -1.30135 |
| C  | -4.37393 | 0.62205  | -2.69341 |
| H  | -0.50479 | -3.33510 | -0.74080 |
| H  | -2.13003 | -3.08219 | -1.39722 |
| H  | -1.83354 | -2.90492 | 0.33541  |
| H  | -1.52786 | 1.54326  | 2.40847  |
| H  | -2.95095 | 2.56242  | 2.19352  |
| H  | -1.48202 | 2.89241  | 1.27040  |
| H  | 0.17002  | 2.83820  | -3.02499 |
| H  | 1.42449  | 2.34388  | -4.16416 |
| H  | 1.73610  | 2.29942  | -2.42522 |
| H  | -0.11936 | -3.33647 | 2.13359  |
| H  | 0.64233  | 0.67322  | 3.45854  |
| H  | 4.86658  | 2.71222  | 0.59600  |
| H  | 4.87930  | 4.24045  | 1.49252  |
| H  | 3.71020  | 3.99029  | 0.18544  |
| H  | -1.09938 | -3.88391 | 4.33223  |
| H  | 1.53667  | -3.18584 | -2.02807 |
| H  | 1.63581  | -3.25337 | -3.79065 |
| H  | 0.15224  | -3.73580 | -2.96491 |
| H  | 2.82678  | 0.40333  | -1.53300 |
| H  | 3.34259  | -0.28847 | -3.07378 |
| H  | 2.90073  | -1.34864 | -1.73716 |
| H  | 2.34135  | -4.26104 | 1.04991  |
| H  | 4.10995  | -4.18391 | 0.97520  |
| H  | 3.13998  | -3.65349 | -0.40809 |
| H  | -4.07029 | 1.46833  | -3.31143 |
| H  | -5.44230 | 0.75205  | -2.47318 |
| H  | -4.28964 | -0.28511 | -3.30055 |
| H  | 4.55184  | 0.12222  | 0.96471  |



|   |          |          |          |
|---|----------|----------|----------|
| H | 4.69257  | -1.01420 | -0.38309 |
| H | 5.56027  | -1.32885 | 1.12568  |
| H | 3.37590  | -1.10623 | 3.79670  |
| H | 4.40782  | -2.51513 | 3.48407  |
| H | 2.66487  | -2.72232 | 3.74529  |
| H | -2.58386 | 0.58716  | -4.79547 |
| H | -1.15262 | 1.27042  | -5.55871 |
| H | -1.84468 | 2.05592  | -4.14508 |
| H | 3.15433  | 1.42359  | 4.33405  |
| H | 4.48743  | 2.58201  | 4.21675  |
| H | 4.52853  | 1.09275  | 3.26403  |
| H | -3.09208 | -1.95284 | 1.90650  |
| H | -4.18628 | -0.70425 | 2.49796  |
| H | -2.44797 | -0.55169 | 2.75683  |
| H | -0.38037 | 0.14144  | 5.65513  |
| H | -2.78247 | 3.02908  | -2.38839 |
| H | -1.67440 | 3.35691  | -1.05259 |
| H | -3.39704 | 3.70245  | -0.88195 |
| H | -4.49669 | -2.11947 | -1.73472 |
| H | -5.57944 | -1.57698 | -0.45314 |
| H | -4.19227 | -2.59867 | -0.06576 |
| H | -1.82039 | -3.05552 | -3.75957 |
| H | -1.53348 | -2.29689 | -5.32637 |
| H | -2.76895 | -1.65258 | -4.24890 |
| H | 1.36658  | 4.68712  | 2.15105  |
| H | 2.51079  | 4.90950  | 3.48595  |
| H | 1.16511  | 3.76854  | 3.65207  |
| H | -1.24413 | -2.14592 | 6.10630  |

96

From 1 - N-P coupling product

|    |          |          |          |
|----|----------|----------|----------|
| C  | -0.63372 | 0.48398  | -3.74570 |
| C  | -0.64679 | -0.94160 | -3.67463 |
| C  | 0.56573  | -1.36532 | -3.06095 |
| C  | 1.31780  | -0.20164 | -2.73019 |
| C  | 0.57946  | 0.93793  | -3.15192 |
| C  | -1.67061 | -1.86208 | -4.27477 |
| C  | 1.04260  | -2.78480 | -2.98935 |
| C  | 2.71721  | -0.17564 | -2.19258 |
| C  | 1.06401  | 2.35700  | -3.14799 |
| C  | -1.54672 | 1.34645  | -4.56780 |
| U  | -0.90238 | -0.11458 | -1.05335 |
| N  | 0.32767  | 1.48841  | -0.16196 |
| N  | 1.18111  | 2.06708  | 0.47412  |
| N  | 1.92732  | 1.26772  | 1.47417  |
| P  | 1.54239  | -0.42172 | 1.49356  |
| Si | 3.48774  | -1.66220 | 1.75652  |
| C  | 3.14814  | -3.30133 | 0.86233  |
| C  | -0.91361 | -2.46289 | -0.39011 |
| Si | 2.99991  | 2.44733  | 2.32776  |
| C  | 3.86307  | 1.63506  | 3.79853  |
| C  | 1.94309  | 3.87865  | 2.97013  |
| C  | 4.26474  | 3.13125  | 1.10242  |

|   |          |          |          |
|---|----------|----------|----------|
| C | 0.68901  | -0.75538 | 3.09240  |
| C | 0.29643  | -2.07325 | 3.38096  |
| C | -0.36796 | -2.37650 | 4.56702  |
| C | -0.67330 | -1.36675 | 5.48023  |
| C | -0.31140 | -0.05216 | 5.19240  |
| C | 0.36515  | 0.25095  | 4.01046  |
| C | 3.89184  | -2.07559 | 3.56173  |
| C | 4.95176  | -0.80404 | 0.91440  |
| C | -3.57288 | -0.43282 | -0.47740 |
| C | -2.99609 | -0.01524 | 0.75364  |
| C | -2.58029 | 1.33897  | 0.60891  |
| C | -2.91468 | 1.76321  | -0.71029 |
| C | -3.54036 | 0.67507  | -1.38008 |
| C | -4.27129 | -1.73577 | -0.73629 |
| C | -2.99834 | -0.79162 | 2.03693  |
| C | -2.08918 | 2.23274  | 1.70856  |
| C | -2.74371 | 3.16390  | -1.22082 |
| C | -4.31541 | 0.73755  | -2.66395 |
| H | 0.08635  | -2.91336 | -0.42415 |
| H | -1.56464 | -3.07005 | -1.03851 |
| H | -1.28171 | -2.58258 | 0.63833  |
| H | -1.55988 | 1.67019  | 2.48203  |
| H | -2.93082 | 2.74328  | 2.19694  |
| H | -1.40937 | 3.00215  | 1.33397  |
| H | 0.23995  | 3.06680  | -3.03204 |
| H | 1.57296  | 2.59857  | -4.09152 |
| H | 1.76705  | 2.54349  | -2.33291 |
| H | 0.49475  | -2.86717 | 2.66468  |
| H | 0.63723  | 1.27797  | 3.78894  |
| H | 4.90991  | 2.34578  | 0.69879  |
| H | 4.90196  | 3.88239  | 1.58240  |
| H | 3.74664  | 3.60909  | 0.26599  |
| H | -0.65920 | -3.40336 | 4.77192  |
| H | 1.76922  | -2.93694 | -2.18665 |
| H | 1.53415  | -3.07474 | -3.92812 |
| H | 0.22187  | -3.48683 | -2.81998 |
| H | 2.87467  | 0.66024  | -1.50462 |
| H | 3.44945  | -0.07314 | -3.00509 |
| H | 2.95809  | -1.09874 | -1.65880 |
| H | 2.30629  | -3.84186 | 1.30517  |
| H | 4.03137  | -3.94730 | 0.92689  |
| H | 2.92108  | -3.13960 | -0.19460 |
| H | -4.03775 | 1.59951  | -3.27312 |
| H | -5.38922 | 0.82728  | -2.45035 |
| H | -4.19341 | -0.16011 | -3.27844 |
| H | 5.28810  | 0.07433  | 1.46995  |
| H | 4.70332  | -0.48990 | -0.10197 |
| H | 5.79076  | -1.50691 | 0.85637  |
| H | 4.20702  | -1.20118 | 4.13438  |
| H | 4.70569  | -2.80993 | 3.58328  |
| H | 3.02585  | -2.51460 | 4.06487  |
| H | -2.48691 | 0.84503  | -4.80488 |

|   |          |          |          |
|---|----------|----------|----------|
| H | -1.06751 | 1.59876  | -5.52354 |
| H | -1.78765 | 2.29427  | -4.07653 |
| H | 3.15918  | 1.09164  | 4.43515  |
| H | 4.31708  | 2.42763  | 4.40471  |
| H | 4.66372  | 0.95383  | 3.50146  |
| H | -3.04737 | -1.86932 | 1.86262  |
| H | -3.87373 | -0.52297 | 2.64361  |
| H | -2.11330 | -0.59597 | 2.64754  |
| H | -0.55452 | 0.74475  | 5.89053  |
| H | -2.88563 | 3.22615  | -2.30293 |
| H | -1.74826 | 3.55679  | -0.99084 |
| H | -3.47599 | 3.84144  | -0.76186 |
| H | -4.18737 | -2.04568 | -1.78321 |
| H | -5.34410 | -1.66023 | -0.51152 |
| H | -3.86501 | -2.54413 | -0.12315 |
| H | -1.90222 | -2.70535 | -3.61488 |
| H | -1.31351 | -2.28872 | -5.22167 |
| H | -2.60884 | -1.34465 | -4.49261 |
| H | 1.41168  | 4.36132  | 2.14615  |
| H | 2.58245  | 4.62621  | 3.45365  |
| H | 1.20250  | 3.54836  | 3.70494  |
| H | -1.19714 | -1.60200 | 6.40230  |

96

From 1 - N-N activation TS

|    |          |         |          |
|----|----------|---------|----------|
| C  | -1.42061 | 3.41721 | 8.51110  |
| C  | -0.70765 | 4.61711 | 8.79560  |
| C  | -1.49564 | 5.71564 | 8.35532  |
| C  | -2.70042 | 5.20008 | 7.79535  |
| C  | -2.65832 | 3.77780 | 7.90615  |
| C  | 0.69986  | 4.71341 | 9.30347  |
| C  | -1.06127 | 7.14980 | 8.29971  |
| C  | -3.65408 | 6.00618 | 6.96246  |
| C  | -3.65313 | 2.80298 | 7.34411  |
| C  | -0.89068 | 2.01851 | 8.61177  |
| C  | 2.97920  | 4.21693 | 12.36599 |
| Si | 1.54202  | 3.35595 | 13.24987 |
| C  | 1.23528  | 1.67500 | 12.42243 |
| P  | -0.42039 | 4.57007 | 12.99159 |
| C  | -1.25014 | 4.22277 | 14.60344 |
| C  | -1.60752 | 2.89999 | 14.91247 |
| C  | -2.24265 | 2.59441 | 16.11408 |
| C  | -2.55309 | 3.60690 | 17.02260 |
| C  | -2.22543 | 4.92615 | 16.71502 |
| C  | -1.57768 | 5.23125 | 15.51753 |
| U  | -2.90228 | 4.66373 | 10.50338 |
| N  | -1.73616 | 6.39933 | 11.30120 |
| N  | -0.91024 | 7.03849 | 11.88554 |
| C  | -2.82403 | 2.34040 | 11.22823 |
| C  | 1.98217  | 3.01798 | 15.06276 |
| N  | -0.06635 | 6.24043 | 12.94497 |
| Si | 0.97301  | 7.46856 | 13.74142 |
| C  | 2.18449  | 8.17535 | 12.47341 |

|   |          |         |          |
|---|----------|---------|----------|
| C | 1.91107  | 6.73789 | 15.21144 |
| C | -0.11726 | 8.88100 | 14.37439 |
| C | -4.97921 | 4.73665 | 12.32931 |
| C | -4.61714 | 6.10087 | 12.13934 |
| C | -4.98250 | 6.47228 | 10.81248 |
| C | -5.57156 | 5.34074 | 10.18223 |
| C | -5.55187 | 4.26029 | 11.11788 |
| C | -4.15063 | 7.04429 | 13.20787 |
| C | -4.87298 | 7.86268 | 10.25893 |
| C | -6.36669 | 5.33566 | 8.90892  |
| C | -6.20294 | 2.92500 | 10.90407 |
| C | -4.94104 | 4.00234 | 13.63613 |
| H | -1.80999 | 1.92142 | 11.21930 |
| H | -3.44068 | 1.70886 | 10.56889 |
| H | -3.21403 | 2.21466 | 12.24734 |
| H | -3.56318 | 6.53213 | 13.97427 |
| H | -5.00847 | 7.50956 | 13.71283 |
| H | -3.53336 | 7.84819 | 12.79944 |
| H | -1.90542 | 7.83519 | 8.41749  |
| H | -0.58929 | 7.37570 | 7.33344  |
| H | -0.34023 | 7.38729 | 9.08500  |
| H | -1.40342 | 2.10328 | 14.20102 |
| H | -1.32917 | 6.26094 | 15.28013 |
| H | 2.84939  | 7.40508 | 12.07213 |
| H | 2.80405  | 8.95981 | 12.92226 |
| H | 1.63182  | 8.61542 | 11.63810 |
| H | -2.50630 | 1.56350 | 16.33566 |
| H | -0.13791 | 1.91702 | 9.39784  |
| H | -0.41409 | 1.71833 | 7.66865  |
| H | -1.68006 | 1.29261 | 8.82426  |
| H | 0.83244  | 5.55657 | 9.98773  |
| H | 1.40695  | 4.85021 | 8.47403  |
| H | 0.99708  | 3.80414 | 9.83184  |
| H | 0.42635  | 1.12192 | 12.90894 |
| H | 2.14262  | 1.06317 | 12.48614 |
| H | 0.97543  | 1.78806 | 11.36681 |
| H | -6.13080 | 6.18849 | 8.27028  |
| H | -7.43968 | 5.39231 | 9.13744  |
| H | -6.22111 | 4.42483 | 8.31952  |
| H | 2.73625  | 4.44696 | 11.32626 |
| H | 3.85029  | 3.55169 | 12.37196 |
| H | 3.26365  | 5.14746 | 12.86200 |
| H | 2.27784  | 3.92173 | 15.59920 |
| H | 2.81929  | 2.31071 | 15.09714 |
| H | 1.13759  | 2.57033 | 15.59379 |
| H | -4.56609 | 5.45427 | 6.72797  |
| H | -3.18419 | 6.27202 | 6.00592  |
| H | -3.94513 | 6.94579 | 7.44207  |
| H | 1.24546  | 6.19422 | 15.88789 |
| H | 2.35968  | 7.56336 | 15.77646 |
| H | 2.72245  | 6.07077 | 14.91009 |
| H | -4.95781 | 2.91857 | 13.49702 |

|   |          |         |          |
|---|----------|---------|----------|
| H | -5.81776 | 4.26287 | 14.24436 |
| H | -4.05590 | 4.24507 | 14.22911 |
| H | -2.47198 | 5.72453 | 17.41036 |
| H | -5.04704 | 7.88892 | 9.18012  |
| H | -3.88550 | 8.29466 | 10.44947 |
| H | -5.61492 | 8.52801 | 10.71988 |
| H | -6.09701 | 2.57627 | 9.87131  |
| H | -7.28004 | 2.97375 | 11.11482 |
| H | -5.77722 | 2.15604 | 11.55342 |
| H | -3.83800 | 1.96476 | 8.02458  |
| H | -3.29415 | 2.37190 | 6.39999  |
| H | -4.61591 | 3.27566 | 7.13234  |
| H | -0.69651 | 9.31210 | 13.55380 |
| H | 0.50615  | 9.67125 | 14.80835 |
| H | -0.81780 | 8.54735 | 15.14615 |
| H | -3.05352 | 3.36979 | 17.95718 |

96

From 1 - N-N activation product

|    |          |          |          |
|----|----------|----------|----------|
| C  | 0.94322  | -1.09437 | -2.76249 |
| C  | 1.35980  | 0.25131  | -2.54485 |
| C  | 0.35075  | 1.10802  | -3.07302 |
| C  | -0.67923 | 0.29840  | -3.62946 |
| C  | -0.32148 | -1.06776 | -3.42175 |
| C  | 2.70242  | 0.70024  | -2.03849 |
| C  | 0.46337  | 2.59476  | -3.24777 |
| C  | -1.72169 | 0.79506  | -4.58680 |
| C  | -1.04877 | -2.25699 | -3.98125 |
| C  | 1.78506  | -2.31483 | -2.53980 |
| C  | 4.62790  | -1.29339 | 0.52551  |
| Si | 3.16768  | -1.85056 | 1.59835  |
| C  | 2.66927  | -3.61555 | 1.08377  |
| P  | 1.52874  | -0.18075 | 1.44317  |
| C  | 0.60410  | -0.60380 | 3.00733  |
| C  | 0.11532  | -1.89381 | 3.26143  |
| C  | -0.53202 | -2.18960 | 4.45959  |
| C  | -0.72117 | -1.19384 | 5.41930  |
| C  | -0.25052 | 0.09548  | 5.17223  |
| C  | 0.41255  | 0.38540  | 3.97918  |
| U  | -0.87133 | -0.19390 | -0.91484 |
| N  | 0.16606  | 1.90134  | -0.17367 |
| N  | 0.82929  | 2.71120  | 0.22163  |
| C  | -0.82105 | -2.51666 | -0.29474 |
| C  | 3.71636  | -1.93959 | 3.41124  |
| N  | 2.32596  | 1.19172  | 1.62396  |
| Si | 3.35644  | 2.39086  | 2.27888  |
| C  | 4.37956  | 3.18383  | 0.88466  |
| C  | 4.59314  | 1.76473  | 3.58775  |
| C  | 2.38397  | 3.80306  | 3.11285  |
| C  | -2.99089 | -0.11126 | 0.86237  |
| C  | -2.70129 | 1.25622  | 0.59536  |
| C  | -3.04572 | 1.52025  | -0.76527 |
| C  | -3.55632 | 0.31745  | -1.33149 |

|   |          |          |          |
|---|----------|----------|----------|
| C | -3.50394 | -0.69700 | -0.32866 |
| C | -2.32998 | 2.27731  | 1.63126  |
| C | -3.04620 | 2.87639  | -1.40827 |
| C | -4.32518 | 0.18310  | -2.61294 |
| C | -4.11097 | -2.06310 | -0.45360 |
| C | -2.96882 | -0.75099 | 2.21636  |
| H | 0.21473  | -2.87426 | -0.23528 |
| H | -1.34696 | -3.14972 | -1.02503 |
| H | -1.28233 | -2.70052 | 0.68388  |
| H | -1.60065 | 1.89412  | 2.35053  |
| H | -3.21892 | 2.57672  | 2.20192  |
| H | -1.91442 | 3.18397  | 1.18552  |
| H | -0.49781 | 3.10326  | -3.12630 |
| H | 0.82499  | 2.83351  | -4.25703 |
| H | 1.16478  | 3.03928  | -2.53863 |
| H | 0.24683  | -2.67785 | 2.52044  |
| H | 0.80849  | 1.37984  | 3.79205  |
| H | 5.00455  | 2.44132  | 0.37699  |
| H | 5.03959  | 3.96625  | 1.27675  |
| H | 3.72569  | 3.64008  | 0.13443  |
| H | -0.89049 | -3.19931 | 4.64471  |
| H | 2.44957  | -2.20011 | -1.68123 |
| H | 2.41781  | -2.50768 | -3.41648 |
| H | 1.18028  | -3.20998 | -2.37405 |
| H | 2.71305  | 0.99136  | -0.98090 |
| H | 3.05763  | 1.55995  | -2.61624 |
| H | 3.44244  | -0.09431 | -2.16371 |
| H | 1.88766  | -4.02850 | 1.72748  |
| H | 3.55192  | -4.25861 | 1.18842  |
| H | 2.33049  | -3.68560 | 0.04756  |
| H | -4.15211 | 1.01888  | -3.29181 |
| H | -5.40168 | 0.16152  | -2.39670 |
| H | -4.09759 | -0.74160 | -3.15306 |
| H | 4.44511  | -1.46149 | -0.53921 |
| H | 5.52661  | -1.85461 | 0.80472  |
| H | 4.82369  | -0.22864 | 0.67441  |
| H | 4.00181  | -0.95572 | 3.78801  |
| H | 4.58243  | -2.60643 | 3.49766  |
| H | 2.91678  | -2.32974 | 4.04663  |
| H | -2.52382 | 0.07178  | -4.74445 |
| H | -1.26138 | 0.98121  | -5.56680 |
| H | -2.17440 | 1.73860  | -4.26883 |
| H | 4.07822  | 1.33225  | 4.45223  |
| H | 5.20624  | 2.59830  | 3.95111  |
| H | 5.27157  | 1.00788  | 3.18079  |
| H | -2.77193 | -1.82433 | 2.16683  |
| H | -3.94409 | -0.62392 | 2.70563  |
| H | -2.21567 | -0.30857 | 2.87082  |
| H | -0.38806 | 0.87610  | 5.91661  |
| H | -3.02953 | 2.81220  | -2.49933 |
| H | -2.18930 | 3.48229  | -1.09877 |
| H | -3.94954 | 3.43712  | -1.13410 |

|   |          |          |          |
|---|----------|----------|----------|
| H | -3.98124 | -2.48391 | -1.45572 |
| H | -5.19153 | -2.02519 | -0.25985 |
| H | -3.67644 | -2.76920 | 0.25772  |
| H | -0.82579 | -3.16963 | -3.42263 |
| H | -0.75976 | -2.43707 | -5.02519 |
| H | -2.13555 | -2.12265 | -3.97200 |
| H | 1.64716  | 4.23426  | 2.42872  |
| H | 3.06743  | 4.60402  | 3.41910  |
| H | 1.85564  | 3.46517  | 4.01102  |
| H | -1.22657 | -1.42338 | 6.35344  |

94

From 1 - SiMe3 transf. adduct

|    |          |          |          |
|----|----------|----------|----------|
| C  | 1.54054  | 0.90708  | -2.54493 |
| C  | 1.21932  | -0.46531 | -2.74145 |
| C  | -0.07174 | -0.53865 | -3.33410 |
| C  | -0.54495 | 0.79095  | -3.50933 |
| C  | 0.44210  | 1.68626  | -3.00804 |
| C  | 2.18362  | -1.59921 | -2.56960 |
| C  | -0.71370 | -1.76746 | -3.90708 |
| C  | -1.68664 | 1.18181  | -4.39977 |
| C  | 0.43641  | 3.17142  | -3.23080 |
| C  | 2.90786  | 1.40022  | -2.17712 |
| U  | -0.42453 | 0.31934  | -0.65052 |
| C  | -0.72606 | -2.04633 | -0.60904 |
| N  | 1.16830  | 0.37005  | 1.00081  |
| P  | 1.95038  | -0.69010 | 2.18001  |
| Si | 3.33134  | -2.36322 | 1.42854  |
| C  | 3.98204  | -3.02185 | 3.09108  |
| Si | 1.78233  | 1.98814  | 1.50573  |
| C  | 1.30517  | 2.46183  | 3.28536  |
| C  | 1.07208  | 3.31459  | 0.32376  |
| C  | 3.66807  | 2.18811  | 1.43155  |
| C  | 0.69348  | -1.63999 | 3.15469  |
| C  | 0.09098  | -2.84235 | 2.75340  |
| C  | -0.77083 | -3.53484 | 3.60469  |
| C  | -1.04450 | -3.03943 | 4.87909  |
| C  | -0.44439 | -1.85396 | 5.30134  |
| C  | 0.41902  | -1.16779 | 4.44895  |
| C  | 4.78658  | -1.54299 | 0.52246  |
| C  | 2.73748  | -3.87442 | 0.43269  |
| C  | -2.45690 | 0.61371  | 1.23128  |
| C  | -2.29967 | 1.91431  | 0.66880  |
| C  | -2.78541 | 1.87917  | -0.67035 |
| C  | -3.24391 | 0.55597  | -0.93082 |
| C  | -3.04725 | -0.22132 | 0.24543  |
| C  | -3.02325 | 3.09988  | -1.51107 |
| C  | -2.03148 | 3.16534  | 1.45515  |
| C  | -2.27301 | 0.26662  | 2.67700  |
| C  | -3.63288 | -1.58085 | 0.47926  |
| C  | -4.03771 | 0.08490  | -2.11360 |
| H  | 0.24324  | -2.52821 | -0.80147 |
| H  | -1.44748 | -2.46599 | -1.31973 |

|   |          |          |          |
|---|----------|----------|----------|
| H | -1.05110 | -2.34540 | 0.39401  |
| H | -1.22411 | 3.04794  | 2.18135  |
| H | -2.92963 | 3.45221  | 2.01949  |
| H | -1.77655 | 4.01109  | 0.81138  |
| H | -0.56647 | 3.59904  | -3.14337 |
| H | 0.79571  | 3.40993  | -4.24141 |
| H | 1.08281  | 3.70393  | -2.52935 |
| H | 0.29696  | -3.24208 | 1.76703  |
| H | 0.89706  | -0.25319 | 4.78916  |
| H | 0.87616  | 4.22535  | 0.89967  |
| H | 0.12627  | 3.07146  | -0.17561 |
| H | 1.80318  | 3.56388  | -0.44820 |
| H | -1.22381 | -4.46551 | 3.27249  |
| H | 2.69412  | -1.57059 | -1.60326 |
| H | 2.96308  | -1.56590 | -3.34307 |
| H | 1.68836  | -2.56965 | -2.65406 |
| H | 2.91531  | 2.46533  | -1.93567 |
| H | 3.60225  | 1.25972  | -3.01711 |
| H | 3.32312  | 0.86056  | -1.32189 |
| H | 2.09397  | -4.51612 | 1.04120  |
| H | 3.61600  | -4.46513 | 0.14562  |
| H | 2.19730  | -3.61268 | -0.47884 |
| H | -4.04888 | 0.81979  | -2.91986 |
| H | -5.08227 | -0.09174 | -1.82392 |
| H | -3.66476 | -0.85945 | -2.52595 |
| H | 4.51599  | -1.14077 | -0.45721 |
| H | 5.58034  | -2.28327 | 0.36963  |
| H | 5.19878  | -0.72547 | 1.12089  |
| H | 4.42149  | -2.22229 | 3.69432  |
| H | 4.75620  | -3.77603 | 2.90795  |
| H | 3.18506  | -3.49070 | 3.67553  |
| H | -2.47548 | 0.42740  | -4.42066 |
| H | -1.32865 | 1.29454  | -5.43297 |
| H | -2.13674 | 2.13706  | -4.11941 |
| H | 3.92149  | 3.22005  | 1.70451  |
| H | 4.08156  | 1.99468  | 0.43887  |
| H | 4.15493  | 1.52234  | 2.14879  |
| H | -2.09201 | -0.79992 | 2.82730  |
| H | -3.17050 | 0.53111  | 3.25361  |
| H | -1.43163 | 0.80094  | 3.12271  |
| H | -0.64266 | -1.46675 | 6.29738  |
| H | -3.28867 | 2.84575  | -2.53896 |
| H | -2.15392 | 3.76497  | -1.54870 |
| H | -3.85542 | 3.69037  | -1.10458 |
| H | -3.56607 | -2.22215 | -0.40379 |
| H | -4.69714 | -1.49324 | 0.73789  |
| H | -3.14325 | -2.10409 | 1.30462  |
| H | -0.38460 | -2.67730 | -3.39969 |
| H | -0.46245 | -1.87707 | -4.97077 |
| H | -1.80576 | -1.73520 | -3.83985 |
| H | 0.27239  | 2.21215  | 3.54174  |
| H | 1.43699  | 3.54156  | 3.42443  |



|                           |          |          |          |
|---------------------------|----------|----------|----------|
| H                         | 1.96038  | 1.94990  | 3.99536  |
| H                         | -1.71413 | -3.57984 | 5.54291  |
| 94                        |          |          |          |
| From 1 - SiMe3 transf. TS |          |          |          |
| C                         | 1.86187  | 0.50048  | -2.39345 |
| C                         | 1.46086  | -0.83585 | -2.67305 |
| C                         | 0.20211  | -0.79069 | -3.33440 |
| C                         | -0.17243 | 0.57596  | -3.46637 |
| C                         | 0.84303  | 1.37405  | -2.86742 |
| C                         | 2.32544  | -2.04586 | -2.48468 |
| C                         | -0.49866 | -1.94829 | -3.98282 |
| C                         | -1.25692 | 1.08314  | -4.37027 |
| C                         | 0.93318  | 2.87139  | -2.95096 |
| C                         | 3.22371  | 0.89480  | -1.89997 |
| U                         | -0.26583 | -0.03178 | -0.64262 |
| C                         | -0.65372 | -2.42730 | -0.62364 |
| N                         | 1.21842  | -0.12140 | 0.93137  |
| P                         | 2.20140  | -0.76031 | 2.12603  |
| Si                        | 3.86385  | -2.31502 | 1.66003  |
| C                         | 4.71240  | -2.60249 | 3.33230  |
| Si                        | 2.29984  | 1.54355  | 2.11876  |
| C                         | 1.43022  | 1.97020  | 3.75402  |
| C                         | 1.79025  | 2.81992  | 0.80615  |
| C                         | 4.17086  | 1.89392  | 2.30359  |
| C                         | 1.30220  | -1.71475 | 3.42255  |
| C                         | 0.32684  | -2.65965 | 3.07818  |
| C                         | -0.30089 | -3.41696 | 4.06519  |
| C                         | 0.03431  | -3.23733 | 5.40769  |
| C                         | 1.00056  | -2.29643 | 5.76009  |
| C                         | 1.63017  | -1.53807 | 4.77363  |
| C                         | 5.15230  | -1.62155 | 0.45715  |
| C                         | 3.13028  | -3.94042 | 1.02337  |
| C                         | -2.32615 | 0.32043  | 1.19427  |
| C                         | -2.05159 | 1.63199  | 0.70667  |
| C                         | -2.50746 | 1.70733  | -0.64128 |
| C                         | -3.05693 | 0.44075  | -0.98500 |
| C                         | -2.94930 | -0.41369 | 0.14963  |
| C                         | -2.60627 | 2.98108  | -1.42914 |
| C                         | -1.68012 | 2.81023  | 1.56043  |
| C                         | -2.18304 | -0.12390 | 2.61919  |
| C                         | -3.62648 | -1.74476 | 0.27848  |
| C                         | -3.82269 | 0.08480  | -2.22570 |
| H                         | 0.29466  | -2.96533 | -0.76868 |
| H                         | -1.33749 | -2.77488 | -1.41028 |
| H                         | -1.08240 | -2.77675 | 0.32517  |
| H                         | -0.94169 | 2.55944  | 2.32563  |
| H                         | -2.56638 | 3.19422  | 2.08545  |
| H                         | -1.27992 | 3.64070  | 0.97133  |
| H                         | -0.05138 | 3.32921  | -3.07889 |
| H                         | 1.54149  | 3.18191  | -3.81186 |
| H                         | 1.38705  | 3.31814  | -2.06128 |
| H                         | 0.05801  | -2.79555 | 2.03507  |

|   |          |          |          |
|---|----------|----------|----------|
| H | 2.38036  | -0.80402 | 5.05607  |
| H | 1.98441  | 3.82641  | 1.19997  |
| H | 0.73345  | 2.75736  | 0.53963  |
| H | 2.39125  | 2.69084  | -0.09534 |
| H | -1.05269 | -4.15030 | 3.78528  |
| H | 2.78408  | -2.07302 | -1.49218 |
| H | 3.14444  | -2.06263 | -3.21766 |
| H | 1.76163  | -2.97363 | -2.61072 |
| H | 3.36628  | 1.97827  | -1.94072 |
| H | 4.00367  | 0.45057  | -2.53244 |
| H | 3.41453  | 0.56921  | -0.87238 |
| H | 2.42585  | -4.35724 | 1.74843  |
| H | 3.93358  | -4.67022 | 0.86942  |
| H | 2.60577  | -3.80751 | 0.07402  |
| H | -3.75890 | 0.86556  | -2.98591 |
| H | -4.88717 | -0.05357 | -1.99356 |
| H | -3.47838 | -0.85179 | -2.68020 |
| H | 4.74330  | -1.40673 | -0.53216 |
| H | 5.95230  | -2.36127 | 0.33561  |
| H | 5.60386  | -0.70587 | 0.84991  |
| H | 5.12808  | -1.67382 | 3.73519  |
| H | 5.54016  | -3.30840 | 3.19808  |
| H | 4.02336  | -3.02110 | 4.07022  |
| H | -2.08185 | 0.37348  | -4.46619 |
| H | -0.85997 | 1.24504  | -5.38249 |
| H | -1.67295 | 2.03827  | -4.03977 |
| H | 4.33786  | 2.97077  | 2.42929  |
| H | 4.72624  | 1.58445  | 1.41176  |
| H | 4.59339  | 1.37126  | 3.16715  |
| H | -2.14560 | -1.21217 | 2.70737  |
| H | -3.03220 | 0.22200  | 3.22509  |
| H | -1.27267 | 0.26348  | 3.08374  |
| H | 1.26100  | -2.14687 | 6.80455  |
| H | -2.84950 | 2.79682  | -2.47775 |
| H | -1.68096 | 3.56635  | -1.40313 |
| H | -3.39998 | 3.62530  | -1.02673 |
| H | -3.55832 | -2.33593 | -0.63899 |
| H | -4.69413 | -1.61137 | 0.50179  |
| H | -3.20258 | -2.34721 | 1.08596  |
| H | -0.25578 | -2.89653 | -3.49709 |
| H | -0.21315 | -2.03914 | -5.03981 |
| H | -1.58794 | -1.84075 | -3.95631 |
| H | 0.46704  | 1.46736  | 3.86771  |
| H | 1.25798  | 3.05097  | 3.80963  |
| H | 2.06076  | 1.67949  | 4.59961  |
| H | -0.45820 | -3.82682 | 6.17612  |

94

Complex 3

|   |          |          |          |
|---|----------|----------|----------|
| C | 1.24739  | 0.80170  | -2.75462 |
| C | 1.05222  | -0.58645 | -3.00436 |
| C | -0.18432 | -0.74087 | -3.68933 |
| C | -0.74808 | 0.55258  | -3.87459 |

|    |          |          |          |
|----|----------|----------|----------|
| C  | 0.13477  | 1.50615  | -3.29398 |
| C  | 2.06195  | -1.66861 | -2.77176 |
| C  | -0.70186 | -2.00597 | -4.30669 |
| C  | -1.92920 | 0.83683  | -4.75528 |
| C  | 0.04193  | 3.00174  | -3.39853 |
| C  | 2.48432  | 1.43070  | -2.18383 |
| U  | -0.77435 | 0.05492  | -1.03460 |
| C  | -1.32278 | -2.32183 | -1.06075 |
| N  | 0.67820  | -0.11499 | 0.49837  |
| P  | 1.63749  | -0.35539 | 1.76812  |
| Si | 3.47031  | -1.74960 | 1.37472  |
| C  | 4.30985  | -2.23126 | 3.00674  |
| Si | 2.33774  | 1.63283  | 2.77741  |
| C  | 1.05536  | 2.26648  | 4.02007  |
| C  | 2.53652  | 2.86444  | 1.35962  |
| C  | 4.00364  | 1.44203  | 3.67137  |
| C  | 0.83725  | -1.37843 | 3.08643  |
| C  | -0.16948 | -2.27034 | 2.70059  |
| C  | -0.75355 | -3.12145 | 3.63783  |
| C  | -0.34255 | -3.08709 | 4.96988  |
| C  | 0.66064  | -2.20131 | 5.36219  |
| C  | 1.25043  | -1.35473 | 4.42445  |
| C  | 4.75992  | -0.90651 | 0.26861  |
| C  | 2.73610  | -3.29730 | 0.57558  |
| C  | -2.56938 | 0.77978  | 0.96999  |
| C  | -2.31315 | 1.96993  | 0.22936  |
| C  | -2.95857 | 1.85185  | -1.03615 |
| C  | -3.56902 | 0.56820  | -1.09202 |
| C  | -3.33661 | -0.08982 | 0.14957  |
| C  | -3.19883 | 2.99486  | -1.97768 |
| C  | -1.66538 | 3.21540  | 0.76218  |
| C  | -2.25943 | 0.57627  | 2.42200  |
| C  | -3.98496 | -1.37273 | 0.57519  |
| C  | -4.45536 | 0.03714  | -2.18113 |
| H  | -0.43361 | -2.91129 | -1.33144 |
| H  | -2.10060 | -2.57091 | -1.79857 |
| H  | -1.67887 | -2.71044 | -0.09712 |
| H  | -0.92576 | 2.98792  | 1.53494  |
| H  | -2.40376 | 3.89274  | 1.21434  |
| H  | -1.15527 | 3.78587  | -0.02189 |
| H  | -0.91436 | 3.31839  | -3.81977 |
| H  | 0.82879  | 3.39788  | -4.05402 |
| H  | 0.15524  | 3.50806  | -2.43186 |
| H  | -0.49309 | -2.27913 | 1.66330  |
| H  | 2.04031  | -0.67941 | 4.74329  |
| H  | 2.77446  | 3.85616  | 1.76018  |
| H  | 1.61205  | 2.93665  | 0.78173  |
| H  | 3.33847  | 2.56921  | 0.67774  |
| H  | -1.53273 | -3.81179 | 3.32582  |
| H  | 2.68236  | -1.46005 | -1.89733 |
| H  | 2.73761  | -1.77158 | -3.63271 |
| H  | 1.59006  | -2.64375 | -2.61819 |

|   |          |          |          |
|---|----------|----------|----------|
| H | 2.31543  | 2.47975  | -1.92364 |
| H | 3.31451  | 1.40723  | -2.90369 |
| H | 2.81497  | 0.92138  | -1.27465 |
| H | 2.21011  | -3.89494 | 1.32558  |
| H | 3.52833  | -3.91459 | 0.13809  |
| H | 2.02475  | -3.03802 | -0.21135 |
| H | -4.42803 | 0.66984  | -3.07133 |
| H | -5.50166 | -0.00992 | -1.85064 |
| H | -4.17667 | -0.97818 | -2.48755 |
| H | 4.36434  | -0.62939 | -0.71079 |
| H | 5.59440  | -1.59882 | 0.10715  |
| H | 5.16592  | -0.00557 | 0.73926  |
| H | 4.76892  | -1.37852 | 3.51292  |
| H | 5.10389  | -2.95427 | 2.78508  |
| H | 3.60487  | -2.70611 | 3.69396  |
| H | -2.75353 | 0.13638  | -4.58996 |
| H | -1.64972 | 0.74921  | -5.81439 |
| H | -2.31987 | 1.84719  | -4.61395 |
| H | 4.31647  | 2.43012  | 4.02917  |
| H | 4.78777  | 1.06999  | 3.00609  |
| H | 3.94817  | 0.78089  | 4.54108  |
| H | -2.29427 | -0.47800 | 2.70496  |
| H | -2.98434 | 1.10752  | 3.05463  |
| H | -1.26476 | 0.94316  | 2.68610  |
| H | 0.98414  | -2.16748 | 6.39914  |
| H | -3.40975 | 2.66358  | -2.99703 |
| H | -2.35270 | 3.68561  | -2.02098 |
| H | -4.06861 | 3.58101  | -1.64867 |
| H | -4.07614 | -2.07928 | -0.25420 |
| H | -4.99699 | -1.18907 | 0.96214  |
| H | -3.42358 | -1.87402 | 1.36908  |
| H | -0.39070 | -2.89299 | -3.74874 |
| H | -0.33354 | -2.12067 | -5.33579 |
| H | -1.79528 | -2.02167 | -4.35542 |
| H | 0.10868  | 2.51689  | 3.53570  |
| H | 1.44260  | 3.17902  | 4.48834  |
| H | 0.84746  | 1.54191  | 4.81162  |
| H | -0.80189 | -3.74732 | 5.70037  |

89

Complex 2

|   |          |          |          |
|---|----------|----------|----------|
| C | 1.00507  | -1.56329 | -3.68552 |
| C | 1.88526  | -0.71114 | -2.96390 |
| C | 1.26164  | 0.56254  | -2.83591 |
| C | -0.01786 | 0.49230  | -3.46307 |
| C | -0.16933 | -0.82306 | -3.99501 |
| C | 3.13380  | -1.16111 | -2.27124 |
| C | 1.75545  | 1.71506  | -2.01075 |
| C | -1.09639 | 1.52316  | -3.30263 |
| C | -1.41226 | -1.42921 | -4.57888 |
| C | 1.16909  | -3.04140 | -3.87103 |
| U | 1.80788  | 0.38806  | -5.51442 |
| P | 4.47615  | 1.23147  | -5.07613 |

|    |          |          |          |
|----|----------|----------|----------|
| C  | 5.22624  | 1.75038  | -3.45844 |
| C  | 6.01881  | 0.86508  | -2.68849 |
| C  | 6.55662  | 1.29972  | -1.46976 |
| C  | 6.35280  | 2.58702  | -0.98160 |
| C  | 5.58736  | 3.45908  | -1.75935 |
| C  | 5.02656  | 3.07043  | -2.97743 |
| C  | 6.35094  | -0.53709 | -3.13281 |
| C  | 6.92072  | 3.02508  | 0.34225  |
| C  | 4.23551  | 4.08941  | -3.75535 |
| C  | 2.42521  | -1.68962 | -6.51070 |
| Si | 6.31105  | 1.28747  | -6.44158 |
| C  | 7.82704  | 1.86755  | -5.45347 |
| C  | 6.19834  | 2.53829  | -7.87754 |
| C  | 6.64532  | -0.42660 | -7.19389 |
| C  | 1.78545  | 1.23244  | -8.10833 |
| C  | 1.64829  | 2.43294  | -7.35232 |
| C  | 0.35230  | 2.43406  | -6.76403 |
| C  | -0.31674 | 1.24495  | -7.16545 |
| C  | 0.57525  | 0.49200  | -7.98566 |
| C  | 2.95113  | 0.87637  | -8.98438 |
| C  | 2.58146  | 3.60714  | -7.36004 |
| C  | -0.24792 | 3.60132  | -6.03558 |
| C  | -1.78595 | 0.97061  | -7.03637 |
| C  | 0.19869  | -0.74398 | -8.74961 |
| H  | 2.99928  | -1.47748 | -7.42497 |
| H  | 1.63923  | -2.40917 | -6.77239 |
| H  | 3.11313  | -2.18690 | -5.81112 |
| H  | 2.84556  | 1.74097  | -1.94808 |
| H  | 1.36811  | 1.65345  | -0.98447 |
| H  | 1.42611  | 2.67929  | -2.41230 |
| H  | -1.20498 | 3.34734  | -5.57580 |
| H  | -0.42922 | 4.43574  | -6.72578 |
| H  | 0.40654  | 3.98755  | -5.24525 |
| H  | 7.15992  | 0.60257  | -0.89003 |
| H  | 3.88697  | 0.76189  | -8.42752 |
| H  | 3.12230  | 1.65390  | -9.73890 |
| H  | 2.77542  | -0.06115 | -9.51709 |
| H  | 3.61690  | 3.30748  | -7.51953 |
| H  | 2.54807  | 4.16087  | -6.41826 |
| H  | 2.30303  | 4.30815  | -8.16027 |
| H  | 5.79269  | -0.77749 | -7.78373 |
| H  | 6.83073  | -1.16536 | -6.40907 |
| H  | 7.52134  | -0.39528 | -7.85229 |
| H  | -2.18088 | -0.67989 | -4.77455 |
| H  | -1.84228 | -2.16128 | -3.88306 |
| H  | -1.21959 | -1.96379 | -5.51657 |
| H  | 6.04187  | 3.55353  | -7.49974 |
| H  | 5.41301  | 2.31764  | -8.60368 |
| H  | 7.15488  | 2.52788  | -8.41473 |
| H  | 8.68244  | 1.93233  | -6.13641 |
| H  | 8.09504  | 1.20053  | -4.63286 |
| H  | 7.65346  | 2.86137  | -5.03082 |

|   |          |          |          |
|---|----------|----------|----------|
| H | -2.01150 | -0.09844 | -7.02823 |
| H | -2.32323 | 1.40190  | -7.89205 |
| H | -2.22189 | 1.41057  | -6.13605 |
| H | 2.88362  | -1.64816 | -1.31858 |
| H | 3.80140  | -0.32722 | -2.04906 |
| H | 3.69391  | -1.88617 | -2.86730 |
| H | 5.42518  | 4.47753  | -1.40984 |
| H | -1.87853 | 1.42966  | -4.05912 |
| H | -0.70892 | 2.54468  | -3.34957 |
| H | -1.58343 | 1.41438  | -2.32398 |
| H | 0.65493  | -3.40369 | -4.76534 |
| H | 0.74991  | -3.58394 | -3.01259 |
| H | 2.21898  | -3.33348 | -3.95571 |
| H | 1.07010  | -1.34398 | -9.02027 |
| H | -0.32495 | -0.48362 | -9.67923 |
| H | -0.47181 | -1.39178 | -8.17596 |
| H | 4.23268  | 5.05516  | -3.24060 |
| H | 4.64697  | 4.23015  | -4.76010 |
| H | 3.19648  | 3.77185  | -3.89355 |
| H | 7.32800  | -0.57214 | -3.63016 |
| H | 6.40570  | -1.21637 | -2.27608 |
| H | 5.61339  | -0.91430 | -3.84427 |
| H | 7.35341  | 4.02919  | 0.27978  |
| H | 6.14425  | 3.05725  | 1.11660  |
| H | 7.70162  | 2.34217  | 0.68888  |

105

From 2 N3SiMe3 coordination

|    |          |          |          |
|----|----------|----------|----------|
| C  | 1.03292  | -0.63825 | -3.00028 |
| C  | 1.58505  | 0.55367  | -2.45616 |
| C  | 0.70215  | 1.62766  | -2.76165 |
| C  | -0.38671 | 1.10063  | -3.51440 |
| C  | -0.18350 | -0.30082 | -3.65970 |
| C  | 2.95308  | 0.68743  | -1.85379 |
| U  | -0.69819 | 0.01119  | -0.93959 |
| C  | -1.85103 | -1.96122 | -1.66944 |
| C  | 0.99606  | 3.08448  | -2.55088 |
| C  | -1.36912 | 1.90023  | -4.31892 |
| C  | -0.94785 | -1.19192 | -4.59229 |
| C  | 1.71727  | -1.96975 | -3.07716 |
| N  | 1.07339  | 1.50548  | 0.46258  |
| N  | 1.97164  | 1.87825  | 1.06602  |
| N  | 2.95223  | 2.12089  | 1.73609  |
| P  | 0.85599  | -1.80609 | 0.65461  |
| Si | 2.71339  | -3.12647 | 0.67454  |
| C  | 4.29193  | -2.21152 | 0.12373  |
| Si | 3.65085  | 3.73244  | 2.15769  |
| C  | 4.21098  | 4.57937  | 0.57025  |
| C  | 5.09092  | 3.28775  | 3.27419  |
| C  | 2.33598  | 4.74748  | 3.04627  |
| C  | 0.02993  | -2.46874 | 2.19059  |
| C  | -0.78684 | -3.62263 | 2.16260  |
| C  | -1.38896 | -4.07888 | 3.34456  |

|   |          |          |          |
|---|----------|----------|----------|
| C | -1.20033 | -3.44665 | 4.56864  |
| C | -0.37146 | -2.32136 | 4.59175  |
| C | 0.23833  | -1.82484 | 3.43962  |
| C | -1.02171 | -4.43451 | 0.91463  |
| C | -1.86315 | -3.94564 | 5.82523  |
| C | 1.10570  | -0.60045 | 3.56869  |
| C | 2.53887  | -4.67445 | -0.42308 |
| C | 3.03568  | -3.73749 | 2.44568  |
| C | -2.60771 | 0.46895  | 1.08828  |
| C | -2.00900 | 1.73764  | 0.85054  |
| C | -2.40193 | 2.17817  | -0.44837 |
| C | -3.25163 | 1.17905  | -1.00611 |
| C | -3.38192 | 0.13009  | -0.05506 |
| C | -2.20649 | 3.57539  | -0.96025 |
| C | -1.35357 | 2.59753  | 1.89131  |
| C | -2.65133 | -0.25318 | 2.40166  |
| C | -4.38892 | -0.97680 | -0.12427 |
| C | -4.06606 | 1.26971  | -2.26326 |
| H | -1.13246 | -2.66317 | -2.11285 |
| H | -2.64895 | -1.78987 | -2.40597 |
| H | -2.29945 | -2.47387 | -0.81011 |
| H | -0.77271 | 2.01325  | 2.61013  |
| H | -2.11285 | 3.14800  | 2.46404  |
| H | -0.68569 | 3.34147  | 1.44835  |
| H | 0.10510  | 3.70095  | -2.68779 |
| H | 1.74663  | 3.43842  | -3.27045 |
| H | 1.38739  | 3.29346  | -1.55015 |
| H | 4.94161  | 3.96703  | 0.03387  |
| H | 4.68075  | 5.54107  | 0.80460  |
| H | 3.36858  | 4.77564  | -0.10027 |
| H | -2.01748 | -4.96749 | 3.29744  |
| H | 2.48983  | -2.06752 | -2.31200 |
| H | 2.20408  | -2.10000 | -4.05375 |
| H | 1.01967  | -2.80199 | -2.94786 |
| H | 3.10899  | 0.01966  | -1.00350 |
| H | 3.13873  | 1.70918  | -1.51253 |
| H | 3.72596  | 0.45477  | -2.59802 |
| H | 2.31535  | -4.41601 | -1.46140 |
| H | 1.73623  | -5.32129 | -0.05838 |
| H | 3.47184  | -5.25101 | -0.40727 |
| H | -3.81816 | 2.15549  | -2.85069 |
| H | -5.13538 | 1.32998  | -2.02220 |
| H | -3.93832 | 0.39297  | -2.90901 |
| H | 4.43675  | -1.29159 | 0.69847  |
| H | 4.29568  | -1.95696 | -0.93956 |
| H | 5.15413  | -2.86412 | 0.30698  |
| H | 3.89460  | -4.41929 | 2.43508  |
| H | 2.17459  | -4.27457 | 2.85152  |
| H | 3.26765  | -2.91234 | 3.12522  |
| H | -2.29902 | 1.35583  | -4.49739 |
| H | -0.94357 | 2.13426  | -5.30473 |
| H | -1.62500 | 2.85433  | -3.85164 |

|   |          |          |          |
|---|----------|----------|----------|
| H | 4.74297  | 2.75222  | 4.16218  |
| H | 5.61758  | 4.18959  | 3.60259  |
| H | 5.80513  | 2.64734  | 2.74856  |
| H | -3.56526 | 0.01371  | 2.95055  |
| H | -1.80473 | 0.00172  | 3.04147  |
| H | -2.64682 | -1.34005 | 2.28612  |
| H | -0.19345 | -1.81373 | 5.53883  |
| H | -2.34380 | 3.64689  | -2.04154 |
| H | -1.21425 | 3.97158  | -0.72559 |
| H | -2.93685 | 4.25656  | -0.50188 |
| H | -4.52933 | -1.35140 | -1.14125 |
| H | -5.36522 | -0.61815 | 0.23068  |
| H | -4.11020 | -1.82544 | 0.50579  |
| H | -0.85482 | -2.24574 | -4.32078 |
| H | -0.57116 | -1.08342 | -5.61862 |
| H | -2.01582 | -0.95538 | -4.61408 |
| H | 1.48374  | 4.95989  | 2.39350  |
| H | 2.75735  | 5.70646  | 3.36753  |
| H | 1.96645  | 4.22492  | 3.93325  |
| H | 1.22613  | -0.31695 | 4.61918  |
| H | 2.09544  | -0.75607 | 3.13030  |
| H | 0.67107  | 0.25026  | 3.03269  |
| H | -0.52074 | -5.40781 | 0.98981  |
| H | -2.08855 | -4.63836 | 0.77067  |
| H | -0.63917 | -3.92328 | 0.03004  |
| H | -1.14261 | -4.04730 | 6.64439  |
| H | -2.64163 | -3.25289 | 6.16761  |
| H | -2.33422 | -4.92035 | 5.66926  |

105

From 2 - N-P coupling TS

|    |          |          |          |
|----|----------|----------|----------|
| C  | 0.45786  | -0.94700 | -3.38571 |
| C  | 0.91489  | 0.33562  | -2.97580 |
| C  | -0.06445 | 1.29465  | -3.35158 |
| C  | -1.12352 | 0.60556  | -4.01322 |
| C  | -0.79954 | -0.78401 | -4.02849 |
| C  | 2.27723  | 0.65143  | -2.43764 |
| U  | -1.28642 | -0.19937 | -1.34637 |
| C  | -2.03124 | -2.49091 | -1.63355 |
| C  | 0.10257  | 2.78271  | -3.24884 |
| C  | -2.17165 | 1.24834  | -4.87376 |
| C  | -1.53506 | -1.84195 | -4.79601 |
| C  | 1.25944  | -2.21251 | -3.33266 |
| N  | 0.15885  | 1.15936  | -0.11724 |
| N  | 1.18160  | 1.34413  | 0.48226  |
| N  | 1.95322  | 0.57523  | 1.13267  |
| P  | 0.75783  | -1.57900 | 0.61946  |
| Si | 2.73937  | -2.77135 | 0.64596  |
| C  | 4.15558  | -1.79862 | -0.16763 |
| Si | 3.27981  | 1.51739  | 1.97421  |
| C  | 4.37578  | 2.33722  | 0.67130  |
| C  | 4.30536  | 0.34294  | 3.03174  |
| C  | 2.49393  | 2.83987  | 3.07048  |



|   |          |          |          |
|---|----------|----------|----------|
| C | -0.08005 | -2.34429 | 2.11613  |
| C | -0.64376 | -3.63852 | 1.99539  |
| C | -1.30643 | -4.21904 | 3.08535  |
| C | -1.44028 | -3.57504 | 4.30867  |
| C | -0.87955 | -2.30181 | 4.41937  |
| C | -0.21254 | -1.67888 | 3.36329  |
| C | -0.56681 | -4.47941 | 0.74716  |
| C | -2.17004 | -4.20731 | 5.46312  |
| C | 0.34489  | -0.30746 | 3.62502  |
| C | 2.65400  | -4.40318 | -0.33377 |
| C | 3.17961  | -3.22861 | 2.43398  |
| C | -3.29421 | 0.03587  | 0.57680  |
| C | -2.82719 | 1.35922  | 0.34198  |
| C | -3.21864 | 1.73548  | -0.97721 |
| C | -3.95191 | 0.65123  | -1.54303 |
| C | -3.99654 | -0.39636 | -0.58278 |
| C | -3.08701 | 3.12333  | -1.53259 |
| C | -2.24649 | 2.29045  | 1.36442  |
| C | -3.26430 | -0.70301 | 1.88176  |
| C | -4.87887 | -1.60399 | -0.66496 |
| C | -4.77210 | 0.66596  | -2.79979 |
| H | -1.22470 | -3.14241 | -1.99502 |
| H | -2.84110 | -2.53834 | -2.37600 |
| H | -2.41733 | -2.93774 | -0.70937 |
| H | -1.70823 | 1.75291  | 2.14884  |
| H | -3.04309 | 2.86789  | 1.85362  |
| H | -1.54696 | 3.00192  | 0.91899  |
| H | -0.83385 | 3.30957  | -3.44483 |
| H | 0.83601  | 3.14541  | -3.98147 |
| H | 0.45245  | 3.08744  | -2.25754 |
| H | 4.83317  | 1.60270  | 0.00219  |
| H | 5.18024  | 2.90091  | 1.15715  |
| H | 3.79240  | 3.03452  | 0.06288  |
| H | -1.72983 | -5.21444 | 2.95780  |
| H | 1.98581  | -2.19084 | -2.51690 |
| H | 1.82206  | -2.35776 | -4.26523 |
| H | 0.63078  | -3.09678 | -3.19489 |
| H | 2.58788  | -0.03402 | -1.64576 |
| H | 2.31807  | 1.66225  | -2.02600 |
| H | 3.03041  | 0.59230  | -3.23530 |
| H | 2.17269  | -4.28402 | -1.30776 |
| H | 2.13099  | -5.18957 | 0.21350  |
| H | 3.68224  | -4.74348 | -0.50698 |
| H | -4.56008 | 1.53844  | -3.41961 |
| H | -5.84185 | 0.69722  | -2.55352 |
| H | -4.61739 | -0.22726 | -3.41544 |
| H | 4.20882  | -0.76118 | 0.16381  |
| H | 4.06023  | -1.80201 | -1.25747 |
| H | 5.10401  | -2.29094 | 0.07862  |
| H | 4.10953  | -3.80929 | 2.44581  |
| H | 2.38804  | -3.84156 | 2.87392  |
| H | 3.31594  | -2.35136 | 3.06919  |

|   |          |          |          |
|---|----------|----------|----------|
| H | -3.03186 | 0.59619  | -5.03842 |
| H | -1.75212 | 1.47931  | -5.86274 |
| H | -2.54166 | 2.19018  | -4.46056 |
| H | 3.71983  | -0.12070 | 3.83032  |
| H | 5.10110  | 0.92810  | 3.50702  |
| H | 4.78051  | -0.44710 | 2.44610  |
| H | -4.23949 | -0.63551 | 2.38295  |
| H | -2.52113 | -0.29286 | 2.56790  |
| H | -3.03717 | -1.76647 | 1.76007  |
| H | -0.96471 | -1.76652 | 5.36365  |
| H | -3.22006 | 3.14997  | -2.61698 |
| H | -2.11224 | 3.56529  | -1.30631 |
| H | -3.84813 | 3.78742  | -1.10050 |
| H | -4.97249 | -1.98335 | -1.68616 |
| H | -5.89130 | -1.35582 | -0.31666 |
| H | -4.51496 | -2.42466 | -0.04191 |
| H | -1.37354 | -2.83800 | -4.37655 |
| H | -1.19860 | -1.86754 | -5.84163 |
| H | -2.61535 | -1.66707 | -4.81154 |
| H | 1.89410  | 3.53358  | 2.47413  |
| H | 3.27154  | 3.41719  | 3.58305  |
| H | 1.84543  | 2.39532  | 3.83070  |
| H | 0.01477  | 0.05992  | 4.60118  |
| H | 1.43835  | -0.31911 | 3.62090  |
| H | 0.03998  | 0.41253  | 2.86276  |
| H | 0.06606  | -5.35790 | 0.91479  |
| H | -1.55802 | -4.84995 | 0.46828  |
| H | -0.16778 | -3.92630 | -0.10338 |
| H | -1.57895 | -4.15895 | 6.38417  |
| H | -3.11801 | -3.69343 | 5.66280  |
| H | -2.39891 | -5.25805 | 5.26461  |

105

From 2 - N-P coupling product

|    |          |          |          |
|----|----------|----------|----------|
| C  | 0.51184  | -0.22020 | -3.28472 |
| C  | 0.89860  | 1.11316  | -2.96520 |
| C  | -0.13073 | 1.99000  | -3.40886 |
| C  | -1.15972 | 1.20092  | -3.99579 |
| C  | -0.76100 | -0.16857 | -3.92033 |
| C  | 2.22725  | 1.54212  | -2.42045 |
| U  | -1.22590 | 0.52647  | -1.30542 |
| C  | -2.02658 | -1.75946 | -1.31257 |
| C  | -0.03378 | 3.48752  | -3.39079 |
| C  | -2.35350 | 1.69231  | -4.76179 |
| C  | -1.48323 | -1.30419 | -4.58411 |
| C  | 1.36370  | -1.43924 | -3.08309 |
| N  | 0.48499  | 0.40110  | 0.11573  |
| N  | 1.32668  | 1.02313  | 0.77228  |
| N  | 2.23798  | 0.32273  | 1.54854  |
| P  | 2.28494  | -1.44321 | 1.24197  |
| Si | 4.09514  | -2.44783 | 2.25403  |
| C  | 5.71643  | -1.78596 | 1.51335  |
| Si | 3.44888  | 1.57136  | 2.11860  |

|   |          |          |          |
|---|----------|----------|----------|
| C | 4.67839  | 1.91822  | 0.72743  |
| C | 4.38571  | 1.04534  | 3.67103  |
| C | 2.51414  | 3.15116  | 2.55752  |
| C | 0.91244  | -2.21782 | 2.22651  |
| C | 0.22692  | -3.28437 | 1.59103  |
| C | -0.80562 | -3.94100 | 2.26689  |
| C | -1.20107 | -3.57833 | 3.55354  |
| C | -0.53121 | -2.51583 | 4.15887  |
| C | 0.51299  | -1.83178 | 3.52825  |
| C | 0.56307  | -3.74425 | 0.19561  |
| C | -2.29346 | -4.32376 | 4.27281  |
| C | 1.14805  | -0.68994 | 4.27287  |
| C | 3.91478  | -4.23345 | 1.62504  |
| C | 4.19614  | -2.59697 | 4.14698  |
| C | -2.48228 | 1.34662  | 1.00293  |
| C | -2.20010 | 2.53472  | 0.27413  |
| C | -3.03933 | 2.55630  | -0.88073 |
| C | -3.82579 | 1.36496  | -0.86551 |
| C | -3.49091 | 0.62583  | 0.30294  |
| C | -3.27459 | 3.74640  | -1.76523 |
| C | -1.25134 | 3.61655  | 0.70253  |
| C | -1.92432 | 0.98017  | 2.34640  |
| C | -4.20972 | -0.58797 | 0.81016  |
| C | -4.93113 | 1.01515  | -1.81995 |
| H | -1.34255 | -2.43322 | -1.84526 |
| H | -3.00613 | -1.84701 | -1.80836 |
| H | -2.14264 | -2.16066 | -0.29676 |
| H | -0.33163 | 3.20218  | 1.12706  |
| H | -1.70285 | 4.26650  | 1.46392  |
| H | -0.96507 | 4.26031  | -0.13520 |
| H | -0.97470 | 3.96258  | -3.67624 |
| H | 0.73137  | 3.83425  | -4.09784 |
| H | 0.25092  | 3.87838  | -2.40675 |
| H | 5.21648  | 1.01655  | 0.42203  |
| H | 5.41694  | 2.66167  | 1.04777  |
| H | 4.15709  | 2.31318  | -0.14903 |
| H | -1.31916 | -4.75778 | 1.76301  |
| H | 1.85735  | -1.43575 | -2.10555 |
| H | 2.14901  | -1.49940 | -3.84845 |
| H | 0.77606  | -2.35854 | -3.15239 |
| H | 2.70776  | 0.74046  | -1.85420 |
| H | 2.13574  | 2.40452  | -1.75246 |
| H | 2.90951  | 1.82938  | -3.23259 |
| H | 3.92933  | -4.28739 | 0.53286  |
| H | 2.99445  | -4.70031 | 1.98727  |
| H | 4.75881  | -4.82279 | 2.00255  |
| H | -4.83934 | 1.55127  | -2.76864 |
| H | -5.91246 | 1.27449  | -1.40043 |
| H | -4.95662 | -0.05670 | -2.04467 |
| H | 5.99204  | -0.78739 | 1.85918  |
| H | 5.64672  | -1.76199 | 0.42110  |
| H | 6.53233  | -2.46784 | 1.77930  |

|   |          |          |          |
|---|----------|----------|----------|
| H | 4.98652  | -3.31680 | 4.39154  |
| H | 3.25400  | -2.99185 | 4.53938  |
| H | 4.42098  | -1.66369 | 4.66633  |
| H | -3.26381 | 1.13137  | -4.52376 |
| H | -2.19206 | 1.58485  | -5.84279 |
| H | -2.55667 | 2.74888  | -4.57243 |
| H | 3.71901  | 0.91345  | 4.52714  |
| H | 5.07087  | 1.86703  | 3.91297  |
| H | 4.98942  | 0.14525  | 3.55387  |
| H | -2.62869 | 1.24952  | 3.14505  |
| H | -0.98768 | 1.50644  | 2.54470  |
| H | -1.72331 | -0.09132 | 2.43784  |
| H | -0.82549 | -2.20404 | 5.15959  |
| H | -3.61445 | 3.46407  | -2.76499 |
| H | -2.38085 | 4.36491  | -1.87976 |
| H | -4.05316 | 4.39157  | -1.33549 |
| H | -4.56383 | -1.22851 | -0.00220 |
| H | -5.08783 | -0.29515 | 1.40202  |
| H | -3.57369 | -1.19930 | 1.45631  |
| H | -1.20456 | -2.27190 | -4.16090 |
| H | -1.25356 | -1.33831 | -5.65784 |
| H | -2.57036 | -1.21243 | -4.49264 |
| H | 2.10017  | 3.62986  | 1.66832  |
| H | 3.19972  | 3.85358  | 3.04582  |
| H | 1.69257  | 2.94591  | 3.25024  |
| H | 0.84727  | -0.69977 | 5.32453  |
| H | 2.23776  | -0.73838 | 4.22894  |
| H | 0.85622  | 0.27334  | 3.84365  |
| H | 1.51247  | -4.28797 | 0.15776  |
| H | -0.21675 | -4.40923 | -0.18516 |
| H | 0.65394  | -2.89305 | -0.48343 |
| H | -1.88825 | -5.18157 | 4.82425  |
| H | -2.80592 | -3.68442 | 4.99778  |
| H | -3.04040 | -4.71193 | 3.57377  |

105

From 2 - N-N activation TS

|    |          |          |          |
|----|----------|----------|----------|
| C  | -2.81673 | 3.31785  | 15.14310 |
| C  | -2.22285 | 2.50200  | 14.14315 |
| C  | -2.74242 | 1.19466  | 13.97882 |
| C  | -3.75740 | 0.71567  | 14.81286 |
| C  | -4.31678 | 1.49474  | 15.82017 |
| C  | -3.83750 | 2.79644  | 15.94682 |
| P  | -0.84696 | 3.10618  | 12.98156 |
| Si | 0.84407  | 1.48804  | 13.24430 |
| C  | 0.86527  | -0.01154 | 12.05313 |
| C  | -2.25332 | 0.24715  | 12.91677 |
| C  | -5.38609 | 0.95805  | 16.73296 |
| C  | -2.42564 | 4.74462  | 15.43107 |
| N  | -0.14460 | 4.44769  | 13.49644 |
| Si | 0.88115  | 5.52611  | 14.35073 |
| C  | 1.63643  | 4.76182  | 15.92981 |
| C  | 0.80939  | 0.87444  | 15.04086 |

|   |          |          |          |
|---|----------|----------|----------|
| C | 2.48919  | 2.37469  | 12.93381 |
| C | 0.00233  | 7.12029  | 14.91669 |
| C | 2.31259  | 6.15454  | 13.26182 |
| N | -1.19632 | 6.10476  | 11.89956 |
| N | -1.68356 | 5.37681  | 11.19763 |
| U | -2.40307 | 3.64034  | 9.65690  |
| C | -2.48666 | 1.22996  | 9.47503  |
| C | -1.05598 | 3.37624  | 7.31133  |
| C | -0.06715 | 3.14663  | 8.31168  |
| C | 0.19298  | 4.38334  | 8.97088  |
| C | -0.63491 | 5.37799  | 8.37599  |
| C | -1.40258 | 4.76123  | 7.34650  |
| C | 0.71761  | 1.88425  | 8.51583  |
| C | -1.51280 | 2.39797  | 6.26770  |
| C | -2.12144 | 5.50310  | 6.25904  |
| C | -0.54255 | 6.85741  | 8.61111  |
| C | 1.28173  | 4.62789  | 9.97721  |
| C | -5.06775 | 3.12795  | 9.28058  |
| C | -4.85453 | 4.38325  | 8.63455  |
| C | -4.57331 | 5.35166  | 9.64090  |
| C | -4.63146 | 4.70011  | 10.90962 |
| C | -4.93492 | 3.32752  | 10.68320 |
| C | -5.20571 | 4.65457  | 7.20109  |
| C | -5.58380 | 1.89204  | 8.60530  |
| C | -5.25389 | 2.32209  | 11.74761 |
| C | -4.61737 | 5.37147  | 12.25116 |
| C | -4.42266 | 6.83062  | 9.43412  |
| H | -1.52120 | 0.74786  | 9.67935  |
| H | -2.77094 | 0.94627  | 8.45052  |
| H | -3.22444 | 0.77161  | 10.14473 |
| H | -4.07004 | 6.31686  | 12.23560 |
| H | -4.17254 | 4.73885  | 13.02347 |
| H | -5.64344 | 5.59786  | 12.57015 |
| H | -1.50953 | 7.35725  | 8.50096  |
| H | 0.13859  | 7.31680  | 7.88220  |
| H | -0.15993 | 7.09360  | 9.60624  |
| H | 2.92084  | 5.34762  | 12.84423 |
| H | 2.97276  | 6.80613  | 13.84648 |
| H | 1.92173  | 6.74577  | 12.42689 |
| H | -4.12477 | -0.29731 | 14.65269 |
| H | 0.93832  | 1.69827  | 9.57037  |
| H | 1.68056  | 1.94550  | 7.99136  |
| H | 0.19331  | 1.00779  | 8.12816  |
| H | 2.10246  | 3.92043  | 9.82407  |
| H | 0.96024  | 4.54045  | 11.02173 |
| H | 1.69941  | 5.63187  | 9.85568  |
| H | 0.56130  | -0.93216 | 12.55925 |
| H | 1.88945  | -0.15479 | 11.69170 |
| H | 0.22039  | 0.11330  | 11.17984 |
| H | -4.84544 | 5.62631  | 6.86062  |
| H | -6.29736 | 4.65509  | 7.08109  |
| H | -4.81634 | 3.89418  | 6.51650  |

|   |          |          |          |
|---|----------|----------|----------|
| H | 2.56099  | 2.74076  | 11.90617 |
| H | 3.30317  | 1.65696  | 13.09235 |
| H | 2.63991  | 3.21825  | 13.60675 |
| H | 0.88532  | 1.71954  | 15.73043 |
| H | 1.65804  | 0.20499  | 15.22399 |
| H | -0.11184 | 0.33387  | 15.27422 |
| H | -2.84364 | 4.87697  | 5.73178  |
| H | -1.39781 | 5.85623  | 5.51156  |
| H | -2.64703 | 6.38724  | 6.62993  |
| H | 2.31742  | 3.93200  | 15.71729 |
| H | 0.85498  | 4.38709  | 16.59971 |
| H | 2.20434  | 5.52350  | 16.47735 |
| H | -5.02145 | 1.30100  | 11.43359 |
| H | -6.32617 | 2.34885  | 11.98352 |
| H | -4.71420 | 2.51352  | 12.67733 |
| H | -4.27330 | 3.44679  | 16.70388 |
| H | -5.38165 | 7.34405  | 9.58357  |
| H | -4.08644 | 7.07129  | 8.42182  |
| H | -3.71011 | 7.27496  | 10.13535 |
| H | -5.16998 | 1.76490  | 7.60006  |
| H | -6.67591 | 1.94080  | 8.49874  |
| H | -5.35226 | 0.98726  | 9.17163  |
| H | -2.57618 | 2.50900  | 6.02897  |
| H | -1.35381 | 1.36375  | 6.58183  |
| H | -0.95992 | 2.54282  | 5.33022  |
| H | 0.75695  | 7.83037  | 15.27598 |
| H | -0.70840 | 6.95744  | 15.73116 |
| H | -0.53143 | 7.59333  | 14.08773 |
| H | -3.22135 | 5.24203  | 15.99476 |
| H | -1.51723 | 4.78399  | 16.03981 |
| H | -2.21460 | 5.31634  | 14.52953 |
| H | -1.85862 | 0.76213  | 12.04003 |
| H | -1.46652 | -0.41008 | 13.30039 |
| H | -3.06702 | -0.40177 | 12.57810 |
| H | -5.96157 | 0.16110  | 16.25213 |
| H | -4.94980 | 0.53788  | 17.64788 |
| H | -6.08368 | 1.74375  | 17.03935 |

105

From 2 - N-N activation product

|   |          |         |          |
|---|----------|---------|----------|
| C | -5.18126 | 3.43183 | 10.27511 |
| C | -5.30083 | 3.41518 | 8.85700  |
| C | -4.95139 | 4.71016 | 8.36979  |
| C | -4.60208 | 5.51995 | 9.48872  |
| C | -4.75438 | 4.73166 | 10.66888 |
| C | -5.92707 | 2.33045 | 8.03233  |
| C | -5.24318 | 5.18227 | 6.97579  |
| C | -4.31327 | 6.99252 | 9.46225  |
| C | -4.71104 | 5.23272 | 12.08236 |
| C | -5.61834 | 2.34368 | 11.20831 |
| U | -2.60307 | 3.62124 | 9.33412  |
| C | -2.93370 | 1.29353 | 8.77129  |
| N | -1.77508 | 5.09606 | 11.10666 |

|    |          |          |          |
|----|----------|----------|----------|
| N  | -1.22775 | 5.65683  | 11.90823 |
| N  | -0.34072 | 3.64063  | 13.20285 |
| Si | 0.77067  | 4.41528  | 14.25634 |
| C  | 2.32938  | 5.01153  | 13.33560 |
| P  | -1.19204 | 2.48647  | 12.49180 |
| Si | 0.29447  | 0.65573  | 12.51109 |
| C  | 2.03407  | 1.38748  | 12.34579 |
| C  | -2.64631 | 1.87635  | 13.55623 |
| C  | -3.17813 | 2.61925  | 14.64315 |
| C  | -4.25880 | 2.10695  | 15.37180 |
| C  | -4.85571 | 0.88172  | 15.08776 |
| C  | -4.35573 | 0.17910  | 13.99575 |
| C  | -3.28728 | 0.65518  | 13.23031 |
| C  | -2.65863 | 3.95571  | 15.10828 |
| C  | -2.87760 | -0.19571 | 12.05883 |
| C  | -5.98553 | 0.34303  | 15.92312 |
| C  | 0.17856  | -0.65347 | 11.11469 |
| C  | 0.15427  | -0.19917 | 14.20106 |
| C  | 1.33697  | 3.31513  | 15.71133 |
| C  | 0.08468  | 6.01075  | 15.04484 |
| C  | -1.17785 | 3.50112  | 7.02160  |
| C  | -0.24693 | 3.12566  | 8.03235  |
| C  | 0.05311  | 4.27885  | 8.81343  |
| C  | -0.69660 | 5.36906  | 8.28678  |
| C  | -1.45359 | 4.89401  | 7.17694  |
| C  | -1.62826 | 2.65637  | 5.86508  |
| C  | 0.46009  | 1.80893  | 8.15793  |
| C  | 1.11768  | 4.35982  | 9.87024  |
| C  | -0.54327 | 6.81303  | 8.66693  |
| C  | -2.07679 | 5.77359  | 6.13397  |
| H  | -2.01574 | 0.70203  | 8.89251  |
| H  | -3.23379 | 1.20057  | 7.71729  |
| H  | -3.71486 | 0.80368  | 9.36515  |
| H  | -4.09914 | 6.13201  | 12.18420 |
| H  | -4.32178 | 4.48078  | 12.77356 |
| H  | -5.72312 | 5.49041  | 12.42144 |
| H  | -1.48069 | 7.36886  | 8.57335  |
| H  | 0.18641  | 7.30494  | 8.00990  |
| H  | -0.18941 | 6.93493  | 9.69287  |
| H  | 2.85310  | 4.21223  | 12.80454 |
| H  | 3.03287  | 5.45943  | 14.04750 |
| H  | 2.06598  | 5.78320  | 12.60445 |
| H  | -4.81536 | -0.76690 | 13.71217 |
| H  | 0.59975  | 1.51324  | 9.20125  |
| H  | 1.45910  | 1.86960  | 7.70563  |
| H  | -0.07522 | 1.00238  | 7.65176  |
| H  | 1.98596  | 3.76086  | 9.57454  |
| H  | 0.79941  | 4.01534  | 10.86143 |
| H  | 1.46665  | 5.38894  | 9.98984  |
| H  | -0.16799 | -1.61595 | 11.50280 |
| H  | 1.17803  | -0.80738 | 10.69378 |
| H  | -0.48600 | -0.37018 | 10.29551 |

|   |          |          |          |
|---|----------|----------|----------|
| H | -4.77748 | 6.14349  | 6.75340  |
| H | -6.32632 | 5.31250  | 6.84887  |
| H | -4.92244 | 4.46854  | 6.21035  |
| H | 2.16406  | 1.91729  | 11.39790 |
| H | 2.75972  | 0.56567  | 12.37435 |
| H | 2.26583  | 2.07829  | 13.15579 |
| H | 0.29948  | 0.52841  | 15.00392 |
| H | 0.92584  | -0.97236 | 14.29443 |
| H | -0.82262 | -0.66737 | 14.34814 |
| H | -2.83486 | 5.25577  | 5.54327  |
| H | -1.30405 | 6.11668  | 5.43226  |
| H | -2.53452 | 6.67055  | 6.55954  |
| H | 1.92268  | 2.44938  | 15.38646 |
| H | 0.47830  | 2.94145  | 16.27955 |
| H | 1.96155  | 3.89705  | 16.39959 |
| H | -5.48492 | 1.34870  | 10.77533 |
| H | -6.68648 | 2.45135  | 11.44022 |
| H | -5.07814 | 2.36612  | 12.15721 |
| H | -4.64435 | 2.70213  | 16.19836 |
| H | -5.22295 | 7.57079  | 9.67129  |
| H | -3.94426 | 7.32008  | 8.48630  |
| H | -3.57158 | 7.28218  | 10.21254 |
| H | -5.49711 | 2.27071  | 7.02771  |
| H | -7.00271 | 2.51636  | 7.91055  |
| H | -5.81740 | 1.34725  | 8.49481  |
| H | -2.66941 | 2.85114  | 5.58598  |
| H | -1.54157 | 1.58935  | 6.08252  |
| H | -1.01685 | 2.85996  | 4.97607  |
| H | 0.91006  | 6.54664  | 15.52902 |
| H | -0.67867 | 5.82831  | 15.80568 |
| H | -0.34217 | 6.67348  | 14.28681 |
| H | -3.43712 | 4.48324  | 15.66882 |
| H | -1.80458 | 3.82478  | 15.78011 |
| H | -2.31223 | 4.58614  | 14.29245 |
| H | -2.46941 | 0.39081  | 11.23480 |
| H | -2.12386 | -0.93624 | 12.34421 |
| H | -3.73572 | -0.75354 | 11.67147 |
| H | -6.64396 | -0.30612 | 15.33764 |
| H | -5.60606 | -0.25196 | 16.76336 |
| H | -6.59186 | 1.14989  | 16.34614 |

103

From 2 - SiMe3 trans. adduct

|   |          |          |          |
|---|----------|----------|----------|
| C | 0.04278  | 0.01910  | -3.77253 |
| C | 1.28062  | -0.10933 | -3.08420 |
| C | 1.67426  | 1.18228  | -2.63282 |
| C | 0.67520  | 2.11211  | -3.04092 |
| C | -0.32876 | 1.39079  | -3.74633 |
| C | 2.14551  | -1.33299 | -3.03177 |
| C | 3.03337  | 1.49623  | -2.08169 |
| C | 0.79488  | 3.61010  | -3.04948 |
| C | -1.35431 | 2.01868  | -4.64296 |
| C | -0.61572 | -1.03153 | -4.61671 |



|    |          |          |          |
|----|----------|----------|----------|
| U  | -0.48150 | 0.43301  | -0.99728 |
| C  | -0.87973 | -1.88982 | -1.46692 |
| N  | 0.94854  | 0.21772  | 0.80058  |
| Si | 1.44349  | 1.83697  | 1.44953  |
| C  | 3.30970  | 2.19243  | 1.52605  |
| P  | 1.96920  | -0.82321 | 1.81458  |
| C  | 1.06292  | -1.50954 | 3.29242  |
| C  | -0.12411 | -2.27802 | 3.23578  |
| C  | -0.72670 | -2.73441 | 4.40843  |
| C  | -0.18529 | -2.47052 | 5.66745  |
| C  | 1.00110  | -1.74460 | 5.71719  |
| C  | 1.63873  | -1.26349 | 4.56652  |
| C  | -0.74837 | -2.63485 | 1.92331  |
| C  | -0.86949 | -2.94214 | 6.92228  |
| C  | 2.95011  | -0.54421 | 4.77387  |
| Si | 2.99577  | -2.67411 | 0.92373  |
| C  | 2.12291  | -4.01090 | -0.11176 |
| C  | 3.66163  | -3.53387 | 2.48280  |
| C  | 4.50906  | -2.02315 | -0.02650 |
| C  | 0.75668  | 2.15704  | 3.18876  |
| C  | 0.77692  | 3.22573  | 0.30866  |
| C  | -3.16433 | -0.18662 | -0.29542 |
| C  | -2.68564 | 0.62248  | 0.76946  |
| C  | -2.49721 | 1.94250  | 0.26387  |
| C  | -2.86615 | 1.95048  | -1.11150 |
| C  | -3.26238 | 0.62910  | -1.46096 |
| C  | -3.08378 | 3.20216  | -1.91134 |
| C  | -2.36406 | 3.17174  | 1.11627  |
| C  | -2.64216 | 0.25921  | 2.22715  |
| C  | -3.75682 | -1.55885 | -0.18002 |
| C  | -3.91486 | 0.17953  | -2.73581 |
| H  | 0.04511  | -2.37177 | -1.80880 |
| H  | -1.61002 | -2.00757 | -2.27892 |
| H  | -1.25704 | -2.47283 | -0.62220 |
| H  | -1.64407 | 3.05317  | 1.92830  |
| H  | -3.33266 | 3.41007  | 1.57847  |
| H  | -2.06520 | 4.04760  | 0.53468  |
| H  | -0.07984 | 4.12161  | -2.63356 |
| H  | 0.91261  | 3.97258  | -4.07915 |
| H  | 1.66890  | 3.95397  | -2.49233 |
| H  | 0.51637  | 4.07537  | 0.94940  |
| H  | -0.11623 | 3.03705  | -0.29886 |
| H  | 1.56847  | 3.55396  | -0.36627 |
| H  | -1.63941 | -3.32325 | 4.33317  |
| H  | 2.42903  | -1.60918 | -2.01236 |
| H  | 3.07707  | -1.17416 | -3.59088 |
| H  | 1.64607  | -2.19733 | -3.47581 |
| H  | 3.07841  | 2.48122  | -1.61176 |
| H  | 3.78337  | 1.49026  | -2.88502 |
| H  | 3.35401  | 0.76311  | -1.33651 |
| H  | 1.43791  | -4.60137 | 0.50359  |
| H  | 2.88729  | -4.69290 | -0.50396 |

|   |          |          |          |
|---|----------|----------|----------|
| H | 1.56125  | -3.61159 | -0.95795 |
| H | -3.92297 | 0.96756  | -3.49137 |
| H | -4.96085 | -0.09912 | -2.55295 |
| H | -3.42881 | -0.69880 | -3.17557 |
| H | 4.25568  | -1.46674 | -0.93145 |
| H | 5.14532  | -2.86563 | -0.32149 |
| H | 5.09583  | -1.36474 | 0.62103  |
| H | 4.29875  | -2.86684 | 3.06952  |
| H | 4.26942  | -4.39381 | 2.17760  |
| H | 2.85530  | -3.89529 | 3.12630  |
| H | -2.25203 | 1.40652  | -4.75743 |
| H | -0.93433 | 2.15027  | -5.65057 |
| H | -1.65925 | 3.00793  | -4.29631 |
| H | 3.45783  | 3.27976  | 1.54685  |
| H | 3.84307  | 1.79673  | 0.65887  |
| H | 3.76823  | 1.76922  | 2.42188  |
| H | -3.05415 | -0.73731 | 2.40261  |
| H | -3.24777 | 0.96396  | 2.81089  |
| H | -1.63324 | 0.27058  | 2.64982  |
| H | 1.45699  | -1.54229 | 6.68495  |
| H | -3.38543 | 2.98243  | -2.93630 |
| H | -2.19733 | 3.84440  | -1.96040 |
| H | -3.88502 | 3.80392  | -1.46248 |
| H | -3.62312 | -2.14322 | -1.09392 |
| H | -4.83732 | -1.48718 | 0.00567  |
| H | -3.32535 | -2.13429 | 0.64194  |
| H | -0.42051 | -2.04215 | -4.25056 |
| H | -0.24776 | -0.98014 | -5.65052 |
| H | -1.70161 | -0.90388 | -4.66001 |
| H | -0.33327 | 2.09039  | 3.22901  |
| H | 1.04744  | 3.16358  | 3.51283  |
| H | 1.15150  | 1.44305  | 3.91460  |
| H | 3.79036  | -1.24803 | 4.73424  |
| H | 3.13590  | 0.20490  | 4.00288  |
| H | 2.97623  | -0.06687 | 5.75838  |
| H | -1.59905 | -3.30969 | 2.05562  |
| H | -1.09773 | -1.74221 | 1.40064  |
| H | -0.03015 | -3.11818 | 1.25686  |
| H | -0.16832 | -3.01641 | 7.75852  |
| H | -1.66427 | -2.24770 | 7.22190  |
| H | -1.33484 | -3.92271 | 6.78037  |

103

From 2 - SiMe3 trans. TS

|   |          |          |          |
|---|----------|----------|----------|
| C | 0.42787  | -0.45599 | -3.37524 |
| C | 1.66193  | -0.56795 | -2.67740 |
| C | 2.05417  | 0.73513  | -2.26026 |
| C | 1.04985  | 1.65304  | -2.68208 |
| C | 0.05385  | 0.91565  | -3.38335 |
| C | 2.53447  | -1.78645 | -2.62299 |
| C | 3.42243  | 1.08028  | -1.74308 |
| C | 1.15401  | 3.15180  | -2.66208 |
| C | -0.99660 | 1.50675  | -4.27673 |

|    |          |          |          |
|----|----------|----------|----------|
| C  | -0.22709 | -1.53447 | -4.18675 |
| U  | -0.14545 | 0.03551  | -0.61215 |
| C  | -0.69201 | -2.28677 | -1.04247 |
| N  | 1.12265  | -0.36418 | 1.10774  |
| Si | 2.26252  | 1.31165  | 2.23351  |
| C  | 4.12686  | 1.72784  | 2.39403  |
| P  | 2.16459  | -0.99948 | 2.26928  |
| C  | 1.41103  | -1.81911 | 3.76519  |
| C  | 0.27717  | -2.66183 | 3.67250  |
| C  | -0.29593 | -3.18065 | 4.83401  |
| C  | 0.23076  | -2.92613 | 6.10108  |
| C  | 1.38121  | -2.14555 | 6.17357  |
| C  | 1.98485  | -1.59281 | 5.03879  |
| C  | -0.29761 | -3.05970 | 2.34647  |
| C  | -0.42787 | -3.46910 | 7.34041  |
| C  | 3.26652  | -0.82844 | 5.26421  |
| Si | 3.70982  | -2.59128 | 1.56592  |
| C  | 2.85717  | -3.92442 | 0.52558  |
| C  | 4.49168  | -3.38200 | 3.10093  |
| C  | 5.08877  | -1.73252 | 0.59132  |
| C  | 1.36169  | 1.76269  | 3.84461  |
| C  | 1.72993  | 2.57607  | 0.91962  |
| C  | -2.84895 | -0.35207 | 0.12097  |
| C  | -2.26652 | 0.34865  | 1.20920  |
| C  | -1.96368 | 1.67047  | 0.76917  |
| C  | -2.37375 | 1.79076  | -0.58990 |
| C  | -2.90800 | 0.53571  | -0.99393 |
| C  | -2.47493 | 3.09690  | -1.32214 |
| C  | -1.65441 | 2.82424  | 1.68067  |
| C  | -2.19208 | -0.11380 | 2.63468  |
| C  | -3.54240 | -1.67971 | 0.18482  |
| C  | -3.62336 | 0.21956  | -2.27474 |
| H  | 0.21768  | -2.83298 | -1.33334 |
| H  | -1.39404 | -2.38453 | -1.88252 |
| H  | -1.13705 | -2.82907 | -0.20232 |
| H  | -0.97311 | 2.55078  | 2.48966  |
| H  | -2.57792 | 3.19131  | 2.15158  |
| H  | -1.21523 | 3.67264  | 1.14742  |
| H  | 0.17266  | 3.62767  | -2.74051 |
| H  | 1.74919  | 3.51382  | -3.51223 |
| H  | 1.62806  | 3.53396  | -1.75384 |
| H  | 1.92910  | 3.58263  | 1.31101  |
| H  | 0.66493  | 2.52560  | 0.67819  |
| H  | 2.31031  | 2.45402  | 0.00628  |
| H  | -1.17562 | -3.81493 | 4.73917  |
| H  | 3.06620  | -1.87826 | -1.67260 |
| H  | 3.29724  | -1.75598 | -3.41435 |
| H  | 1.96192  | -2.70632 | -2.76767 |
| H  | 3.57279  | 2.16261  | -1.69389 |
| H  | 4.19395  | 0.68669  | -2.41787 |
| H  | 3.63150  | 0.67247  | -0.74851 |
| H  | 2.38402  | -4.67068 | 1.17048  |

|   |          |          |          |
|---|----------|----------|----------|
| H | 3.59410  | -4.43918 | -0.10105 |
| H | 2.09160  | -3.49857 | -0.12684 |
| H | -3.55459 | 1.03874  | -2.99296 |
| H | -4.69086 | 0.04381  | -2.08694 |
| H | -3.23822 | -0.68382 | -2.76186 |
| H | 4.72676  | -1.21471 | -0.29925 |
| H | 5.81910  | -2.48317 | 0.26744  |
| H | 5.61189  | -1.00593 | 1.22028  |
| H | 5.10815  | -2.66635 | 3.65153  |
| H | 5.14151  | -4.20461 | 2.78011  |
| H | 3.73754  | -3.78837 | 3.78029  |
| H | -1.83995 | 0.82992  | -4.43239 |
| H | -0.57248 | 1.71671  | -5.26904 |
| H | -1.39051 | 2.45266  | -3.89803 |
| H | 4.24946  | 2.81066  | 2.51965  |
| H | 4.67073  | 1.44644  | 1.48591  |
| H | 4.60671  | 1.23019  | 3.24175  |
| H | -2.52504 | -1.14877 | 2.73938  |
| H | -2.84063 | 0.49965  | 3.27420  |
| H | -1.17960 | -0.05839 | 3.04444  |
| H | 1.83403  | -1.95461 | 7.14536  |
| H | -2.71660 | 2.95909  | -2.37780 |
| H | -1.55415 | 3.68677  | -1.26686 |
| H | -3.27325 | 3.71650  | -0.89104 |
| H | -3.47995 | -2.22335 | -0.76133 |
| H | -4.60843 | -1.54396 | 0.41438  |
| H | -3.12490 | -2.32873 | 0.95904  |
| H | -0.01888 | -2.53184 | -3.79181 |
| H | 0.13267  | -1.51160 | -5.22469 |
| H | -1.31540 | -1.42173 | -4.22470 |
| H | 0.38526  | 1.28014  | 3.92571  |
| H | 1.20671  | 2.84747  | 3.86561  |
| H | 1.94768  | 1.48578  | 4.72312  |
| H | 4.07692  | -1.51642 | 5.53051  |
| H | 3.58480  | -0.27036 | 4.38339  |
| H | 3.16220  | -0.12354 | 6.09578  |
| H | -1.28070 | -3.52336 | 2.46447  |
| H | -0.38603 | -2.20495 | 1.67330  |
| H | 0.34658  | -3.78802 | 1.84169  |
| H | 0.27631  | -3.53245 | 8.17500  |
| H | -1.25646 | -2.82447 | 7.65873  |
| H | -0.84324 | -4.46704 | 7.16888  |

103

Complex 3 '

|   |          |          |          |
|---|----------|----------|----------|
| C | -0.09398 | -0.32954 | -3.97265 |
| C | 1.12422  | -0.36386 | -3.24112 |
| C | 1.42309  | 0.96280  | -2.82231 |
| C | 0.38611  | 1.81785  | -3.29025 |
| C | -0.54686 | 1.01813  | -4.01008 |
| C | 2.04795  | -1.54074 | -3.14611 |
| C | 2.71579  | 1.41426  | -2.20770 |
| C | 0.41009  | 3.31812  | -3.20426 |

|    |          |          |          |
|----|----------|----------|----------|
| C  | -1.65202 | 1.50348  | -4.90170 |
| C  | -0.66750 | -1.45434 | -4.78140 |
| U  | -0.74285 | 0.19155  | -1.24571 |
| C  | -1.47011 | -2.08751 | -1.68640 |
| N  | 0.54048  | -0.26760 | 0.39460  |
| Si | 2.12881  | 1.65554  | 2.40309  |
| C  | 3.94040  | 1.93311  | 2.92636  |
| P  | 1.53978  | -0.50959 | 1.64562  |
| C  | 0.84481  | -1.45861 | 3.12767  |
| C  | -0.27642 | -2.31754 | 2.98573  |
| C  | -0.80696 | -2.94843 | 4.11450  |
| C  | -0.26234 | -2.80321 | 5.38903  |
| C  | 0.89130  | -2.03533 | 5.49795  |
| C  | 1.45837  | -1.37724 | 4.40094  |
| C  | -0.92120 | -2.64043 | 1.66777  |
| C  | -0.88798 | -3.46355 | 6.58702  |
| C  | 2.75459  | -0.65680 | 4.67930  |
| Si | 3.30924  | -1.94698 | 1.06713  |
| C  | 2.46151  | -3.31634 | 0.07492  |
| C  | 4.18180  | -2.75526 | 2.54704  |
| C  | 4.63988  | -1.05336 | 0.05568  |
| C  | 0.92956  | 2.16426  | 3.78392  |
| C  | 1.85798  | 2.78832  | 0.91525  |
| C  | -3.39603 | 0.06988  | -0.23019 |
| C  | -2.66359 | 0.85517  | 0.70050  |
| C  | -2.31661 | 2.08058  | 0.06011  |
| C  | -2.87443 | 2.07005  | -1.25054 |
| C  | -3.51591 | 0.81590  | -1.43856 |
| C  | -3.03025 | 3.29215  | -2.10600 |
| C  | -1.74591 | 3.29275  | 0.73714  |
| C  | -2.46965 | 0.56614  | 2.16104  |
| C  | -4.14003 | -1.20184 | 0.05135  |
| C  | -4.35805 | 0.39669  | -2.60886 |
| H  | -0.59737 | -2.69346 | -1.97691 |
| H  | -2.18633 | -2.15586 | -2.51825 |
| H  | -1.93199 | -2.58807 | -0.82814 |
| H  | -1.12285 | 3.02610  | 1.59403  |
| H  | -2.54530 | 3.94846  | 1.11170  |
| H  | -1.13215 | 3.89986  | 0.06300  |
| H  | -0.48123 | 3.75878  | -3.65546 |
| H  | 1.27539  | 3.72893  | -3.74122 |
| H  | 0.47251  | 3.69096  | -2.17444 |
| H  | 1.62426  | 3.79819  | 1.27016  |
| H  | 1.02936  | 2.43346  | 0.29909  |
| H  | 2.75419  | 2.84234  | 0.29363  |
| H  | -1.67346 | -3.59300 | 3.97989  |
| H  | 2.71595  | -1.46643 | -2.28490 |
| H  | 2.68222  | -1.61587 | -4.04100 |
| H  | 1.50432  | -2.48671 | -3.06221 |
| H  | 2.74285  | 2.50229  | -2.10180 |
| H  | 3.56903  | 1.13164  | -2.83868 |
| H  | 2.88439  | 0.98643  | -1.21555 |

|   |          |          |          |
|---|----------|----------|----------|
| H | 1.98055  | -4.02882 | 0.75191  |
| H | 3.19906  | -3.86298 | -0.52290 |
| H | 1.70304  | -2.90833 | -0.59633 |
| H | -4.29520 | 1.11294  | -3.43149 |
| H | -5.41669 | 0.32733  | -2.32508 |
| H | -4.07275 | -0.58640 | -3.00130 |
| H | 4.25404  | -0.59856 | -0.85754 |
| H | 5.40701  | -1.78251 | -0.23018 |
| H | 5.13110  | -0.27381 | 0.64617  |
| H | 4.86021  | -2.07403 | 3.06682  |
| H | 4.78117  | -3.58683 | 2.15706  |
| H | 3.47119  | -3.16493 | 3.26918  |
| H | -2.55690 | 0.89359  | -4.82281 |
| H | -1.33742 | 1.46457  | -5.95380 |
| H | -1.93054 | 2.53842  | -4.69264 |
| H | 4.13302  | 3.01020  | 2.85500  |
| H | 4.64087  | 1.43736  | 2.24734  |
| H | 4.16874  | 1.62107  | 3.94650  |
| H | -2.88640 | -0.40547 | 2.43727  |
| H | -2.98153 | 1.31846  | 2.77563  |
| H | -1.41641 | 0.55955  | 2.45683  |
| H | 1.38735  | -1.95032 | 6.46372  |
| H | -3.28328 | 3.04863  | -3.13961 |
| H | -2.13283 | 3.91674  | -2.11965 |
| H | -3.84518 | 3.92043  | -1.71905 |
| H | -4.17631 | -1.85574 | -0.82431 |
| H | -5.17823 | -0.98565 | 0.33974  |
| H | -3.69285 | -1.77621 | 0.86685  |
| H | -0.45336 | -2.43080 | -4.33934 |
| H | -0.24893 | -1.45640 | -5.79771 |
| H | -1.75439 | -1.37559 | -4.88338 |
| H | -0.07087 | 2.32391  | 3.37389  |
| H | 1.26735  | 3.11119  | 4.22072  |
| H | 0.84247  | 1.42627  | 4.58304  |
| H | 3.38259  | -1.26712 | 5.33568  |
| H | 3.33584  | -0.46106 | 3.77986  |
| H | 2.59425  | 0.29744  | 5.19162  |
| H | -1.68079 | -3.41572 | 1.80179  |
| H | -1.38843 | -1.76468 | 1.21881  |
| H | -0.19985 | -2.99834 | 0.93125  |
| H | -0.16509 | -3.59510 | 7.39733  |
| H | -1.71433 | -2.85834 | 6.97959  |
| H | -1.29924 | -4.44567 | 6.33407  |

## References

- [1] P. J. Fagan, J. M. Manriquez, E. A. Maatta, A. M. Seyam, T. J. Marks, *J. Am. Chem. Soc.* **1981**, 103, 6650-6667.
- [2] P. Rungthanaphatsophon, P. Huang, J. R. Walensky, *Organometallics* **2018**, 37, 1884-1891.
- [3] P. Rungthanaphatsophon, T. J. Duignan, A. J. Myers, S. P. Vilanova, C. L. Barnes, J. Autschbach, E. R. Batista, P. Yang, J. R. Walensky, *Inorg. Chem.* **2018**, 57, 7270-7278.
- [4] J. F. Janik, E. N. Duesler, W. F. McNamara, M. Westerhausen, R. T. Paine, *Organometallics* **1989**, 8, 506-514.
- [5] M. APEX2 Suite, WI, **2006**.
- [6] G. Sheldrick, *Acta Crystallogr. C* **2015**, 71, 3-8.
- [7] L. J. B. O. V. Dolomanov, R. J. Gildea, J. A. K. Howard, H. Puschmann, *J. Appl. Crystallogr.* **2009**, 42, 339-341.
- [8] M. J. Frisch, G. W. Trucks, H. B. Schlegel, G. E. Scuseria, M. A. Robb, J. R. Cheeseman, G. Scalmani, V. Barone, G. A. Petersson, H. Nakatsuji, X. Li, M. Caricato, A. V. Marenich, J. Bloino, B. G. Janesko, R. Gomperts, B. Mennucci, H. P. Hratchian, J. V. Ortiz, A. F. Izmaylov, J. L. Sonnenberg, Williams, F. Ding, F. Lipparini, F. Egidi, J. Goings, B. Peng, A. Petrone, T. Henderson, D. Ranasinghe, V. G. Zakrzewski, J. Gao, N. Rega, G. Zheng, W. Liang, M. Hada, M. Ehara, K. Toyota, R. Fukuda, J. Hasegawa, M. Ishida, T. Nakajima, Y. Honda, O. Kitao, H. Nakai, T. Vreven, K. Throssell, J. A. Montgomery Jr., J. E. Peralta, F. Ogliaro, M. J. Bearpark, J. J. Heyd, E. N. Brothers, K. N. Kudin, V. N. Staroverov, T. A. Keith, R. Kobayashi, J. Normand, K. Raghavachari, A. P. Rendell, J. C. Burant, S. S. Iyengar, J. Tomasi, M. Cossi, J. M. Millam, M. Klene, C. Adamo, R. Cammi, J. W.

- Ochterski, R. L. Martin, K. Morokuma, O. Farkas, J. B. Foresman, D. J. Fox, Wallingford, CT, **2016**.
- [9] (a) J. P. Perdew, J. A. Chevary, S. H. Vosko, K. A. Jackson, M. R. Pederson, D. J. Singh, C. Fiolhais, *Phys. Rev. B* **1992**, 46, 6671-6687; (b) A. D. Becke, *J. Chem. Phys.* **1993**, 98, 5648-5652.
- [10] (a) W. Küchle, M. Dolg, H. Stoll, H. Preuss, *J. Chem. Phys.* **1994**, 100, 7535-7542; (b) X. Cao, M. Dolg, H. Stoll, *J. Chem. Phys.* **2003**, 118, 487-496; (c) X. Cao, M. Dolg, *J. Mol. Struct.* **2004**, 673, 203-209.
- [11] W. Küchle, M. Dolg, H. Stoll, H. Preuss, *Mol. Phys.* **1991**, 74, 1245-1263.
- [12] (a) R. Ditchfield, W. J. Hehre, J. A. Pople, *J. Chem. Phys.* **1971**, 54, 724-728; (b) W. J. Hehre, R. Ditchfield, J. A. Pople, *J. Chem. Phys.* **1972**, 56, 2257-2261; (c) P. C. Hariharan, J. A. Pople, *Theor. Chem. Acc.* **1973**, 28, 213-222; (d) M. M. Francl, W. J. Pietro, W. J. Hehre, J. S. Binkley, M. S. Gordon, D. J. DeFrees, J. A. Pople, *J. Chem. Phys.* **1982**, 77, 3654-3665.
- [13] A. E. Reed, L. A. Curtiss, F. Weinhold, *Chem. Rev.* **1988**, 88, 899-926.
